# Supplementary material for: Co-pyrolysis of biomass and plastic waste into carbon materials with environmental applications: a critical review
Source: Royal Society of Chemistry journal article supplement (doi:10.1039/d4gc04842c), 2025-01-01
Supplement: d4gc04842c1.xlsx [file d4gc04842c1.xlsx]

## Sheet: 2024-04-19_Full record_4000
Publication Type	Authors	Book Authors	Book Editors	Book Group Authors	Author Full Names	Book Author Full Names	Group Authors	Article Title	Source Title	Book Series Title	Book Series Subtitle	Language	Document Type	Conference Title	Conference Date	Conference Location	Conference Sponsor	Conference Host	Author Keywords	Keywords Plus	Abstract	Addresses	Affiliations	Reprint Addresses	Email Addresses	Researcher Ids	ORCIDs	Funding Orgs	Funding Name Preferred	Funding Text	Cited References	Cited Reference Count	Times Cited, WoS Core	Times Cited, All Databases	180 Day Usage Count	Since 2013 Usage Count	Publisher	Publisher City	Publisher Address	ISSN	eISSN	ISBN	Journal Abbreviation	Journal ISO Abbreviation	Publication Date	Publication Year	Volume	Issue	Part Number
J	Salvilla, JNV; Ofrasio, BIG; Rollon, AP; Manegdeg, FG; Abarca, RRM; de Luna, MDG				Salvilla, John Nikko V.; Ofrasio, Bjorn Ivan G.; Rollon, Analiza P.; Manegdeg, Ferdinand G.; Abarca, Ralf Ruffel M.; de Luna, Mark Daniel G.			Synergistic co-pyrolysis of polyolefin plastics with wood and agricultural wastes for biofuel production	APPLIED ENERGY			English	Article						Combined mixture design; Co-pyrolysis; Lignocellulosic biomass; Plastic; Synergistic effect	BIO-OIL; THERMOCHEMICAL CONVERSION; RECENT PROGRESS; BIOMASS BLENDS; KINETICS; POLYETHYLENE; STOVER; POLYPROPYLENE; BEHAVIORS; DECOMPOSITION	Renewable lignocellulosic biomass is a promising energy resource since its co-pyrolysis with hydrogen-rich plastics can produce high-yield and high-quality bio-oil. In this study, co-pyrolysis of agricultural wastes (i.e. corn stover) and wood wastes (i.e. narra, Pterocarpus indicus and ipil, Intsia bijuga) with polyolefin plastics (i.e. polypropylene, low-density polyethylene, and high-density p…	[Salvilla, John Nikko V.; Ofrasio, Bjorn Ivan G.; Rollon, Analiza P.; Manegdeg, Ferdinand G.; de Luna, Mark Daniel G.] Univ Philippines Diliman, Energy Engn Program, Natl Grad Sch Engn, Quezon City 1101, Philippines; [Salvilla, John Nikko V.; Rollon, Analiza P.; de Luna, Mark Daniel G.] Univ Philippines Diliman, Dept Chem Engn, Quezon City 1101, Philippines; [Rollon, Analiza P.; Abarca, Ralf Ruff…	University of the Philippines System; University of the Philippines Diliman; University of the Philippines System; University of the Philippines Diliman; University of the Philippines System; University of the Philippines Diliman; University of the Philippines System; University of the Philippines Diliman	Salvilla, JNV; de Luna, MDG (corresponding author), Univ Philippines Diliman, Energy Engn Program, Natl Grad Sch Engn, Quezon City 1101, Philippines.	jvsalvilla@up.edu.ph; mgdeluna@up.edu.ph		Salvilla, John Nikko/0000-0002-8143-4147; Abarca, Ralf Ruffel/0000-0002-5340-4469	Department of Science and Technology, Philippines	Department of Science and Technology, Philippines(Department of Science & Technology (DOST), Philippines)	The authors would like to thank the Department of Science and Technology, Philippines for providing financial support for this research undertaking.		50	91	95	26	271	ELSEVIER SCI LTD	OXFORD	THE BOULEVARD, LANGFORD LANE, KIDLINGTON, OXFORD OX5 1GB, OXON, ENGLAND	0306-2619	1872-9118		APPL ENERG	Appl. Energy	DEC 1	2020	279
J	Ansari, KB; Hassan, SZ; Bhoi, R; Ahmad, E				Ansari, Khursheed B.; Hassan, Saeikh Zaffar; Bhoi, Rohidas; Ahmad, Ejaz			Co-pyrolysis of biomass and plastic wastes: A review on reactants synergy, catalyst impact, process parameter, hydrocarbon fuel potential, COVID-19	JOURNAL OF ENVIRONMENTAL CHEMICAL ENGINEERING			English	Review						Biomass and plastic/COVID-19 waste; Co-pyrolysis; Synergistics effect; Catalyst; Reactor parameter; Economic analysis	HIGH-DENSITY POLYETHYLENE; BIO-OIL; THERMOGRAVIMETRIC CHARACTERISTICS; LIGNOCELLULOSIC BIOMASS; VOLATILE PRODUCTS; THERMAL-BEHAVIOR; CELLULOSE; WOOD; CONVERSION; MIXTURES	Unprecedented growth in mixed plastic and biomass wastes such as plastic bags, drinking water bottles, agro-and-forestry-waste, along with COVID-19 driven waste (facemask, gloves, PPE kits, surgical masks) have obliged the scientific community to look for technologies that can process and convert both biomass and plastic wastes together into useful end-products. The co-pyrolysis of biomass and pl…	[Ansari, Khursheed B.] Aligarh Muslim Univ, Dept Chem Engn, Zakir Husain Coll Engn & Technol, Aligarh 202002, Uttar Pradesh, India; [Hassan, Saeikh Zaffar] Aligarh Muslim Univ, Dept Petr Studies, Zakir Husain Coll Engn & Technol, Aligarh 202002, Uttar Pradesh, India; [Bhoi, Rohidas] Malaviya Natl Inst Technol, Dept Chem Engn, Jaipur, Rajasthan, India; [Bhoi, Rohidas] Indian Inst Technol, Dept Che…	Zakir Husain College Of Engineering & Technology; Aligarh Muslim University; Aligarh Muslim University; Zakir Husain College Of Engineering & Technology; National Institute of Technology (NIT System); Malaviya National Institute of Technology Jaipur; Indian Institute of Technology System (IIT System); Indian Institute of Technology (IIT) - Bombay; Indian Institute of Technology System (IIT System…	Ansari, KB (corresponding author), Aligarh Muslim Univ, Dept Chem Engn, Zakir Husain Coll Engn & Technol, Aligarh 202002, Uttar Pradesh, India.	akabadruddin@myamu.ac.in	Badruddin, Dr. Ansari Khursheed/AAC-1965-2022; Bhoi, Rohidas/F-9824-2017; Ahmad, Ejaz/M-6092-2017	B. Ansari, Khursheed/0000-0002-6440-3170; Hassan, Saeikh Z./0000-0002-9576-3873; Ahmad, Ejaz/0000-0002-6142-5331					106	73	77	25	247	ELSEVIER SCI LTD	OXFORD	THE BOULEVARD, LANGFORD LANE, KIDLINGTON, OXFORD OX5 1GB, OXON, ENGLAND	2213-2929	2213-3437		J ENVIRON CHEM ENG	J. Environ. Chem. Eng.	DEC	2021	9	6
J	Uzoejinwa, BB; He, XH; Wang, S; Abomohra, A; Hu, YM; Wang, Q				Uzoejinwa, Benjamin Bernard; He, Xiuhua; Wang, Shuang; Abomohra, Abd El-Fatah; Hu, Yamin; Wang, Qian			Co-pyrolysis of biomass and waste plastics as a thermochemical conversion technology for high-grade biofuel production: Recent progress and future directions elsewhere worldwide	ENERGY CONVERSION AND MANAGEMENT			English	Review						Co-pyrolysis; Biomass; Waste plastics; Oil upgrading; Recent progress worldwide	BIO-OIL PRODUCTION; HIGH-DENSITY POLYETHYLENE; MUNICIPAL SOLID-WASTE; OF-THE-ART; SYNTHETIC-POLYMERS MIXTURES; POWER-GENERATION INDUSTRY; CATALYTIC FAST PYROLYSIS; WOOD BIOMASS; THERMOGRAVIMETRIC ANALYSIS; RENEWABLE ENERGY	Continuous growth of human population and industrialization has increased the energy demands all over the world and this has resulted in a number of energy related challenges including depletion of fossil fuels, environmental pollution, and shortage of electricity supply. These challenges made it imperative to develop and maximize the abundant renewable energy resources, particularly the biomass …	[Uzoejinwa, Benjamin Bernard; He, Xiuhua; Wang, Shuang; Abomohra, Abd El-Fatah; Hu, Yamin; Wang, Qian] Jiangsu Univ, Sch Energy & Power Engn, Zhenjiang 212013, Jiangsu, Peoples R China; [Uzoejinwa, Benjamin Bernard] Univ Nigeria, Dept Agr & Bioresources Engn, Nsukka 41001, Enugu State, Nigeria; [Abomohra, Abd El-Fatah] Tanta Univ, Fac Sci, Dept Bot, Tanta 31527, Egypt	Jiangsu University; University of Nigeria; Egyptian Knowledge Bank (EKB); Tanta University	He, XH; Wang, S (corresponding author), Jiangsu Univ, Sch Energy & Power Engn, Zhenjiang 212013, Jiangsu, Peoples R China.	xiuhua.he@ujs.edu.cn	Hu, Yamin/LFU-2544-2024; Abomohra, Abdelfatah/J-1006-2016	Abomohra, Abdelfatah/0000-0003-2784-3297	National Natural Science Foundation of China [51676091]; Jiangsu Overseas Research AMP; Training Program for University Prominent Young AMP; Middle-aged Teachers and Presidents	National Natural Science Foundation of China(National Natural Science Foundation of China (NSFC)); Jiangsu Overseas Research AMP; Training Program for University Prominent Young AMP; Middle-aged Teachers and Presidents	This work was supported by the National Natural Science Foundation of China (No. 51676091) and Jiangsu Overseas Research & Training Program for University Prominent Young & Middle-aged Teachers and Presidents.		216	413	433	44	782	PERGAMON-ELSEVIER SCIENCE LTD	OXFORD	THE BOULEVARD, LANGFORD LANE, KIDLINGTON, OXFORD OX5 1GB, ENGLAND	0196-8904	1879-2227		ENERG CONVERS MANAGE	Energy Conv. Manag.	MAY 1	2018	163
J	Esso, SBE; Zhe, X; Chaiwat, W; Kamara, MF; Xu, LF; Jun, X; Ebako, J; Long, J; Sheng, S; Song, H; Yi, W; Jun, X				Esso, Samy Berthold Engamba; Zhe Xiong; Chaiwat, Weerawut; Kamara, Melvina Fudia; Xu Longfei; Jun Xu; Ebako, Joseph; Long Jiang; Sheng Su; Song Hu; Yi Wang; Jun Xiang			Review on synergistic effects during co-pyrolysis of biomass and plastic waste: Significance of operating conditions and interaction mechanism	BIOMASS & BIOENERGY			English	Review						Organic solid waste; Biomass; Plastic; Co-pyrolysis; Co-pyrolysis interaction; Synergistic; interaction effect	HIGH-DENSITY POLYETHYLENE; CATALYTIC FAST PYROLYSIS; BIO-OIL PRODUCTION; LIGNOCELLULOSIC BIOMASS; THERMAL-BEHAVIOR; AROMATIC-HYDROCARBONS; WOOD BIOMASS; THERMOGRAVIMETRIC ANALYSIS; STEPWISE PYROLYSIS; BIOFUEL PRODUCTION	The quantity of organic solid waste (OSW) discharged by the public has increased significantly in recent years. Herein, we consider bio-waste and plastic waste. Bio-waste, also known as biomass, is a sustainable and abundant energy source available in diverse forms. Plastic waste is a cheap hydrogen source contained within OSW. The transformation of OSW via pyrolysis involves the thermochemical c…	[Esso, Samy Berthold Engamba; Zhe Xiong; Kamara, Melvina Fudia; Xu Longfei; Jun Xu; Long Jiang; Sheng Su; Song Hu; Yi Wang; Jun Xiang] Huazhong Univ Sci & Technol, Sch Energy & Power Engn, State Key Lab Coal Combust, Wuhan 430074, Peoples R China; [Chaiwat, Weerawut] Mahidol Univ, Div Environm Engn & Disaster Management, Kanchanaburi Campus, Sai Yok 71150, Kanchanaburi, Thailand; [Ebako, Joseph] …	Huazhong University of Science & Technology; Mahidol University; Ajou University	Yi, W (corresponding author), Huazhong Univ Sci & Technol, Sch Energy & Power Engn, State Key Lab Coal Combust, Wuhan 430074, Peoples R China.	I201822008@hust.edu.cn; alenwang@hust.edu.cn	Sheng, Su/E-7586-2014; song, hu/JVO-3838-2024	Ebako, Joseph/0000-0001-5465-2301	National Key R&D Program of China [2018YFE0127500]; National Natural Science Foundation of China (NSFC) [52122608, 51976074]	National Key R&D Program of China; National Natural Science Foundation of China (NSFC)(National Natural Science Foundation of China (NSFC))	Acknowledgements This research was financially supported by the National Key R&D Program of China (No. 2018YFE0127500) and the National Natural Science Foundation of China (NSFC) (No. 52122608 , 51976074) .		190	119	123	53	332	PERGAMON-ELSEVIER SCIENCE LTD	OXFORD	THE BOULEVARD, LANGFORD LANE, KIDLINGTON, OXFORD OX5 1GB, ENGLAND	0961-9534	1873-2909		BIOMASS BIOENERG	Biomass Bioenerg.	APR	2022	159
J	Cai, WF; Wang, XF; Zhu, Z; Kumar, R; Amaniampong, PN; Zhao, J; Hu, ZT				Cai, Wenfei; Wang, Xiaofang; Zhu, Zhi; Kumar, Reeti; Amaniampong, Prince Nana; Zhao, Jun; Hu, Zhong-Ting			Synergetic effects in the co-pyrolysis of lignocellulosic biomass and plastic waste for renewable fuels and chemicals	FUEL			English	Review						Synergetic effects; Pyrolysis; Lignocellulosic biomass; Plastics; Renewable fuels; Renewable chemicals	HIGH-DENSITY POLYETHYLENE; BIO-OIL PRODUCTION; PHYSICOCHEMICAL PROPERTIES; HYDROCARBON YIELD; THERMAL-BEHAVIOR; RECENT PROGRESS; PRODUCT YIELD; RICE HUSK; QUALITY; GAS	The use of lignocellulosic biomass pyrolysis to produce renewable fuels and high value-added chemicals can help alleviate the energy and resource crisis facing the world today. However, the direct pyrolysis of lignocellulosic biomass encountered some problems. For example, the bio-oil obtained from lignocellulosic biomass pyrolysis has the disadvantages of lower heating value with strong acidity …	[Cai, Wenfei; Zhu, Zhi; Kumar, Reeti; Zhao, Jun] Hong Kong Baptist Univ, Inst Bioresource & Agr, Sino Forest Appl Res Ctr Pearl River Delta Environ, Dept Biol, Hong Kong, Peoples R China; [Wang, Xiaofang; Hu, Zhong-Ting] Zhejiang Univ Technol, Inst Environm Chem Engn, Coll Environm, Hangzhou 310014, Peoples R China; [Amaniampong, Prince Nana] Univ Poitiers, Inst Chim Milieux & Materiaux Poitiers,…	Hong Kong Baptist University; Zhejiang University of Technology; Centre National de la Recherche Scientifique (CNRS); Universite de Poitiers	Zhao, J (corresponding author), Hong Kong Baptist Univ, Inst Bioresource & Agr, Sino Forest Appl Res Ctr Pearl River Delta Environ, Dept Biol, Hong Kong, Peoples R China.;Hu, ZT (corresponding author), Zhejiang Univ Technol, Inst Environm Chem Engn, Coll Environm, Hangzhou 310014, Peoples R China.	zhaojun@hkbu.edu.hk; zthu@zjut.edu.cn	Zhao, Jun/AAA-3317-2022; zhu, zhi/GNM-8892-2022; CAI, WENFEI/KGK-4409-2024	Zhao, Jun/0000-0003-3599-0318; CAI, Wenfei/0000-0002-3716-782X	Hong Kong Innovation and Technology Fund [PRP/044/19FX]	Hong Kong Innovation and Technology Fund	Acknowledgment This work is supported by Hong Kong Innovation and Technology Fund (PRP/044/19FX) .		113	42	42	79	324	ELSEVIER SCI LTD	London	125 London Wall, London, ENGLAND	0016-2361	1873-7153		FUEL	Fuel	DEC 1	2023	353
J	Wang, ZW; Burra, KG; Lei, TZ; Gupta, AK				Wang, Zhiwei; Burra, Kiran G.; Lei, Tingzhou; Gupta, Ashwani K.			Co-pyrolysis of waste plastic and solid biomass for synergistic production of biofuels and chemicals-A review	PROGRESS IN ENERGY AND COMBUSTION SCIENCE			English	Review						Waste plastic; Solid biomass; Co-pyrolysis; Blend ratio; Synergistic effect; Catalytic co-pyrolysis; Liquid products; Gas products; Solid products	HIGH-DENSITY POLYETHYLENE; CATALYTIC FAST PYROLYSIS; BIO-OIL PRODUCTION; FUEL RANGE ALKANES; RUBBER SEED SHELL; LIGNOCELLULOSIC BIOMASS; THERMAL-BEHAVIOR; AROMATIC-HYDROCARBONS; POLYVINYL-CHLORIDE; THERMOGRAVIMETRIC CHARACTERISTICS	The amount of plastics disposed from modern lifestyles have increased sharply in recent years. Solid biomass is an abundant energy resource that exists worldwide. Transformation of these waste plastics and solid biomass feedstock mixtures via co-pyrolysis can provide synergistic product enhancement for fuels and value-added products. The produced products can be used as chemicals and pollutant so…	[Wang, Zhiwei; Burra, Kiran G.; Gupta, Ashwani K.] Univ Maryland, Dept Mech Engn, Combust Lab, College Pk, MD 20742 USA; [Wang, Zhiwei] Henan Univ Technol, Sch Environm Engn, Zhengzhou 450001, Peoples R China; [Lei, Tingzhou] Changzhou Univ, Inst Urban & Rural Min, Changzhou 213164, Jiangsu, Peoples R China	University System of Maryland; University of Maryland College Park; Henan University of Technology; Changzhou University	Gupta, AK (corresponding author), Univ Maryland, Dept Mech Engn, Combust Lab, College Pk, MD 20742 USA.	akgupta@umd.edu	Wang, Zhi-Wei/P-1561-2018	Gupta, Ashwani/0000-0001-8047-8706	US Office of Naval Research (ONR); China National Key RD projects [2019YFD1100604]; China Scholarship Council (CSC) under the International Clean Energy Talent Project; University of Maryland	US Office of Naval Research (ONR)(United States Department of DefenseUnited States NavyOffice of Naval Research); China National Key RD projects; China Scholarship Council (CSC) under the International Clean Energy Talent Project(China Scholarship Council); University of Maryland	This research was supported by the US Office of Naval Research (ONR) and is gratefully acknowledged. The support provided to Zhiwei Wang from China National Key R&D projects (2019YFD1100604), and China Scholarship Council (CSC) under the International Clean Energy Talent Project is gratefully acknowledged. Kiran Burra received the Hulka Fellowship support at the University of Maryland and is grat…		259	359	381	107	1057	PERGAMON-ELSEVIER SCIENCE LTD	OXFORD	THE BOULEVARD, LANGFORD LANE, KIDLINGTON, OXFORD OX5 1GB, ENGLAND	0360-1285	1873-216X		PROG ENERG COMBUST	Prog. Energy Combust. Sci.	MAY	2021	84
J	Alabdrabalnabi, A; Gautam, R; Sarathy, SM				Alabdrabalnabi, Aessa; Gautam, Ribhu; Sarathy, S. Mani			Machine learning to predict biochar and bio-oil yields from co-pyrolysis of biomass and plastics	FUEL			English	Article						Co-pyrolysis; Biomass; Polymers; Machine learning; Bio-oil; Biochar	WASTE; COMBUSTION; CONVERSION; CHEMICALS; POINT	Because of high oxygen content, pH and viscosity, pyrolysis bio-oil is of low quality. Upgrading bio-oil can be achieved by co-pyrolysis of biomass with waste plastics, and it is seen as a promising measure for mitigating waste. In this work, machine learning models were developed to predict yields from the co-pyrolysis of biomass and plastics. Classical machine learning and neural network algori…	[Alabdrabalnabi, Aessa; Gautam, Ribhu; Sarathy, S. Mani] King Abdullah Univ Sci & Technol, Clean Combust Res Ctr, Phys Sci & Engn Div, Thuwal 239556900, Saudi Arabia	King Abdullah University of Science & Technology	Gautam, R (corresponding author), King Abdullah Univ Sci & Technol, Clean Combust Res Ctr, Phys Sci & Engn Div, Thuwal 239556900, Saudi Arabia.	ribhu.gautam@kaust.edu.sa	Gautam, Ribhu/AAT-7218-2020; Sarathy, S. Mani/M-5639-2015	Alabdrabalnabi, Aessa/0000-0002-0591-9572; Sarathy, S. Mani/0000-0002-3975-6206; Gautam, Ribhu/0000-0002-5567-7778	King Abdullah University of Science and Technology (KAUST) Office of Sponsored Research [OSR-2019-CRG7-4077]	King Abdullah University of Science and Technology (KAUST) Office of Sponsored Research(King Abdullah University of Science & Technology)	This work was supported by King Abdullah University of Science and Technology (KAUST) Office of Sponsored Research under the award number OSR-2019-CRG7-4077. The authors would also like to thank Ibex, high-performance computing at KAUST.		39	68	70	81	265	ELSEVIER SCI LTD	OXFORD	THE BOULEVARD, LANGFORD LANE, KIDLINGTON, OXFORD OX5 1GB, OXON, ENGLAND	0016-2361	1873-7153		FUEL	Fuel	NOV 15	2022	328
J	Prasertpong, P; Onsree, T; Khuenkaeo, N; Tippayawong, N; Lauterbach, J				Prasertpong, Prapaporn; Onsree, Thossaporn; Khuenkaeo, Nattawut; Tippayawong, Nakorn; Lauterbach, Jochen			Exposing and understanding synergistic effects in co-pyrolysis of biomass and plastic waste via machine learning	BIORESOURCE TECHNOLOGY			English	Article						AI; Bioenergy; Mixed biomass; Waste-to-energy; Regression	POLYETHYLENE	During co-pyrolysis of biomass with plastic waste, bio-oil yields (BOY) could be either induced or reduced significantly via synergistic effects (SE). However, investigating/ interpreting the SE and BOY in multidimensional domains is complicated and limited. This work applied XGBoost machine-learning and Shapley additive explanation (SHAP) to develop interpretable/ explainable models for predicti…	[Prasertpong, Prapaporn] Rajamangala Univ Technol Thanyaburi, Dept Mech Engn, Pathum Thani 12120, Thailand; [Onsree, Thossaporn; Lauterbach, Jochen] Univ South Carolina, Dept Chem Engn, Columbia, SC 29201 USA; [Khuenkaeo, Nattawut] Chiang Mai Univ, Fac Engn, Grad Program Energy Engn, Chiang Mai 50200, Thailand; [Khuenkaeo, Nattawut; Tippayawong, Nakorn] Chiang Mai Univ, Fac Engn, Dept Mech Engn, …	Rajamangala University of Technology Thanyaburi; University of South Carolina System; University of South Carolina Columbia; Chiang Mai University; Chiang Mai University	Tippayawong, N (corresponding author), Chiang Mai Univ, Fac Engn, Dept Mech Engn, Chiang Mai 50200, Thailand.	n.tippayawong@yahoo.com	Tippayawong, Nakorn/AAU-8066-2021		Office of the Permanent Secretary, Ministry of Higher Education, Science, Research and Innovation [RGNS 64-108]; National Research Council of Thailand; Chiang Mai University	Office of the Permanent Secretary, Ministry of Higher Education, Science, Research and Innovation; National Research Council of Thailand(National Research Council of Thailand (NRCT)); Chiang Mai University	This work was partially funded by Office of the Permanent Secretary, Ministry of Higher Education, Science, Research and Innovation (Grant no. RGNS 64-108), National Research Council of Thailand and Chiang Mai University. The authors greatly appreciate the kind support from the South Carolina Smartstate Center for Strategic Approaches to the Generation of Electricity (SAGE), and Rajamangala Unive…		49	31	31	36	104	ELSEVIER SCI LTD	London	125 London Wall, London, ENGLAND	0960-8524	1873-2976		BIORESOURCE TECHNOL	Bioresour. Technol.	FEB	2023	369
J	Dyer, AC; Nahil, MA; Williams, PT				Dyer, Andrew C.; Nahil, Mohamad A.; Williams, Paul T.			Catalytic co-pyrolysis of biomass and waste plastics as a route to upgraded bio-oil	JOURNAL OF THE ENERGY INSTITUTE			English	Article						Pyrolysis; Biomass; Plastics; Zeolite; Bio-oil	HIGH-DENSITY POLYETHYLENE; RECENT PROGRESS; CELLULOSE; HZSM-5; CONVERSION; FUEL	A two-stage reactor system consisting of co-pyrolysis of biomass and plastic in the 1st stage and catalytic upgrading (zeolite ZSM-5 catalyst) of the derived pyrolysis gases in the 2nd stage was used to investigate the yield and composition of the product gases and bio-oil. Biomass waste wood and waste plastics in the form of high density polyethylene, low density polyethylene, polypropylene, pol…	[Dyer, Andrew C.; Nahil, Mohamad A.; Williams, Paul T.] Univ Leeds, Sch Chem & Proc Engn, Leeds LS2 9JT, W Yorkshire, England	University of Leeds	Williams, PT (corresponding author), Univ Leeds, Sch Chem & Proc Engn, Leeds LS2 9JT, W Yorkshire, England.	p.t.williams@leeds.ac.uk	NAHIL, MOHAMAD/J-2907-2017; Williams, Paul/J-2902-2013	Dyer, Andrew/0000-0002-4511-5501	UK Engineering & Physical Science Research Council (EPSRC) via the EPSRC Centre for Doctoral Training in Bioenergy [EP/L014912/1]; EPSRC [EP/S017127/1, EP/V036696/1] Funding Source: UKRI	UK Engineering & Physical Science Research Council (EPSRC) via the EPSRC Centre for Doctoral Training in Bioenergy(UK Research & Innovation (UKRI)Engineering & Physical Sciences Research Council (EPSRC)); EPSRC(UK Research & Innovation (UKRI)Engineering & Physical Sciences Research Council (EPSRC))	We gratefully acknowledge the support of the UK Engineering & Physical Science Research Council (EPSRC) for a research scholarship for ACD via the EPSRC Centre for Doctoral Training in Bioenergy (EP/L014912/1) .		35	79	84	19	172	ELSEVIER SCI LTD	OXFORD	THE BOULEVARD, LANGFORD LANE, KIDLINGTON, OXFORD OX5 1GB, OXON, ENGLAND	1743-9671	1746-0220		J ENERGY INST	J. Energy Inst.	AUG	2021	97
J	Bhagat, SP; Gera, P; Bhavanam, A				Bhagat, Satish P.; Gera, Poonam; Bhavanam, Anjireddy			Catalytic co-pyrolysis of Pterospermum acerifolium and plastic waste	JOURNAL OF MATERIAL CYCLES AND WASTE MANAGEMENT			English	Article; Proceedings Paper	4th 3R International Scientific Conference on Material Cycles and Waste Management (3RINCs)	MAR 08-10, 2017	New Delhi, INDIA			Waste plastic; Biomass; Red mud; Catalytic co-pyrolysis	ACTIVATION-ENERGY MODEL; BIOMASS PYROLYSIS; REACTION-KINETICS; SOLID-WASTE; RED MUD; CELLULOSE; EVOLUTION; FUELS	The continuous increase in generation of solid wastes and gradual declining of fossil fuels necessities the development of sustainable conversion technologies. Recent studies have shown that the addition of biomass with hydrogen-rich co-reactants (plastics) altogether enhances the quality of bio-fuels using pyrolysis process. It was observed that red mud (which is produced as by-product in Bayer …	[Bhagat, Satish P.; Gera, Poonam; Bhavanam, Anjireddy] Dr B R Ambedkar Natl Inst Technol, Dept Chem Engn, Jalandhar 144011, Punjab, India	National Institute of Technology (NIT System); Dr B R Ambedkar National Institute of Technology Jalandhar	Bhagat, SP (corresponding author), Dr B R Ambedkar Natl Inst Technol, Dept Chem Engn, Jalandhar 144011, Punjab, India.	satishbhagat2703@gmail.com	bhavanam, anjireddy/X-8604-2019; Gera, Poonam/X-8427-2019	Bhavanam, Anjireddy/0000-0001-8906-6775					41	7	7	9	69	SPRINGER	NEW YORK	ONE NEW YORK PLAZA, SUITE 4600, NEW YORK, NY, UNITED STATES	1438-4957	1611-8227		J MATER CYCLES WASTE	J. Mater. Cycles Waste Manag.	OCT	2018	20	4
J	Wu, MG; Wang, ZW; Chen, GF; Zhang, MJ; Sun, TL; Wang, Q; Zhu, HN; Guo, SH; Chen, Y; Zhu, YJ; Lei, TZ; Burra, KG; Gupta, AK				Wu, Mengge; Wang, Zhiwei; Chen, Gaofeng; Zhang, Mengju; Sun, Tanglei; Wang, Qun; Zhu, Huina; Guo, Shuaihua; Chen, Yan; Zhu, Youjian; Lei, Tingzhou; Burra, Kiran G.; Gupta, Ashwani K.			Synergistic effects and products distribution during Co-pyrolysis of biomass and plastics	JOURNAL OF THE ENERGY INSTITUTE			English	Article						Rapeseed stalk; Waste plastics; Co-pyrolysis; Py-GC/MS; Product distribution; Synergistic effects	WOOD; GASIFICATION; POLYETHYLENE; CELLULOSE; MIXTURES; SHELL; CHAR	Co-pyrolysis of agricultural biomass and plastic wastes is examined here from the perspective of enhanced value products, energy production, and pollution reduction. The effect of different species of plastic on the products distribution during co-pyrolysis with biomass, or rapeseed stalk (RS) with polyethylene terephthalate (PET), polypropylene (PP) and polyvinyl chloride (PVC) was performed usi…	[Wu, Mengge; Wang, Zhiwei; Wang, Qun; Zhu, Huina; Guo, Shuaihua; Chen, Yan] Henan Univ Technol, Sch Environm Engn, Zhengzhou 450001, Peoples R China; [Wu, Mengge; Wang, Zhiwei; Wang, Qun; Zhu, Huina; Guo, Shuaihua; Chen, Yan] Henan Univ Technol, Inst Carbon Neutral, Zhengzhou 450001, Peoples R China; [Chen, Gaofeng] Xiamen Univ, Coll Energy, Xiamen 361102, Peoples R China; [Zhang, Mengju] Henan A…	Henan University of Technology; Henan University of Technology; Xiamen University; Henan Academy of Sciences; Changzhou University; Zhengzhou University of Light Industry; University System of Maryland; University of Maryland College Park	Wang, ZW (corresponding author), Henan Univ Technol, Sch Environm Engn, Zhengzhou 450001, Peoples R China.;Lei, TZ (corresponding author), Changzhou Univ, Inst Urban & Rural Min, Changzhou 213164, Peoples R China.;Gupta, AK (corresponding author), Univ Maryland, Dept Mech Engn, Combust Lab, College Pk, MD 20742 USA.	bioenergy@163.com; leitingzhou@163.com; akgupta@umd.edu	Wang, Zhi-Wei/P-1561-2018	Gupta, Ashwani/0000-0001-8047-8706	National Natural Science Founda-tion of China [52276181]; Henan Province Talent Project [194200510028]	National Natural Science Founda-tion of China(National Natural Science Foundation of China (NSFC)); Henan Province Talent Project	This study was supported by the National Natural Science Founda-tion of China (52276181) , and Henan Province Talent Project (194200510028) .		46	26	27	26	113	ELSEVIER SCI LTD	London	125 London Wall, London, ENGLAND	1743-9671	1746-0220		J ENERGY INST	J. Energy Inst.	DEC	2023	111
J	Muniyappan, D; Shrikar, B; Azhagu, U; Begum, KMMS; Vinayakaselvi, MA; Ramanathan, A				Muniyappan, Dineshkumar; Shrikar, Banagiri; Azhagu, Uthayakumar; Begum, K. M. Meera Sheriffa; Vinayakaselvi, M. Angkayarkan; Ramanathan, Anand			Research progress in the co-pyrolysis of renewable biomass with plastic wastes for the synergetic production of chemicals and biofuels: A review	JOURNAL OF RENEWABLE AND SUSTAINABLE ENERGY			English	Review							HIGH-DENSITY POLYETHYLENE; BIO-OIL PRODUCTION; CATALYTIC FAST PYROLYSIS; ACTIVATION-ENERGY MODEL; LIGNOCELLULOSIC BIOMASS; TG-FTIR; THERMAL-DEGRADATION; ALMOND SHELLS; HIGH-GRADE; AROMATIC-HYDROCARBONS	The quantity of plastic waste generated by the public has increased dramatically over the years. Biomass is an abundant and substantial energy resource found in diverse forms all over the planet. In this regard, the co-pyrolysis of plastic and biomass wastes is an attractive option to mitigate the issue of waste accumulation and viable fuel production. This review focuses on progress in waste dis…	[Muniyappan, Dineshkumar; Shrikar, Banagiri; Azhagu, Uthayakumar; Ramanathan, Anand] Natl Inst Technol, Dept Mech Engn, Bio Energy Lab, Tiruchirappalli 620015, India; [Begum, K. M. Meera Sheriffa] Natl Inst Technol, Dept Chem Engn, Separat Proc Lab, Tiruchirappalli 620015, India; [Vinayakaselvi, M. Angkayarkan] Bharathidasan Univ, Dept English, Tiruchirappalli, Tamil Nadu, India	National Institute of Technology (NIT System); National Institute of Technology Tiruchirappalli; National Institute of Technology (NIT System); National Institute of Technology Tiruchirappalli; Bharathidasan University	Ramanathan, A (corresponding author), Natl Inst Technol, Dept Mech Engn, Bio Energy Lab, Tiruchirappalli 620015, India.	anandachu@nitt.edu	Ramanathan, Anand/AAS-7185-2020; Muniyappan, Dineshkumar/ACA-2858-2022; M., MEERA/X-5588-2019	Banagiri, Shrikar/0000-0002-3974-5099; Muniyappan, Dineshkumar/0000-0002-4586-3542; Ramanathan, Anand/0000-0002-2243-1413; AZHAGU, UTHAYAKUMAR/0000-0003-3894-9353	Scheme for Promotion of Academic and Research Collaboration, MHRD [SPARC/2018-2019/P965/SL]	Scheme for Promotion of Academic and Research Collaboration, MHRD	ACKNOWLEDGMENTS This research work was supported by the Scheme for Promotion of Academic and Research Collaboration, MHRD (Project No. SPARC/2018-2019/P965/SL), and the authors gratefully acknowledge SPARC-MHRD. We would like to express our gratitude to the publishers for allowing us to utilize the graphs and images from previous publications. The authors would like to thank Director of NIT Tiruc…		258	8	8	7	60	AIP Publishing	MELVILLE	1305 WALT WHITMAN RD, STE 300, MELVILLE, NY 11747-4501 USA	1941-7012			J RENEW SUSTAIN ENER	J. Renew. Sustain. Energy	MAR	2023	15	2
J	Gin, AW; Hassan, H; Ahmad, MA; Hameed, BH; Din, ATM				Gin, A. W.; Hassan, H.; Ahmad, M. A.; Hameed, B. H.; Din, A. T. Mohd			Recent progress on catalytic co-pyrolysis of plastic waste and lignocellulosic biomass to liquid fuel: The influence of technical and reaction kinetic parameters	ARABIAN JOURNAL OF CHEMISTRY			English	Review						Catalytic co-pyrolysis; Biomass; Plastics waste; Heating rate; Liquid fuel; Kinetic models	HIGH-DENSITY POLYETHYLENE; MICROWAVE-ASSISTED PYROLYSIS; THERMAL-BEHAVIOR; ACTIVATION-ENERGIES; POLYVINYL-CHLORIDE; POLYSTYRENE WASTE; SYNTHESIS GAS; SOLID-WASTE; RICE STRAW; OIL	Discharge of non-biodegradable plastic waste and lignocellulosic biomass into the environment, and the resultant pollution has persistently increased all over the globe. This activity poses a threat not only to mankind, but also to the environment. In addressing this challenge, catalytic co-pyrolysis (CCP) of plastic waste and lignocellulosic biomass is one of the attractive ways used to reduce t…	[Gin, A. W.; Ahmad, M. A.; Din, A. T. Mohd] Univ Sains Malaysia, Sch Chem Engn, Engn Campus, Nibong Tebal 14300, Penang, Malaysia; [Gin, A. W.] Fed Univ Wukari, Fac Engn, Wukari 670101, Taraba State, Nigeria; [Hassan, H.] Univ Teknol MARA, Fac Chem Engn, Cawangan Pulau Pinang, Permatang Pauh 13500, Pulau Pinang, Malaysia; [Hameed, B. H.] Qatar Univ, Coll Engn, Dept Chem Engn, POB 2713, Doha, Qatar	Universiti Sains Malaysia; Universiti Teknologi MARA; Qatar University	Din, ATM (corresponding author), Univ Sains Malaysia, Sch Chem Engn, Engn Campus, Nibong Tebal 14300, Pulau Pinang, Malaysia.	chazam@usm.my	Hameed, Bassim/C-1270-2009; Hassan, Hamizura/HDO-2268-2022; Gin, Abel/AAO-3211-2021; Mohd Din, Azam Taufik/A-4774-2012; Ahmad, Mohd Azmier/B-3246-2011	Mohd Din, Azam Taufik/0000-0002-9075-5989; GIN, ABEL/0000-0001-5791-4282; Ahmad, Mohd Azmier/0000-0001-8412-2491	Lotte Chemical Titan (M) Sdn. Bhd.; Universiti Sains Malaysia [304/PJKIMIA/6050422/L128]	Lotte Chemical Titan (M) Sdn. Bhd.; Universiti Sains Malaysia(Universiti Sains Malaysia)	The authors thankfully acknowledge the support obtained from Lotte Chemical Titan (M) Sdn. Bhd. and Universiti Sains Malaysia (Grant Number: 304/PJKIMIA/6050422/L128), in the form of research grant and facilities which brought forth this article.		161	64	68	6	94	ELSEVIER	AMSTERDAM	RADARWEG 29, 1043 NX AMSTERDAM, NETHERLANDS	1878-5352	1878-5379		ARAB J CHEM	Arab. J. Chem.	APR	2021	14	4
J	Wang, XB; Ma, DY; Jin, QM; Deng, SH; Stancin, H; Tan, HZ; Mikulcic, H				Wang, Xuebin; Ma, Daoyang; Jin, Qiming; Deng, Shuanghui; Stancin, Hrvoje; Tan, Houzhang; Mikulcic, Hrvoje			Synergistic effects of biomass and polyurethane co-pyrolysis on the yield, reactivity, and heating value of biochar at high temperatures	FUEL PROCESSING TECHNOLOGY			English	Article						Plastic waste; Biomass; Co-pyrolysis; Synergistic effect; Char oxidation	SOOT FORMATION; PLASTIC WASTE; CARBON-BLACK; GAS-PHASE; CHLORINE; RELEASE; TIRES; GASIFICATION; POLYETHYLENE; SLUDGE	Biochar is a valuable solid product from the pyrolysis of solid wastes including biomass and plastic. In this study, the synergistic effects of biomass and polyurethane co-pyrolysis on the yield, reactivity, and heating value of char were investigated in a fixed-bed reactor. The reactivity and heating value were measured by a thermogravimetric analyzer. The effects of pyrolysis temperature, mixin…	[Wang, Xuebin; Ma, Daoyang; Jin, Qiming; Deng, Shuanghui; Tan, Houzhang; Mikulcic, Hrvoje] Xi An Jiao Tong Univ, MOE Key Lab Thermofluid Sci & Engn, Xian 710049, Shaanxi, Peoples R China; [Stancin, Hrvoje] Univ Zagreb, Fac Mech Engn & Naval Architecture, Zagreb 10000, Croatia	Xi'an Jiaotong University; University of Zagreb; University of Zagreb Faculty of Mechanical Engineering & Naval Architecture	Mikulcic, H (corresponding author), Xi An Jiao Tong Univ, MOE Key Lab Thermofluid Sci & Engn, Xian 710049, Shaanxi, Peoples R China.	Hrvoje.Mikulcic@fsb.hr	Stančin, Hrvoje/AAB-6854-2020; Wang, Xuebin/C-7203-2015	Stancin, Hrvoje/0000-0001-8481-9096; Wang, Xuebin/0000-0003-4270-7330; Jin, Qiming/0000-0001-9945-8596	National Key Research and Development Program of China [2017YFB0603902]; National Natural Science Foundation of China [51676157, 5161101654]; Fundamental Research Funds for the Central Universities; Natural Science Basic Research Plan in Shaanxi Province of China [2017JZ010]	National Key Research and Development Program of China(National Key Research & Development Program of China); National Natural Science Foundation of China(National Natural Science Foundation of China (NSFC)); Fundamental Research Funds for the Central Universities(Fundamental Research Funds for the Central Universities); Natural Science Basic Research Plan in Shaanxi Province of China	The authors greatly acknowledge the National Key Research and Development Program of China (No. 2017YFB0603902), and the financial support of the National Natural Science Foundation of China (Nos. 51676157 and 5161101654), the Fundamental Research Funds for the Central Universities, and Natural Science Basic Research Plan in Shaanxi Province of China (2017JZ010). The co-authors Mikulcic and Wang …		47	72	76	10	263	ELSEVIER	AMSTERDAM	RADARWEG 29, 1043 NX AMSTERDAM, NETHERLANDS	0378-3820	1873-7188		FUEL PROCESS TECHNOL	Fuel Process. Technol.	NOV	2019	194
J	Singh, M; Salaudeen, SA; Gilroyed, BH; Al-Salem, SM; Dutta, A				Singh, Maninderjit; Salaudeen, Shakirudeen A.; Gilroyed, Brandon H.; Al-Salem, Sultan M.; Dutta, Animesh			A review on co-pyrolysis of biomass with plastics and tires: recent progress, catalyst development, and scaling up potential	BIOMASS CONVERSION AND BIOREFINERY			English	Review						Co-pyrolysis; Plastics; Biomass; Tires; Synergistic	HIGH-DENSITY POLYETHYLENE; BIO-OIL PRODUCTION; MICROWAVE-ASSISTED PYROLYSIS; FIXED-BED REACTOR; FLUIDIZED-BED; WASTE TIRE; LIGNOCELLULOSIC BIOMASS; IN-SITU; HYDROCARBON YIELD; WOOD BIOMASS	With increases in population and industrialization, global energy demand is increasing rapidly and resulting in various environmental challenges related to fossil fuel consumption. These challenges have made it imperative to look for alternative means of environmentally sustainable energy production, such as the thermal degradation of biomass. Biofuels obtained from pyrolysis have the potential t…	[Singh, Maninderjit; Salaudeen, Shakirudeen A.; Dutta, Animesh] Univ Guelph, Sch Engn, Mech Engn Program, Guelph, ON N1G 2W1, Canada; [Salaudeen, Shakirudeen A.] Univ Prince Edward Isl, Fac Sustainable Design Engn, 550 Univ Ave, Charlottetown, PE C1A 4P3, Canada; [Gilroyed, Brandon H.] Univ Guelph, Sch Environm Sci, Ridgetown Campus, Ridgetown, ON N0P 2C0, Canada; [Al-Salem, Sultan M.] Kuwait Ins…	University of Guelph; University of Prince Edward Island; University of Guelph; Kuwait Institute for Scientific Research	Dutta, A (corresponding author), Univ Guelph, Sch Engn, Mech Engn Program, Guelph, ON N1G 2W1, Canada.	adutta@uoguelph.ca	Al-Salem, S.M./AAI-7888-2020; Salaudeen, Shakirudeen/IQU-7856-2023; Dutta, Animesh/I-5035-2014	Dutta, Animesh/0000-0002-9995-807X; Salaudeen, Shakirudeen/0000-0001-6046-4366	Natural Sciences and Engineering Research Council (NSERC Discovery); Ontario Ministry of Agriculture, Food and Rural Affairs (OMAFRA)-University of Guelph Partnership Program	Natural Sciences and Engineering Research Council (NSERC Discovery)(Natural Sciences and Engineering Research Council of Canada (NSERC)); Ontario Ministry of Agriculture, Food and Rural Affairs (OMAFRA)-University of Guelph Partnership Program	This work was supported by the Natural Sciences and Engineering Research Council (NSERC Discovery) and the Ontario Ministry of Agriculture, Food and Rural Affairs (OMAFRA)-University of Guelph Partnership Program.		197	21	22	15	179	SPRINGER HEIDELBERG	HEIDELBERG	TIERGARTENSTRASSE 17, D-69121 HEIDELBERG, GERMANY	2190-6815	2190-6823		BIOMASS CONVERS BIOR	Biomass Convers. Biorefinery	JUL	2023	13	10
J	Pattanayak, S; Loha, C; Singh, RK; Saha, D				Pattanayak, Satyajit; Loha, Chanchal; Singh, Rohit Kumar; Saha, Dipankar			Experimental investigation of thermal performance, kinetic triplets, and synergistic effect for bamboo-waste plastic (PP & PE) blends using thermogravimetric analyser in N2 atmosphere	SUSTAINABLE ENERGY TECHNOLOGIES AND ASSESSMENTS			English	Article						Co-pyrolysis; Bamboo; Waste plastic; TGA; Synergistic effect; Kinetic triplets	SUGAR-CANE BAGASSE; CO-PYROLYSIS; CATALYTIC PYROLYSIS; BIOMASS; BEHAVIOR; TEMPERATURE	Co-pyrolysis of lignocellulosic biomass with other feedstock can improve the pyrolysis process of biomass due to synergistic effect and it also has the potential to minimize the carbon footprint. In India, bamboo is abundantly available which can be considered as a potential source of energy. On the other side, plastic waste management is a major concern. Therefore, co-pyrolysis of bamboo with po…	[Pattanayak, Satyajit; Loha, Chanchal] CSIR, Energy Res Technol Grp, Cent Mech Engn Res Inst, Durgapur 713209, West Bengal, India; [Pattanayak, Satyajit] Madanapalle Inst Technol Sci, Dept Mech Engn, Madanapalle 517325, Andhra Pradesh, India; [Singh, Rohit Kumar] Natl Inst Technol Durgapur, Dept Chem Engn, Durgapur 713209, West Bengal, India; [Saha, Dipankar] Siliguri Inst Technol, Dept Engn Sci …	Council of Scientific & Industrial Research (CSIR) - India; CSIR - Central Mechanical Engineering Research Institute (CMERI); Madanapalle Institute of Technology & Science; National Institute of Technology (NIT System); National Institute of Technology Durgapur	Loha, C (corresponding author), CSIR, Energy Res Technol Grp, Cent Mech Engn Res Inst, Durgapur 713209, West Bengal, India.	chanchal.loha@gmail.com	Pattanayak, Dr. Satyajit/N-7366-2019; Saha, Dipankar/ISV-6097-2023	Saha, Dipankar/0000-0003-4289-9045; PATTANAYAK, Dr. SATYAJIT/0000-0001-9463-2102	Department of Biotechnology (DBT), Government of India [GAP 232512]	Department of Biotechnology (DBT), Government of India(Department of Biotechnology (DBT) India)	The authors acknowledge the funding from Department of Biotechnology (DBT), Government of India (Project No: GAP 232512) for financial support. The authors also express their since gratitude to the Director, CSIR-Central Mechanical Engineering Research Institute, Durgapur for his continuous support and encouragement.		48	3	3	8	38	ELSEVIER	AMSTERDAM	RADARWEG 29, 1043 NX AMSTERDAM, NETHERLANDS	2213-1388	2213-1396		SUSTAIN ENERGY TECHN	Sustain. Energy Technol. Assess.	JUN	2023	57
J	Wang, YZ; Li, YJ; Zhang, CX; Yang, LG; Fan, XX; Chu, LZ				Wang, Yuzhuo; Li, Yingjie; Zhang, Chunxiao; Yang, Liguo; Fan, Xiaoxu; Chu, Leizhe			A study on co-pyrolysis mechanisms of biomass and polyethylene via ReaxFF molecular dynamic simulation and density functional theory	PROCESS SAFETY AND ENVIRONMENTAL PROTECTION			English	Article						Waste plastics; Biomass; Co-pyrolysis; ReaxFF molecular dynamic; Density functional theory	TG-FTIR; OIL PRODUCTION; CELLULOSE; PLASTICS; LIGNIN; POLYPROPYLENE; SOFTWOOD; BEHAVIOR; WOOD; MD	Co-pyrolysis of biomass and waste plastics is a long-term strategy to achieve efficient waste management and generate valuable fuels. The cellulose and polyethylene were chosen as typical representatives for biomass and plastics in this work. Reactive force field molecular dynamic and density functional theory were employed to investigate the co-pyrolysis mechanism of cellulose and polyethylene w…	[Wang, Yuzhuo; Li, Yingjie; Zhang, Chunxiao] Shandong Univ, Sch Energy & Power Engn, Jinan 250061, Peoples R China; [Yang, Liguo; Fan, Xiaoxu] Qilu Univ Technol, Shandong Acad Sci, Shandong Prov Key Lab Biomass Gasificat Technol, Energy Inst, Jinan 250014, Peoples R China; [Chu, Leizhe] Shandong Environm Protect Ind Res Inst, Jinan 250101, Peoples R China	Shandong University; Qilu University of Technology	Li, YJ (corresponding author), Shandong Univ, Sch Energy & Power Engn, Jinan 250061, Peoples R China.	liyj@sdu.edu.cn	Yang, Liguo/GPG-3948-2022; xiaoxu, Fan/R-2932-2019		National Natural Science Foundation of China [51876105]; Shandong Provincial Natural Science Foundation [ZR2020KE042]	National Natural Science Foundation of China(National Natural Science Foundation of China (NSFC)); Shandong Provincial Natural Science Foundation(Natural Science Foundation of Shandong Province)	This work was financially supported by the National Natural Science Foundation of China (51876105) and Shandong Provincial Natural Science Foundation (ZR2020KE042). The scientific calculations in this paper have been done on the HPC Cloud Platform of Shandong University.		58	71	77	30	241	ELSEVIER	AMSTERDAM	RADARWEG 29, 1043 NX AMSTERDAM, NETHERLANDS	0957-5820	1744-3598		PROCESS SAF ENVIRON	Process Saf. Environ. Protect.	JUN	2021	150
J	Wee, MXJ; Chin, BLF; Saptoro, A; Yiin, CL; Chew, JJ; Sunarso, J; Yusup, S; Sharma, A				Wee, Melvin X. J.; Chin, Bridgid L. F.; Saptoro, Agus; Yiin, Chung L.; Chew, Jiuan J.; Sunarso, Jaka; Yusup, Suzana; Sharma, Abhishek			A review on co-pyrolysis of agriculture biomass and disposable medical face mask waste for green fuel production: recent advances and thermo-kinetic models	FRONTIERS OF CHEMICAL SCIENCE AND ENGINEERING			English	Review						biomass; COVID-19 waste; catalyst; pyrolysis; kinetics	CATALYTIC FAST PYROLYSIS; EMPTY FRUIT BUNCH; RENEWABLE ENERGY POLICIES; BIO-OIL; SEWAGE-SLUDGE; RICE HUSK; DENSITY POLYETHYLENE; MICROWAVE PYROLYSIS; PLASTIC WASTE; WOODY BIOMASS	The Association of Southeast Asian Nations is blessed with agricultural resources, and with the growing population, it will continue to prosper, which follows the abundance of agricultural biomass. Lignocellulosic biomass attracted researchers' interest in extracting bio-oil from these wastes. However, the resulting bio-oil has low heating values and undesirable physical properties. Hence, co-pyr…	[Wee, Melvin X. J.; Chin, Bridgid L. F.; Saptoro, Agus] Curtin Univ Malaysia, Fac Engn & Sci, Dept Chem & Energy Engn, CDT 250, Miri 98009, Malaysia; [Chin, Bridgid L. F.] Curtin Univ Malaysia, Fac Engn & Sci, Energy & Environm Res Cluster, CDT 250, Miri 98009, Malaysia; [Yiin, Chung L.] Univ Malaysia Sarawak, Fac Engn, Dept Chem Engn & Energy Sustainabil, Kota Samarahan 94300, Malaysia; [Yiin, C…	Curtin University Malaysia; Curtin University Malaysia; University of Malaysia Sarawak; University of Malaysia Sarawak; Swinburne University of Technology; Swinburne University of Technology Sarawak; Manipal University Jaipur; Royal Melbourne Institute of Technology (RMIT)	Chin, BLF (corresponding author), Curtin Univ Malaysia, Fac Engn & Sci, Dept Chem & Energy Engn, CDT 250, Miri 98009, Malaysia.;Chin, BLF (corresponding author), Curtin Univ Malaysia, Fac Engn & Sci, Energy & Environm Res Cluster, CDT 250, Miri 98009, Malaysia.	bridgidchin@curtin.edu.my	Yiin, Chung Loong/Q-8815-2019; Jing, Chew/X-9146-2019; Yusup, Suzana/F-8805-2012; Sharma, Avdhesh Kumar/JWA-4237-2024; Saptoro, Agus/AAG-6265-2019; Chin, Bridgid Lai Fui/I-2551-2018	Chin, Bridgid Lai Fui/0000-0002-6544-664X; yusup, suzana/0000-0003-4790-3613; Sharma, Abhishek/0000-0002-6539-8035	Curtin University Malaysia, Swinburne University of Technology, Universiti Teknologi PETRONAS (UTP); Manipal University Jaipur; Curtin Malaysia Postgraduate Research Studentship (CMPRS)	Curtin University Malaysia, Swinburne University of Technology, Universiti Teknologi PETRONAS (UTP); Manipal University Jaipur; Curtin Malaysia Postgraduate Research Studentship (CMPRS)	The authors would like to acknowledge the technical support from Curtin University Malaysia, Swinburne University of Technology, Universiti Teknologi PETRONAS (UTP), and Manipal University Jaipur. Besides that, M.X.J. Wee would like to acknowledge the full funding support from the Curtin Malaysia Postgraduate Research Studentship (CMPRS) for the PhD study.		141	9	9	7	46	SPRINGER	NEW YORK	ONE NEW YORK PLAZA, SUITE 4600, NEW YORK, NY, UNITED STATES	2095-0179	2095-0187		FRONT CHEM SCI ENG	Front. Chem. Sci. Eng.	SEP	2023	17	9
J	Zhang, HY; Xiao, R; Nie, JL; Jin, BS; Shao, SS; Xiao, GM				Zhang, Huiyan; Xiao, Rui; Nie, Jianlong; Jin, Baosheng; Shao, Shanshan; Xiao, Guomin			Catalytic pyrolysis of black-liquor lignin by co-feeding with different plastics in a fluidized bed reactor	BIORESOURCE TECHNOLOGY			English	Article						Biomass; Black-liquor lignin; Plastics; Catalytic co-pyrolysis; Fluidized bed	AROMATIC-HYDROCARBONS; BIOMASS; POLYETHYLENE; OLEFINS; POLYPROPYLENE; CONVERSION; WASTE; YIELD; FUELS	Catalytic co-pyrolysis of black-liquor lignin and waste plastics (polyethylene, PE; polypropylene PP; polystyrene, PS) was conducted in a fluidized bed. The effects of temperature, plastic to lignin ratio, catalyst and plastic types on product distributions were studied. Both aromatic and olefin yields increased with increasing PE proportion. Petrochemical yield of co-pyrolysis of PE and lignin w…	[Zhang, Huiyan; Xiao, Rui; Nie, Jianlong; Jin, Baosheng; Shao, Shanshan] Southeast Univ, Key Lab Energy Thermal Convers & Control, Minist Educ, Sch Energy & Environm, Nanjing 210096, Jiangsu, Peoples R China; [Xiao, Guomin] Southeast Univ, Sch Chem & Chem Engn, Nanjing 211189, Jiangsu, Peoples R China	Southeast University - China; Southeast University - China	Xiao, R (corresponding author), Southeast Univ, Key Lab Energy Thermal Convers & Control, Minist Educ, Sch Energy & Environm, Nanjing 210096, Jiangsu, Peoples R China.	ruixiao@seu.edu.cn	Zhang, Huiyan/A-8640-2011	Zhang, Huiyan/0000-0002-4818-7156	National Natural Science Foundation of China [51306036]; National Basic Research Program of China (973 Program) [2012CB215306]; Jiangsu Natural Science Foundation [BK20130615]	National Natural Science Foundation of China(National Natural Science Foundation of China (NSFC)); National Basic Research Program of China (973 Program)(National Basic Research Program of China); Jiangsu Natural Science Foundation(Natural Science Foundation of Jiangsu Province)	The authors acknowledge the financial support of the National Natural Science Foundation of China (Grant No. 51306036), the National Basic Research Program of China (973 Program, Grant 2012CB215306) and the Jiangsu Natural Science Foundation (Grant No. BK20130615).		30	134	145	11	253	ELSEVIER SCI LTD	OXFORD	THE BOULEVARD, LANGFORD LANE, KIDLINGTON, OXFORD OX5 1GB, OXON, ENGLAND	0960-8524	1873-2976		BIORESOURCE TECHNOL	Bioresour. Technol.	SEP	2015	192
J	Johansson, AC; Sandström, L; Öhrman, OGW; Jilvero, H				Johansson, Ann-Christine; Sandstrom, Linda; Ohrman, Olov G. W.; Jilvero, Henrik			Co-pyrolysis of woody biomass and plastic waste in both analytical and pilot scale	JOURNAL OF ANALYTICAL AND APPLIED PYROLYSIS			English	Article						Plastic waste; Biomass; Shredder light fraction; Paper reject; Cable plastics	BIO-OIL; CELLULOSE; POLYPROPYLENE; POLYETHYLENE; POLYSTYRENE; MIXTURES	Earlier studies show that co-pyrolysis of biomass and plastics can improve the quantity and quality of the produced pyrolysis oil compared to pyrolysis of the separate feedstocks. In this work three relevant plastic wastes; paper reject, shredder light fraction and cable plastics; were evaluated together with woody biomass (stem wood from spruce and pine) using analytical pyrolysis, Py-GC-MS/FID.…	[Johansson, Ann-Christine; Sandstrom, Linda; Ohrman, Olov G. W.] RISE Energy Technol Ctr AB, Box 726, SE-94128 Pitea, Sweden; [Ohrman, Olov G. W.] Lulea Univ Technol, SE-97187 Lulea, Sweden; [Jilvero, Henrik] Stena Metall, SE-40040 Gothenburg, Sweden	Lulea University of Technology	Johansson, AC (corresponding author), RISE Energy Technol Ctr AB, Box 726, SE-94128 Pitea, Sweden.	ann-christine.johansson@ri.se	Johansson, Ann-Christine/JKL-4516-2023	Sandstrom, Linda/0000-0002-8264-4736; Johansson, Ann-Christine/0000-0001-9126-0155; Ohrman, Olov/0000-0003-2324-4318	Swedish Energy Agency [42499-1]; FORMAS; Vinnova	Swedish Energy Agency(Swedish Energy Agency); FORMAS(Swedish Research Council Formas); Vinnova(Vinnova)	The project (project no. 42499-1) has been carried out within the strategic innovation program RE:Source financed by the Swedish Energy Agency, FORMAS and Vinnova and the project partners Smurfit Kappa and Stena Metall. The authors would like to thank Klaas van der Vlist, Smurfit Kappa, for contribution of valuable input to the project. Calle Ylipaa, Mathias Lundgren and Jimmy Narvesjo are acknow…		29	77	81	3	92	ELSEVIER	AMSTERDAM	RADARWEG 29, 1043 NX AMSTERDAM, NETHERLANDS	0165-2370	1873-250X		J ANAL APPL PYROL	J. Anal. Appl. Pyrolysis	SEP	2018	134
J	Navarro, MV; López, JM; Veses, A; Callén, MS; García, T				Navarro, M. V.; Lopez, J. M.; Veses, A.; Callen, M. S.; Garcia, T.			Kinetic study for the co-pyrolysis of lignocellulosic biomass and plastics using the distributed activation energy model	ENERGY			English	Article; Proceedings Paper	10th International Conference on Sustainable Energy and Environmental Protection (SEEP)	JUN 27-30, 2017	Univ W Scotland, Inst Engn & Energy Technologies, Bled, SLOVENIA	Univ Maribor, Fac Chem & Chemical Engn	Univ W Scotland, Inst Engn & Energy Technologies	Co-pyrolysis; Kinetics; DAEM; Biomass; Plastics	MUNICIPAL SOLID-WASTE; THERMOGRAVIMETRIC CHARACTERISTICS; POLYETHYLENE TEREPHTHALATE; THERMAL-DECOMPOSITION; CATALYTIC PYROLYSIS; PY-GC/MS; MIXTURES; BLENDS; GASIFICATION; POLYPROPYLENE	The characteristics of bio-oil produced from biomass pyrolysis can be improved by co-feeding waste materials. In this work, co-pyrolysis of lignocellulosic biomass with six different waste plastics (waste tyre ('NT), polylactic acid (PLA), polystyrene (PS), polyethylene terephthalate (PET), polypropylene (PP) and high density polyethylene (HDPE)) were conducted in a thermogravimetric analyser to …	[Navarro, M. V.; Lopez, J. M.; Veses, A.; Callen, M. S.; Garcia, T.] Inst Carboquim ICB CSIC, Environm & Energy Dept, C Miguel Luesma Castan 4, Zaragoza 50018, Spain	Consejo Superior de Investigaciones Cientificas (CSIC); CSIC - Instituto de Carboquimica (ICB)	Navarro, MV (corresponding author), Inst Carboquim ICB CSIC, Environm & Energy Dept, C Miguel Luesma Castan 4, Zaragoza 50018, Spain.	navarro@icb.csic.es	García, Tomás/D-2133-2011; Callen, M.S./H-3360-2015; Lopez Sebastian, Jose Manuel/B-5579-2015; Navarro, M Victoria/H-9719-2015	Callen, M.S./0000-0001-6063-7386; Lopez Sebastian, Jose Manuel/0000-0002-6203-8835; Navarro, M Victoria/0000-0002-4992-9019; Veses, Alberto/0000-0002-7589-2643	Spanish MINECO; European Union FEDER funds [ENE2015-68320-R]; Regional Government of Aragon (DGA) [T04_17R]	Spanish MINECO(Spanish Government); European Union FEDER funds(European Union (EU)); Regional Government of Aragon (DGA)(Gobierno de Aragon)	The authors wish to thank the Spanish MINECO and European Union FEDER funds (project ENE2015-68320-R) and the Regional Government of Aragon (DGA) for the research groups support programme (project T04_17R).		56	83	84	7	139	PERGAMON-ELSEVIER SCIENCE LTD	OXFORD	THE BOULEVARD, LANGFORD LANE, KIDLINGTON, OXFORD OX5 1GB, ENGLAND	0360-5442	1873-6785		ENERGY	Energy	DEC 15	2018	165		A
J	Yao, ZL; Kang, K; Cong, HB; Jia, JX; Huo, LL; Deng, Y; Xie, T; Zhao, LX				Yao, Zonglu; Kang, Kang; Cong, Hongbin; Jia, Jixiu; Huo, Lili; Deng, Yun; Xie, Teng; Zhao, Lixin			Demonstration and multi-perspective analysis of industrial-scale co-pyrolysis of biomass, waste agricultural film, and bituminous coal	JOURNAL OF CLEANER PRODUCTION			English	Article						Biomass; Plastic waste; Coal; Co-pyrolysis; Product characterization; Socioenvironmental analysis		The accumulation of waste biomass and plastic and the inefficient combustion of low-quality coal is a major cause of energy loss and air pollution in rural China. This paper reports for the first time an experimental and multi-perspective analysis on an industrial scale co-pyrolysis of waste biomass and plastic. The results show that the resulting biochar product had a low calorific value of >= 2…	[Yao, Zonglu; Jia, Jixiu; Huo, Lili; Deng, Yun; Xie, Teng; Zhao, Lixin] CAAS, Inst Environm & Sustainable Dev Agr, Beijing 100081, Peoples R China; [Cong, Hongbin] Minist Agr & Rural Affairs, Acad Agr Planning & Engn, Key Lab Energy Resource Utilizat Agr Residue, Beijing 100125, Peoples R China; [Kang, Kang] Western Univ, Inst Chem & Fuels Alternat Resources, London, ON, Canada	Chinese Academy of Agricultural Sciences; Institute of Environment & Sustainable Development in Agriculture, CAAS; Ministry of Agriculture & Rural Affairs; Western University (University of Western Ontario)	Zhao, LX (corresponding author), CAAS, Inst Environm & Sustainable Dev Agr, Beijing 100081, Peoples R China.;Kang, K (corresponding author), Western Univ, Inst Chem & Fuels Alternat Resources, London, ON, Canada.	kknwafu@hotmail.com; zhaolixincaas@163.com		KANG, KANG/0000-0002-7116-549X	Agricultural Science and Technology Innovation Program (CAAS-ASTIP), China Agriculture Research System [CARS-02]; Natural Science Basic Research Program of Shaanxi [2020JQ-243]; China Postdoctoral Science Foundation [2019M663831]; Academy of Agricultural Planning and Engineering, Key Laboratory of Energy Resource Utilization from Agriculture Residue, Ministry of Agriculture and Rural Affairs, Chi…	Agricultural Science and Technology Innovation Program (CAAS-ASTIP), China Agriculture Research System; Natural Science Basic Research Program of Shaanxi; China Postdoctoral Science Foundation(China Postdoctoral Science Foundation); Academy of Agricultural Planning and Engineering, Key Laboratory of Energy Resource Utilization from Agriculture Residue, Ministry of Agriculture and Rural Affairs, C…	The authors gratefully acknowledge the financial support from the Agricultural Science and Technology Innovation Program (CAAS-ASTIP), China Agriculture Research System (CARS-02), Natural Science Basic Research Program of Shaanxi [2020JQ-243], China Postdoctoral Science Foundation Grant [2019M663831], and the Academy of Agricultural Planning and Engineering, Key Laboratory of Energy Resource Util…		52	22	25	7	82	ELSEVIER SCI LTD	OXFORD	THE BOULEVARD, LANGFORD LANE, KIDLINGTON, OXFORD OX5 1GB, OXON, ENGLAND	0959-6526	1879-1786		J CLEAN PROD	J. Clean Prod.	MAR 25	2021	290
J	Chen, WH; Naveen, C; Ghodke, PK; Sharma, AK; Bobde, P				Chen, Wei-Hsin; Naveen, C.; Ghodke, Praveen Kumar; Sharma, Amit Kumar; Bobde, Prakash			Co-pyrolysis of lignocellulosic biomass with other carbonaceous materials: A review on advance technologies, synergistic effect, and future prospectus	FUEL			English	Review						Co -pyrolysis; Lignocellulosic biomass; Carbonaceous materials; Synergistic effect; Valorized products; Biofuel	HIGH-DENSITY POLYETHYLENE; BUBBLING FLUIDIZED-BED; BIO-OIL; SUGARCANE BAGASSE; RECENT PROGRESS; WASTE PLASTICS; SEWAGE-SLUDGE; POLYSTYRENE; FUEL; RECOVERY	Due to the continuous rise in population, modernization, and industrialization, the demand for energy is increasing day by day, resulting in serious issues such as fossil fuel depletion, pollution, and power shortages. As a result, there is an urgent need to investigate alternate energy sources. Lignocellulosic biomass pyrolysis has been shown as the most promising feedstock for the production of…	[Chen, Wei-Hsin] Natl Cheng Kung Univ, Dept Aeronaut & Astronaut, Tainan 701, Taiwan; [Chen, Wei-Hsin] Tunghai Univ, Res Ctr Smart Sustainable Circular Econ, Taichung 407, Taiwan; [Chen, Wei-Hsin] Natl Chin Yi Univ Technol, Dept Mech Engn, Taichung 411, Taiwan; [Naveen, C.] SRM Inst Sci & Technol, Dept Elect & Elect Engn, Kattankulathur 603203, Tamil Nadu, India; [Ghodke, Praveen Kumar] Natl Inst…	National Cheng Kung University; Tunghai University; National Chin-Yi University of Technology; SRM Institute of Science & Technology Chennai; National Institute of Technology (NIT System); National Institute of Technology Calicut; University of Petroleum & Energy Studies (UPES); University of Petroleum & Energy Studies (UPES)	Ghodke, PK (corresponding author), Natl Inst Technol Calicut, Dept Chem Engn, Kozhikode 673601, Kerala, India.;Sharma, AK (corresponding author), Univ Petr, Dept Chem, PO Bidholi Via Prem Nagar, Dehra Dun 248007, India.;Sharma, AK (corresponding author), Univ Petr & Energy Studies UPES Univ, Ctr Alternate Energy Res, PO Bidholi Via Prem Nagar, Dehra Dun 248007, India.	praveenkg@nitc.ac.in; amitsharma@ddn.upes.ac.in	Sharma, Ankit/JQW-9800-2023; C, NAVEEN/AAG-2909-2019; Bobde, Prakash/AAW-8073-2020; Ghodke, Praveen/AFM-7955-2022; Ghodke, Praveen/U-9547-2018	C, NAVEEN/0000-0002-7880-6747; Sharma, Amit/0000-0002-2353-2996; Ghodke, Praveen/0000-0003-3427-7481	Ministry of Science and Technology, Taiwan, R.O.C. [MOST 109-2221-E- 006-040-MY3, MOST 110-2622-E-006-001-CC1, MOST 110-3116- F-006-003]; Higher Education Sprout Project, Ministry of Education to the Headquarters of University Advancement at National Cheng Kung University (NCKU)	Ministry of Science and Technology, Taiwan, R.O.C.(Ministry of Science and Technology, Taiwan); Higher Education Sprout Project, Ministry of Education to the Headquarters of University Advancement at National Cheng Kung University (NCKU)	The authors are also thankful for Department of Chemical Engineering, NIT Calicut Kerala, SRM Institute of Science and Technology, Kattankulathur, Tamil Nadu and UPES R & D, Dehradun, Uttrakhand for their contnious support. The Ministry of Science and Technology, Taiwan, R.O.C.'s financial support under contracts MOST 109-2221-E- 006-040-MY3, MOST 110-2622-E-006-001-CC1, and MOST 110-3116- F-006-…		143	46	47	49	134	ELSEVIER SCI LTD	London	125 London Wall, London, ENGLAND	0016-2361	1873-7153		FUEL	Fuel	AUG 1	2023	345
J	Inayat, A; Rocha-Meneses, L; Ghenai, C; Abdallah, M; Shanableh, A; Al-Ali, K; Alghfeli, A; Alsuwaidi, R				Inayat, Abrar; Rocha-Meneses, Lisandra; Ghenai, Chaouki; Abdallah, Mohamed; Shanableh, Abdallah; Al-Ali, Khadija; Alghfeli, Amna; Alsuwaidi, Reem			Co-pyrolysis for bio-oil production via fixed bed reactor using date seeds and plastic waste as biomass	CASE STUDIES IN THERMAL ENGINEERING			English	Article						Co-pyrolysis; Biomass; Bio-oil; Date seeds; Plastic waste		The consumption of plastic bottles is relatively high in the United Arab Emirates (UAE). Therefore, in this study authors investigated the potential of combined plastic waste and locally available biomass (date seeds) to produce value-added products (bio-oil, bio-char and syngas) via pyrolysis process. The experiments were performed in a fixed bed pyrolizer, operated at different temperatures. Ex…	[Inayat, Abrar; Ghenai, Chaouki; Al-Ali, Khadija; Alghfeli, Amna; Alsuwaidi, Reem] Univ Sharjah, Dept Sustainable & Renewable Energy Engn, Sharjah, U Arab Emirates; [Inayat, Abrar; Rocha-Meneses, Lisandra; Ghenai, Chaouki; Abdallah, Mohamed] Univ Sharjah, Ctr Sustainable Energy & Power Syst Res, Res Inst Sci & Engn, Biomass & Bioenergy Res Grp, Sharjah 27272, U Arab Emirates; [Abdallah, Mohamed; …	University of Sharjah; University of Sharjah; University of Sharjah	Inayat, A (corresponding author), Univ Sharjah, Dept Sustainable & Renewable Energy Engn, Sharjah, U Arab Emirates.;Rocha-Meneses, L (corresponding author), Univ Sharjah, Ctr Sustainable Energy & Power Syst Res, Res Inst Sci & Engn, Biomass & Bioenergy Res Grp, Sharjah 27272, U Arab Emirates.	ainayat@sharjah.ac.ae; lmeneses@sharjah.ac.ae	Inayat, Abrar/H-6067-2011; Abdallah, Mohamed/AAP-7254-2020; Rocha Meneses, Prof. Lisandra/A-2368-2017	Shanableh, Abdallah/0000-0002-9808-4120; Rocha Meneses, Prof. Lisandra/0000-0003-1196-9522; Inayat, Abrar/0000-0003-3945-4926					31	26	27	4	32	ELSEVIER	AMSTERDAM	RADARWEG 29, 1043 NX AMSTERDAM, NETHERLANDS	2214-157X			CASE STUD THERM ENG	Case Stud. Therm. Eng.	MAR	2022	31
J	Potnuri, R; Rao, CS; Surya, DV; Kumar, A; Basak, T				Potnuri, Ramesh; Rao, Chinta Sankar; Surya, Dadi Venkata; Kumar, Abhishankar; Basak, Tanmay			Utilizing support vector regression modeling to predict pyro product yields from microwave-assisted catalytic co-pyrolysis of biomass and waste plastics	ENERGY CONVERSION AND MANAGEMENT			English	Article						Co-pyrolysis; Support vector regression; Machine learning; Biomass; Waste plastic; Microwave-assisted pyrolysis	BIO-OIL PRODUCTION; PROCESS PARAMETERS; HYDROTHERMAL LIQUEFACTION; DENSITY POLYETHYLENE; OPTIMIZATION; SUSCEPTOR; SHELL	The rise in plastic waste production has led to the development of co-pyrolysis of waste plastics and biomass as a potential solution. This process converts waste into valuable resources, including chemicals and pollutant-absorbing materials. Accurately predicting product yields is crucial and involves considering feedstock charac-teristics and pyrolysis conditions. No previous work on machine le…	[Potnuri, Ramesh; Rao, Chinta Sankar] Natl Inst Technol Karnataka, Dept Chem Engn, Surathkal 575025, India; [Surya, Dadi Venkata] Pandit Deendayal Energy Univ, Dept Chem Engn, Gandhinagar 382007, India; [Kumar, Abhishankar] MPM Infosoft Pvt Ltd, IIT Madras Res Pk, Chennai 600113, India; [Basak, Tanmay] Indian Inst Technol Madras, Dept Chem Engn, Chennai 600036, India	National Institute of Technology (NIT System); National Institute of Technology Karnataka; Pandit Deendayal Energy University; Indian Institute of Technology System (IIT System); Indian Institute of Technology (IIT) - Madras; Indian Institute of Technology System (IIT System); Indian Institute of Technology (IIT) - Madras	Rao, CS (corresponding author), Natl Inst Technol Karnataka, Dept Chem Engn, Surathkal 575025, India.	csrao@nitk.edu.in	Sankar Rao, Chinta/AAI-3081-2020; Basak, Tanmay/G-8818-2011; RAMESH, POTNURI/KHU-2599-2024	Sankar Rao, Chinta/0000-0002-3554-5006; RAMESH, POTNURI/0009-0008-2772-3838					62	30	33	28	92	PERGAMON-ELSEVIER SCIENCE LTD	OXFORD	THE BOULEVARD, LANGFORD LANE, KIDLINGTON, OXFORD OX5 1GB, ENGLAND	0196-8904	1879-2227		ENERG CONVERS MANAGE	Energy Conv. Manag.	SEP 15	2023	292
J	Zhang, XS; Lei, HW; Zhu, L; Zhu, XL; Qian, M; Yadavalli, G; Wu, J; Chen, SL				Zhang, Xuesong; Lei, Hanwu; Zhu, Lei; Zhu, Xiaolu; Qian, Moriko; Yadavalli, Gayatri; Wu, Joan; Chen, Shulin			Thermal behavior and kinetic study for catalytic co-pyrolysis of biomass with plastics	BIORESOURCE TECHNOLOGY			English	Article						Catalytic co-pyrolysis; Kinetics; TGA; Biomass; Plastics	FUEL RANGE ALKANES; THERMOGRAVIMETRIC CHARACTERISTICS; LIGNOCELLULOSIC BIOMASS; BIO-OIL; CELLULOSE; BLENDS; PRODUCTS; WASTE; ZSM-5; POLYETHYLENE	The present study aims to investigate the thermal decomposition behaviors and kinetics of biomass (cellulose/Douglas fir sawdust) and plastics (LDPE) in a non-catalytic and catalytic co-pyrolysis over ZSM-5 catalyst by using a thermogravimetric analyzer (TGA). It was found that there was a positive synergistic interaction between biomass and plastics according to the difference of weight loss (De…	[Zhang, Xuesong; Lei, Hanwu; Zhu, Lei; Zhu, Xiaolu; Qian, Moriko; Yadavalli, Gayatri; Wu, Joan; Chen, Shulin] Washington State Univ, Dept Biol Syst Engn, Richland, WA 99354 USA	Washington State University	Lei, HW (corresponding author), Washington State Univ, Dept Biol Syst Engn, Richland, WA 99354 USA.	hlei@wsu.edu	Lei, Hanwu/S-1122-2019; Zhang, Xuesong/JMQ-7240-2023; Zhu, Xiao/AAV-2637-2021; Chen, Shulin/GXG-9029-2022; Qian, Moriko/AAO-6176-2020	Zhang, Xuesong/0000-0001-5346-9636; Zhu, Lei/0000-0002-3323-6103	Agriculture and Food Research Initiative of National Institute of Food and Agriculture, United States Department of Agriculture [2015-67021-22911, 2016-67021-24533]; WSU Office of Commercialization; Washington Research foundation; Chinese Scholarship Council; Offices of the President and Provost; Vice President of Research	Agriculture and Food Research Initiative of National Institute of Food and Agriculture, United States Department of Agriculture; WSU Office of Commercialization; Washington Research foundation; Chinese Scholarship Council(China Scholarship Council); Offices of the President and Provost; Vice President of Research	This study was supported partially by the Agriculture and Food Research Initiative of National Institute of Food and Agriculture, United States Department of Agriculture (Award Number: 2015-67021-22911; Award Number: 2016-67021-24533), WSU Office of Commercialization and the Offices of the President and Provost in conjunction with the Vice President of Research, the Washington Research foundation…		31	165	184	22	301	ELSEVIER SCI LTD	OXFORD	THE BOULEVARD, LANGFORD LANE, KIDLINGTON, OXFORD OX5 1GB, OXON, ENGLAND	0960-8524	1873-2976		BIORESOURCE TECHNOL	Bioresour. Technol.	NOV	2016	220
J	Vo, TA; Tran, QK; Ly, HV; Kwon, B; Hwang, HT; Kim, J; Kim, SS				Thuan Anh Vo; Quoc Khanh Tran; Hoang Vu Ly; Kwon, Byeongwan; Hwang, Hyun Tae; Kim, Jinsoo; Kim, Seung-Soo			Co-pyrolysis of lignocellulosic biomass and plastics: A comprehensive study on pyrolysis kinetics and characteristics	JOURNAL OF ANALYTICAL AND APPLIED PYROLYSIS			English	Article						Co-pyrolysis; Kinetic triplet; Biomass; Plastics; Fixed-bed reactor	HIGH-DENSITY POLYETHYLENE; FLUIDIZED-BED; BIO-OIL; THERMOGRAVIMETRIC ANALYSIS; THERMAL-DECOMPOSITION; PART I; WASTE; POLYPROPYLENE; BEHAVIORS; CELLULOSE	Co-pyrolysis of biomass with plastics is an interesting research trend in improving both the yield and quality of oil products toward taking advantage of flexible material resources and sustainable fuel development. This study investigated the kinetic behaviors using thermogravimetric analysis and pyrolysis characterization for the co pyrolysis of biomass (bamboo and oak wood) with plastics (poly…	[Thuan Anh Vo; Quoc Khanh Tran; Hoang Vu Ly; Kwon, Byeongwan; Kim, Seung-Soo] Kangwon Natl Univ, Dept Chem Engn, 346 Joongang Ro, Samcheok 25913, Gangwon Do, South Korea; [Hoang Vu Ly; Kim, Jinsoo] Kyung Hee Univ, Dept Chem Engn Integrated Engn, 1732 Deogyeong Daero, Yongin 17104, Gyeonggi Do, South Korea; [Hwang, Hyun Tae] Univ Kentucky, Dept Chem & Mat Engn, 4810 Alben Barkley Dr, Paducah, KY 4…	Kangwon National University; Kyung Hee University; University of Kentucky	Kim, SS (corresponding author), Kangwon Natl Univ, Dept Chem Engn, 346 Joongang Ro, Samcheok 25913, Gangwon Do, South Korea.;Kim, J (corresponding author), Kyung Hee Univ, Dept Chem Engn Integrated Engn, 1732 Deogyeong Daero, Yongin 17104, Gyeonggi Do, South Korea.	jkim21@khu.ac.kr; sskim2008@kangwon.ac.kr	Kim, Jinsoo/G-6348-2012	Tran, Quoc Khanh/0000-0002-4742-1510	National Research Foundation of Korea (NRF) - Korea government (MSIT) [2020R1A2B5B01097547]; Engineering Research Center of Excellence Program of the Korea Ministry of Science, ICT & Future Planning (MSIP)/National Research Foundation of Korea (NRF) [NRF-2021R1A5A6002853]	National Research Foundation of Korea (NRF) - Korea government (MSIT)(National Research Foundation of KoreaMinistry of Science, ICT & Future Planning, Republic of KoreaMinistry of Science & ICT (MSIT), Republic of Korea); Engineering Research Center of Excellence Program of the Korea Ministry of Science, ICT & Future Planning (MSIP)/National Research Foundation of Korea (NRF)(National Research Fo…	This work was supported by the National Research Foundation of Korea (NRF) grant funded by the Korea government (MSIT) (No. 2020R1A2B5B01097547). This work was supported by the Engineering Research Center of Excellence Program of the Korea Ministry of Science, ICT & Future Planning (MSIP)/National Research Foundation of Korea (NRF) (Grant NRF-2021R1A5A6002853).		64	83	87	45	301	ELSEVIER	AMSTERDAM	RADARWEG 29, 1043 NX AMSTERDAM, NETHERLANDS	0165-2370	1873-250X		J ANAL APPL PYROL	J. Anal. Appl. Pyrolysis	MAY	2022	163
J	Ma, YJ; Wang, WL; Fu, YS; Miao, H; Huang, JL; Han, SZ; Chen, YT				Ma, Yujun; Wang, Wenliang; Fu, Yishuai; Miao, Hui; Huang, Jiale; Han, Sizhe; Chen, Yutong			A multifunctional SiC@HZSM-5@CoFe2O4 catalyst for synergistic co-pyrolysis of biomass and waste plastics by microwave irradiation	FUEL			English	Article						Microwave; Co-pyrolysis; Multifunctional Catalyst; Biomass; Waste Plastics	NI FOAM; ABSORPTION; POLYSTYRENE; AROMATICS	Improving the yield of the target product of monocyclic aromatic hydrocarbons plays an important role in increasing the economic competitiveness of biomass and waste plastics. In this study, a 3D SiC@HZSM5@CoFe2O4 multifunctional catalyst with high microwave absorptivity and excellent catalysis was successfully fabricated by a coating-coating method. Results showed that the obtained SiC@HZSM-5@Co…	[Ma, Yujun; Wang, Wenliang; Fu, Yishuai; Miao, Hui; Huang, Jiale; Han, Sizhe; Chen, Yutong] Shaanxi Univ Sci & Technol, Coll Bioresources Chem & Mat Engn, Coll Flexible Elect, Xian 710021, Peoples R China	Shaanxi University of Science & Technology	Wang, WL (corresponding author), Shaanxi Univ Sci & Technol, Coll Bioresources Chem & Mat Engn, Coll Flexible Elect, Xian 710021, Peoples R China.	wangwenliang@sust.edu.cn	Wu, Haiwei/ABO-8137-2022; Chen, Yutong/AAP-2214-2021; Ma, Yujun/F-8722-2014; Huang, Jiale/E-4834-2011	Wang, Wenliang/0000-0003-3357-7466	National Natural Science Foundation of China [31800497]	National Natural Science Foundation of China(National Natural Science Foundation of China (NSFC))	This work was financially supported by the National Natural Science Foundation of China (31800497) .		57	10	10	17	62	ELSEVIER SCI LTD	London	125 London Wall, London, ENGLAND	0016-2361	1873-7153		FUEL	Fuel	MAR 1	2024	359
J	Zhang, Y; Ahmad, MS; Shen, BX; Yuan, P; Shah, IA; Zhu, Q; Ibrahim, M; Bokhari, A; Klemes, JJ; Elkamel, A				Zhang, Yu; Ahmad, Muhammad Sajjad; Shen, Boxiong; Yuan, Peng; Shah, Imran Ali; Zhu, Qi; Ibrahim, Muhammad; Bokhari, Awais; Klemes, Jiri Jaromir; Elkamel, Ali			Co-pyrolysis of lychee and plastic waste as a source of bioenergy through kinetic study and thermodynamic analysis	ENERGY			English	Article						Lychee waste; Co -pyrolysis; Plastic waste; Thermodynamics parameters; Kinetic modelling	ACTIVATION-ENERGY; BIOMASS; GRASS; BEHAVIOR	The use of hazardous materials like plastic waste can be improved by adding value to viable biomass candidates. The current study is focused on lychee and plastic waste co-pyrolysis for the production of energy and chemicals. Based on this knowledge of the subject matter sample mixture was pyrolysed at four different heating rates: 10 degrees C min(-1), 20 degrees C min(-1), 30 degrees C min(-1),…	[Zhang, Yu; Ahmad, Muhammad Sajjad; Shen, Boxiong; Yuan, Peng; Shah, Imran Ali; Zhu, Qi] Hebei Univ Technol, Dept Chem Engn, Tianjin 300401, Peoples R China; [Ahmad, Muhammad Sajjad; Elkamel, Ali] Univ Waterloo, Dept Chem Engn, Waterloo, ON N2L 3G1, Canada; [Ibrahim, Muhammad] Govt Coll Univ Faisalabad, Dept Environm Sci & Engn, Faisalabad 38000, Pakistan; [Bokhari, Awais] COMSATS Univ Islamabad …	Hebei University of Technology; University of Waterloo; Government College University Faisalabad; COMSATS University Islamabad (CUI); Brno University of Technology	Ahmad, MS; Shen, BX (corresponding author), Hebei Univ Technol, Dept Chem Engn, Tianjin 300401, Peoples R China.	ms2ahmad@uwaterloo.ca; shenbx@hebut.edu.cn	Shah, Imran Ali/S-1440-2019; Klemes, Jiri/B-7291-2009; Bokhari, Dr. Awais/ABF-6997-2020; Zhu, Qi/KYR-6238-2024; Ibrahim, Muhammad/D-8635-2011; Shen, Boxiong/IZQ-5830-2023	Bokhari, Awais/0000-0002-0748-6336; Shah, Imran Ali/0000-0002-8082-9294; Shen, Boxiong/0000-0002-6119-2558; Ahmad, Muhammad Sajjad/0000-0002-8039-7559	National Natural Science Foundation of China [U20A20302]; Innovative group projects in Hebei Province [E2021202006]; Key R&D projects in Tianjin [19ZXSZSN00050, 19ZXSZSN00070]; Key R&D projects in Hebei Province [20373701D]; Project of great transformation of scientific and technical research in Hebei Province [21283701Z]; project Sustainable Process Integration Laboratory e SPIL [CZ.02.1.01/0.0/…	National Natural Science Foundation of China(National Natural Science Foundation of China (NSFC)); Innovative group projects in Hebei Province; Key R&D projects in Tianjin; Key R&D projects in Hebei Province; Project of great transformation of scientific and technical research in Hebei Province; project Sustainable Process Integration Laboratory e SPIL; Operational Programme Research, Development…	The research was supported by Joint Funds of the National Natural Science Foundation of China (U20A20302), Innovative group projects in Hebei Province (E2021202006), Key R&D projects in Tianjin (19ZXSZSN00050, 19ZXSZSN00070), Key R&D projects in Hebei Province (20373701D), and Project of great transformation of scientific and technical research in Hebei Province (21283701Z). This research has bee…		47	28	28	9	36	PERGAMON-ELSEVIER SCIENCE LTD	OXFORD	THE BOULEVARD, LANGFORD LANE, KIDLINGTON, OXFORD OX5 1GB, ENGLAND	0360-5442	1873-6785		ENERGY	Energy	OCT 1	2022	256
J	Guo, SH; Wang, ZW; Chen, GF; Zhang, MJ; Sun, TL; Wang, Q; Du, ZM; Chen, Y; Wu, MG; Li, ZF; Lei, TZ; Burra, KRG; Gupta, AK				Guo, Shuaihua; Wang, Zhiwei; Chen, Gaofeng; Zhang, Mengju; Sun, Tanglei; Wang, Qun; Du, Zhimin; Chen, Yan; Wu, Mengge; Li, Zaifeng; Lei, Tingzhou; Burra, Kiran R. G.; Gupta, Ashwani K.			Co-pyrolysis characteristics of forestry and agricultural residues and waste plastics: Thermal decomposition and products distribution	PROCESS SAFETY AND ENVIRONMENTAL PROTECTION			English	Article						Forestry residue; Agricultural residue; Waste plastics; Co-pyrolysis; Product characteristics	DENSITY POLYETHYLENE; BIOMASS PYROLYSIS; BIO-OIL; ENERGY; GASIFICATION; FUEL; POLYPROPYLENE; POLYSTYRENE; MECHANISMS; GENERATION	Co-pyrolysis technology is an important realizable pathway for efficient resource utilization of different kinds of organic solid wastes. Thermogravimetric analysis (TGA), Fourier transform infrared spectrometer (FTIR), and pyrolyze coupled with gas chromatography/mass spectrometry (Py-GC/MS) were used to examine the thermal decomposition behavior, pyrolysis performance, and products distribution…	[Guo, Shuaihua; Wang, Zhiwei; Wang, Qun; Du, Zhimin; Chen, Yan; Wu, Mengge] Henan Univ Technol, Sch Environm Engn, Zhengzhou 450001, Peoples R China; [Guo, Shuaihua; Wang, Zhiwei; Wang, Qun; Du, Zhimin; Chen, Yan; Wu, Mengge] Henan Univ Technol, Inst Carbon Neutral, Zhengzhou 450001, Peoples R China; [Chen, Gaofeng] Xiamen Univ, Coll Energy, Xiamen 361102, Peoples R China; [Zhang, Mengju; Li, Zai…	Henan University of Technology; Henan University of Technology; Xiamen University; Henan Academy of Sciences; Changzhou University; University System of Maryland; University of Maryland College Park	Wang, ZW (corresponding author), Henan Univ Technol, Sch Environm Engn, Zhengzhou 450001, Peoples R China.;Lei, TZ (corresponding author), Changzhou Univ, Inst Urban & Rural Min, Changzhou 213164, Peoples R China.;Gupta, AK (corresponding author), Univ Maryland, Dept Mech Engn, Combust Lab, College Pk, MD 20742 USA.	bioenergy@163.com; china_newenergy@163.com; akgupta@umd.edu	Wang, Zhi-Wei/P-1561-2018; Wang, Qunsheng/X-1015-2019	Gupta, Ashwani/0000-0001-8047-8706	National Natural Science Founda-tion of China [52276181]; China National Key Research and Develop-ment Projects [2019YFB1503903, 2018YFB1501403, 2019YFD1100604]; Henan Province Talent Project [194200510028]	National Natural Science Founda-tion of China(National Natural Science Foundation of China (NSFC)); China National Key Research and Develop-ment Projects; Henan Province Talent Project	Acknowledgments This study was supported by the National Natural Science Founda-tion of China (52276181) , China National Key Research and Develop-ment Projects (2019YFB1503903, 2018YFB1501403, 2019YFD1100604) , and Henan Province Talent Project (194200510028) . Their support is gratefully acknowledged.		49	27	27	19	77	ELSEVIER	AMSTERDAM	RADARWEG 29, 1043 NX AMSTERDAM, NETHERLANDS	0957-5820	1744-3598		PROCESS SAF ENVIRON	Process Saf. Environ. Protect.	SEP	2023	177
J	Stancin, H; Strezov, V; Mikulcic, H				Stancin, Hrvoje; Strezov, Vladimir; Mikulcic, Hrvoje			Life cycle assessment of alternative fuel production by co-pyrolysis of waste biomass and plastics	JOURNAL OF CLEANER PRODUCTION			English	Article						Co-pyrolysis; Waste plastic; Biomass; Life cycle assessment; Environmental impact	BIO-OIL; GAS	In the scope of energy transition and overall decarbonisation, various alternative fuels are investigated as po-tential substitutes for conventional fossil fuels. Co-pyrolysis has emerged as a potential solution for production of alternative fuels, while dealing with waste management issues, due to its ability to process different feedstocks. Biomass-derived fuels, with all their constraints, are…	[Stancin, Hrvoje; Strezov, Vladimir] Macquarie Univ, Fac Sci & Engn, Sch Nat Sci, Sydney, NSW 2109, Australia; [Stancin, Hrvoje; Mikulcic, Hrvoje] Univ Zagreb, Fac Mech Engn & Naval Architecture, Zagreb, Croatia	Macquarie University; University of Zagreb; University of Zagreb Faculty of Mechanical Engineering & Naval Architecture	Mikulcic, H (corresponding author), Univ Zagreb, Fac Mech Engn & Naval Architecture, Zagreb, Croatia.	hrvoje.stancin@fsb.hr; vladimir.strezov@mq.edu.au; hrvoje.mikulcic@fsb.hr	Stančin, Hrvoje/AAB-6854-2020; Strezov, Vladimir/J-4827-2019	Strezov, Vladimir/0000-0002-9129-9284					46	24	24	14	61	ELSEVIER SCI LTD	London	125 London Wall, London, ENGLAND	0959-6526	1879-1786		J CLEAN PROD	J. Clean Prod.	AUG 15	2023	414
J	Sajdak, M; Muzyka, R				Sajdak, M.; Muzyka, R.			Use of plastic waste as a fuel in the co-pyrolysis of biomass. Part I: The effect of the addition of plastic waste on the process and products	JOURNAL OF ANALYTICAL AND APPLIED PYROLYSIS			English	Article						Biochar; Biomass; Solid fuels properties; Plastics waste; Elemental analysis	WOOD BIOMASS	The aim of this study was to investigate the effects of using polypropylene, a common polymer used in the polymer industry, in the co-pyrolysis of two types of biomass. This study is crucial because different types of biomass exhibit different behaviours, which are mainly influenced by the chemical composition of the material (amount of cellulose, lignocellulose and hemicellulose). In our previou…	[Sajdak, M.; Muzyka, R.] Inst Chem Proc Coal, PL-41803 Zabrze, Poland	Institute for Chemical Processing of Coal	Sajdak, M (corresponding author), Inst Chem Proc Coal, 1 Zamkowa St, PL-41803 Zabrze, Poland.	msajdak@ichpw.zabrze.pl	Sajdak, Marcin/LLK-6607-2024; Sajdak, Marcin/C-9554-2019	Sajdak, Marcin/0000-0001-6037-7748; Muzyka, Roksana/0000-0002-6722-9710	Development of integrated technology of fuels and energy from biomass, agricultural waste, and others as part of the strategic programme of research and development: advanced technology of obtaining energy [4]	Development of integrated technology of fuels and energy from biomass, agricultural waste, and others as part of the strategic programme of research and development: advanced technology of obtaining energy	These studies were co-funded under the budget of research task No. 4 Development of integrated technology of fuels and energy from biomass, agricultural waste, and others as part of the strategic programme of research and development: advanced technology of obtaining energy provided by the NCBiR (SP/E/4/65786/10).		19	97	103	0	80	ELSEVIER	AMSTERDAM	RADARWEG 29, 1043 NX AMSTERDAM, NETHERLANDS	0165-2370	1873-250X		J ANAL APPL PYROL	J. Anal. Appl. Pyrolysis	MAY	2014	107
J	Xuan, WW; Cao, CY; Dong, YW; Xia, DH				Xuan, Weiwei; Cao, Chun Yan; Dong, Yanwu; Xia, Dehong			Exploration of the synergistic effect of co-pyrolysis of biomass and waste plastics based on ReaxFF-MD and DFT	JOURNAL OF THE ENERGY INSTITUTE			English	Article						Biomass; Plastics; ReaxFF-MD; Co-pyrolysis; Synergistic effect; Reaction mechanism	HIGH-DENSITY POLYETHYLENE; REACTIVE FORCE-FIELD; CELLULOSE; POLYSTYRENE; MECHANISMS; MIXTURES; PRODUCTS; SHELL; CHAR; WOOD	Co-pyrolysis of biomass and waste plastics is a strategy to achieve efficient waste management and obtain valuable fuels. In this paper, cellulose (CE) and polyethylene (PE) were chosen as representatives of biomass and plastics to investigate the synergistic effects of the main products during co-pyrolysis. The synergistic mechanisms are clarified at the microscopic level by ReaxFF-MD. Mainly, t…	[Xuan, Weiwei; Cao, Chun Yan; Dong, Yanwu; Xia, Dehong] Univ Sci & Technol Beijing, Sch Energy & Environm Engn, Beijing 100083, Peoples R China; [Xuan, Weiwei] Tsinghua Univ, Key Lab Thermal Sci & Power Engn, Minist Educ, Beijing 100084, Peoples R China	University of Science & Technology Beijing; Tsinghua University	Xuan, WW (corresponding author), Univ Sci & Technol Beijing, Sch Energy & Environm Engn, Beijing 100083, Peoples R China.	xww@ustb.edu.cn	Chunyan, Cao/X-7912-2019		National Natural Science Foundation of China [52276098]; Fundamental Research Funds for the Central Universities [FRF-IDRY-22-001]	National Natural Science Foundation of China(National Natural Science Foundation of China (NSFC)); Fundamental Research Funds for the Central Universities(Fundamental Research Funds for the Central Universities)	Acknowledgement This work is supported by the National Natural Science Foundation of China (52276098) and the Fundamental Research Funds for the Central Universities (FRF-IDRY-22-001) .		48	8	8	28	77	ELSEVIER SCI LTD	London	125 London Wall, London, ENGLAND	1743-9671	1746-0220		J ENERGY INST	J. Energy Inst.	DEC	2023	111
J	Burra, KG; Gupta, AK				Burra, K. G.; Gupta, A. K.			Kinetics of synergistic effects in co-pyrolysis of biomass with plastic wastes	APPLIED ENERGY			English	Article						Lignocellulose; Polycarbonate; Polyethylene terephthalate; Polypropylene; Distributed activation energy model (DAEM); Synergistic co-pyrolysis of biomass and plastics	THERMAL-DECOMPOSITION; STEAM GASIFICATION; HYDROGEN-PRODUCTION; POLYETHYLENE; CELLULOSE; SYNGAS; BEHAVIOR; MODEL	Co-pyrolysis of pinewood and different kinds of plastic wastes in different mass fractions using polypropylene (PP), polyethylene terephthalate (PETE), and polycarbonate (BPC) were investigated. The results compared with the pyrolysis of individual components revealed non-additive synergistic effects from co-pyrolysis. Differential thermography (DTG) results showed enhanced decomposition peaks of…	[Burra, K. G.; Gupta, A. K.] Univ Maryland, Dept Mech Engn, College Pk, MD 20742 USA	University System of Maryland; University of Maryland College Park	Gupta, AK (corresponding author), Univ Maryland, Dept Mech Engn, College Pk, MD 20742 USA.	akgupta@umd.edu		Burra, Kiran Raj Goud/0000-0002-5259-490X; Gupta, Ashwani/0000-0001-8047-8706	Office of Naval Research (ONR)	Office of Naval Research (ONR)(United States Department of DefenseUnited States NavyOffice of Naval Research)	The research support for this work from the Office of Naval Research (ONR) is gratefully acknowledged.		34	226	242	21	303	ELSEVIER SCI LTD	OXFORD	THE BOULEVARD, LANGFORD LANE, KIDLINGTON, OXFORD OX5 1GB, OXON, ENGLAND	0306-2619	1872-9118		APPL ENERG	Appl. Energy	JUN 15	2018	220
J	Mishra, R; Ong, HC; Lin, CW				Mishra, Rahul; Ong, Hwai Chyuan; Lin, Chi -Wen			Progress on co-processing of biomass and plastic waste for hydrogen production	ENERGY CONVERSION AND MANAGEMENT			English	Review						Co-pyrolysis; Co-gasification; Biomass; Plastic waste; Hydrogen energy; Alternative fuel	HIGH-DENSITY POLYETHYLENE; LIFE-CYCLE ASSESSMENT; H-2-RICH SYNGAS PRODUCTION; TECHNOECONOMIC ANALYSIS; STEAM GASIFICATION; RICH GAS; LIGNOCELLULOSIC BIOMASS; THERMAL-BEHAVIOR; FAST PYROLYSIS; WOOD WASTE	Sustainable energy sources are a solution to the increase in energy demand as a result of population growth. Pyrolysis and gasification are thermochemical processing techniques that can be used to convert biomass and plastic waste into energy. Co-processing (co-pyrolysis or co-gasification) has been identified as one of the major thermal techniques, which provides a significant framework for conv…	[Mishra, Rahul; Lin, Chi -Wen] Natl Yunlin Univ Sci & Technol, Dept Safety Hlth & Environm Engn, Touliu 64002, Taiwan; [Mishra, Rahul; Ong, Hwai Chyuan] Natl Yunlin Univ Sci & Technol, Future Technol Res Ctr, Touliu 64002, Taiwan; [Lin, Chi -Wen] Natl Yunlin Univ Sci & Technol, Grad Sch Engn Sci & Technol, Yunlin 64002, Taiwan	National Yunlin University Science & Technology; National Yunlin University Science & Technology; National Yunlin University Science & Technology	Ong, HC (corresponding author), Natl Yunlin Univ Sci & Technol, Future Technol Res Ctr, Touliu 64002, Taiwan.	onghc@yuntech.edu.tw	Ong, Hwai Chyuan/A-9492-2013; Lin, Chung-Ying/I-5434-2016; Mishra, Rahul/AGF-0379-2022	Mishra, Rahul/0000-0001-8857-1331	National Yunlin University of Science and Technology; Fengtay Cultural and Educational Foundation	National Yunlin University of Science and Technology; Fengtay Cultural and Educational Foundation	Authors would like to acknowledge the support of National Yunlin University of Science and Technology, and The Fengtay Cultural and Educational Foundation.		147	37	37	38	163	PERGAMON-ELSEVIER SCIENCE LTD	OXFORD	THE BOULEVARD, LANGFORD LANE, KIDLINGTON, OXFORD OX5 1GB, ENGLAND	0196-8904	1879-2227		ENERG CONVERS MANAGE	Energy Conv. Manag.	MAY 15	2023	284
J	Zhang, LB; Bao, ZH; Xia, SX; Lu, Q; Walters, KB				Zhang, Laibao; Bao, Zhenghong; Xia, Shunxiang; Lu, Qiang; Walters, Keisha B.			Catalytic Pyrolysis of Biomass and Polymer Wastes	CATALYSTS			English	Review						pyrolysis; catalyst; biomass; waste plastics; waste tires; bio-oil; zeolites; coke; co-pyrolysis	FLUIDIZED-BED REACTOR; FAST CO-PYROLYSIS; CELLULOSE-LIGNIN INTERACTIONS; MICROWAVE-ASSISTED PYROLYSIS; IMPROVING HYDROCARBON YIELD; CHEMICAL LIQUID DEPOSITION; HIGH-DENSITY POLYETHYLENE; MODIFIED ZSM-5 CATALYST; BIO-OIL PRODUCTION; IN-SITU	Oil produced by the pyrolysis of biomass and co-pyrolysis of biomass with waste synthetic polymers has significant potential as a substitute for fossil fuels. However, the relatively poor properties found in pyrolysis oil-such as high oxygen content, low caloric value, and physicochemical instability-hampers its practical utilization as a commercial petroleum fuel replacement or additive. This re…	[Zhang, Laibao] Louisiana State Univ, Cain Dept Chem Engn, Baton Rouge, LA 70803 USA; [Bao, Zhenghong] Oak Ridge Natl Lab, Chem Sci Div, Oak Ridge, TN 37830 USA; [Bao, Zhenghong] Oak Ridge Natl Lab, Ctr Nanophase Mat Sci, Oak Ridge, TN 37830 USA; [Xia, Shunxiang] Univ Minnesota, Dept Bioprod & Biosyst Engn, St Paul, MN 55108 USA; [Lu, Qiang] North China Elect Power Univ, Natl Engn Lab Biomass Pow…	Louisiana State University System; Louisiana State University; United States Department of Energy (DOE); Oak Ridge National Laboratory; United States Department of Energy (DOE); Oak Ridge National Laboratory; Center for Nanophase Materials Sciences; University of Minnesota System; University of Minnesota Twin Cities; North China Electric Power University; University of Oklahoma System; University…	Walters, KB (corresponding author), Univ Oklahoma, Sch Chem Biol & Mat Engn, Norman, OK 73019 USA.	laibaozhang21@gmail.com; baozh166@gmail.com; shunxiang.xia@gmail.com; qianglu@mail.ustc.edu.cn; keisha.walters@ou.edu	Zhang, Laibao/AAT-4288-2021; xia, shunxiang/Y-9839-2018; Walters, Keisha/HTL-6118-2023; Lu, Qiang/W-5558-2018	Walters, Keisha/0000-0002-0875-2659; Lu, Qiang/0000-0002-4340-1803; Zhang, Laibao/0000-0002-2325-5124; Bao, Zhenghong/0000-0002-4615-9741; Xia, Shunxiang/0000-0002-1976-1892					277	113	118	15	198	MDPI	BASEL	ST ALBAN-ANLAGE 66, CH-4052 BASEL, SWITZERLAND		2073-4344		CATALYSTS	Catalysts	DEC	2018	8	12
J	Jin, QM; Wang, XB; Li, SS; Mikulcic, H; Besenic, T; Deng, SH; Vujanovic, M; Tan, HZ; Kumfer, BM				Jin, Qiming; Wang, Xuebin; Li, Shuaishuai; Mikulcic, Hrvoje; Besenic, Tibor; Deng, Shuanghui; Vujanovic, Milan; Tan, Houzhang; Kumfer, Benjamin M.			Synergistic effects during co-pyrolysis of biomass and plastic: Gas, tar, soot, char products and thermogravimetric study	JOURNAL OF THE ENERGY INSTITUTE			English	Article						Plastic; Biomass; Co-pyrolysis; Synergistic effect; Soot	PART 1; COMBUSTION; TEMPERATURE; EVOLUTION; CELLULOSE; SYSTEM; SLUDGE; WASTE; TIME	Synergistic effects of biomass and plastic co-pyrolysis on gas, tar, soot and char production and pyrolysis kinetics were studied using a fixed-bed reactor and a thermogravimetric analyzer, respectively. These pyrolysis products' yields and compositions were measured during the individual pyrolysis of biomass and plastic at 800-1100 degrees C, and synergistic effects were explored under non-sooty…	[Jin, Qiming; Wang, Xuebin; Li, Shuaishuai; Deng, Shuanghui; Tan, Houzhang] Xi An Jiao Tong Univ, MOE Key Lab Thermofluid Sci & Engn, Xian 710049, Shaanxi, Peoples R China; [Mikulcic, Hrvoje; Besenic, Tibor; Vujanovic, Milan] Univ Zagreb, Fac Mech Engn & Naval Architecture, Zagreb 10000, Croatia; [Kumfer, Benjamin M.] Washington Univ, Dept Energy Environm & Chem Engn, St Louis, MO 63130 USA	Xi'an Jiaotong University; University of Zagreb; University of Zagreb Faculty of Mechanical Engineering & Naval Architecture; Washington University (WUSTL)	Wang, XB (corresponding author), Xi An Jiao Tong Univ, MOE Key Lab Thermofluid Sci & Engn, Xian 710049, Shaanxi, Peoples R China.	wxb005@mail.xjtu.edu.cn	Wang, Xuebin/C-7203-2015	Wang, Xuebin/0000-0003-4270-7330	National Natural Science Foundation of China [51676157, 5161101654]; National Key Research and Development Program of China [2016YFC0801904]; Fundamental Research Funds for the Central Universities	National Natural Science Foundation of China(National Natural Science Foundation of China (NSFC)); National Key Research and Development Program of China(National Key Research & Development Program of China); Fundamental Research Funds for the Central Universities(Fundamental Research Funds for the Central Universities)	The authors gratefully acknowledge the financial support of the National Natural Science Foundation of China (Nos. 51676157 and 5161101654), the National Key Research and Development Program of China (No. 2016YFC0801904), and the Fundamental Research Funds for the Central Universities. We would also like to thank Prof. Richard L. Axelbaum at Washington University in St. Louis for the valuable dis…		40	106	107	17	259	ELSEVIER SCI LTD	OXFORD	THE BOULEVARD, LANGFORD LANE, KIDLINGTON, OXFORD OX5 1GB, OXON, ENGLAND	1743-9671	1746-0220		J ENERGY INST	J. Energy Inst.	FEB	2019	92	1
J	Muzyka, R; Galko, G; Ouadi, M; Sajdak, M				Muzyka, Roksana; Galko, Grzegorz; Ouadi, Miloud; Sajdak, Marcin			Impact of Plastic Blends on the Gaseous Product Composition from the Co-Pyrolysis Process	ENERGIES			English	Article						ANOVA; biomass; co-pyrolysis; DoE; hydrogen; plastic waste blends	HIGH-DENSITY POLYETHYLENE; MUNICIPAL SOLID-WASTE; THERMAL-DEGRADATION; CATALYTIC PYROLYSIS; MIXED-PLASTICS; PART I; BIOMASS; FUEL; REACTOR; MIXTURES	The co-pyrolysis of various biomasses mixed with two types of plastic waste was investigated in this study. Mixture M1 consisted of 30% m/m styrene-butadiene rubber (SBR), 40% m/m polyethylene terephthalate (PET), and 30% m/m polypropylene (PP). M2 consisted of 40% m/m PET, 30% m/m PP, and 30% m/m acrylonitrile-butadiene-styrene copolymer (ABS). The SBR, ABS, and PP used in this study were from t…	[Muzyka, Roksana; Sajdak, Marcin] Silesian Univ Technol Gliwice, Fac Energy & Environm Engn, Dept Air Protect, PL-44100 Gliwice, Poland; [Galko, Grzegorz] Inst Energy & Fuel Proc Technol, 1 Zamkowa, PL-41803 Zabrze, Poland; [Ouadi, Miloud] Univ Birmingham, Sch Chem Engn, Birmingham B15 2TT, England	Silesian University of Technology; University of Birmingham	Sajdak, M (corresponding author), Silesian Univ Technol Gliwice, Fac Energy & Environm Engn, Dept Air Protect, PL-44100 Gliwice, Poland.;Ouadi, M (corresponding author), Univ Birmingham, Sch Chem Engn, Birmingham B15 2TT, England.	m.ouadi@bham.ac.uk; marcin.sajdak@polsl.pl	Sajdak, Marcin/LLK-6607-2024; Gałko, Grzegorz/HGB-7710-2022; Sajdak, Marcin/C-9554-2019	Muzyka, Roksana/0000-0002-6722-9710; Sajdak, Marcin/0000-0001-6037-7748; Galko, Grzegorz/0000-0003-2260-5564; Ouadi, Miloud/0000-0003-1575-3163					61	4	4	4	36	MDPI	BASEL	ST ALBAN-ANLAGE 66, CH-4052 BASEL, SWITZERLAND		1996-1073		ENERGIES	Energies	JAN	2023	16	2
J	Muniyappan, D; Lima, GR; Pereira, AO Jr; Gopi, R; Ramanathan, A				Muniyappan, Dineshkumar; Lima, Guilherme Rodrigues; Pereira Junior, Amaro Olimpio; Gopi, R.; Ramanathan, Anand			Multivariate combined optimization strategy and comparative life-cycle assessment of biomass and plastic residues via microwave co-pyrolysis approach towards a sustainable synthesis of renewable hydrocarbon fuel	JOURNAL OF ENVIRONMENTAL CHEMICAL ENGINEERING			English	Article						Microwave pyrolysis; Biomass; Plastic; Artificial neural network; Response surface methodology; Life cycle assessment	MUNICIPAL SOLID-WASTE; BIO-OIL; TO-ENERGY; ASSISTED PYROLYSIS; ELECTRONIC WASTE; TECHNOLOGIES; POLYSTYRENE; TEMPERATURE; MACROALGAE; RECOVERY	The present study revealed the optimum co-pyrolysis process condition and simultaneously evaluated the environmental impact potential during co-valorisation of electronic plastic waste (WEEP) with Hydnocarpus de-oiled seed cake (HDSC) to produce renewable hydrocarbon fuel. In this work, the primary co-pyrolysis process parameters such as operating temperature, mixture ratio, and catalyst loading …	[Muniyappan, Dineshkumar; Gopi, R.; Ramanathan, Anand] Natl Inst Technol, Dept Mech Engn, Bio Energy Lab, Tiruchirappalli 620015, India; [Lima, Guilherme Rodrigues; Pereira Junior, Amaro Olimpio] Univ Fed Rio de Janeiro, Inst Grad Studies Engn Alberto Luiz Coimbra, Energy Planning Programme PPE, Rio De Janeiro, Brazil	National Institute of Technology (NIT System); National Institute of Technology Tiruchirappalli; Universidade Federal do Rio de Janeiro	Ramanathan, A (corresponding author), Natl Inst Technol, Dept Mech Engn, Bio Energy Lab, Tiruchirappalli 620015, India.	anandachu@nitt.edu	Pereira, Amaro/J-3067-2018; R, gopi/GRF-0149-2022	R, Gopi/0000-0003-4394-6771; Pereira Jr, Amaro Olimpio/0000-0001-9766-1080	Scheme for Promotion of Academic and Research Collaboration, MHRD, India [SPARC/2018 -2019/P965/SL]	Scheme for Promotion of Academic and Research Collaboration, MHRD, India	The authors would like to extend their gratitude to the Scheme for Promotion of Academic and Research Collaboration, MHRD, India (Project no. SPARC/2018 -2019/P965/SL) for partly funding this project work. The authors further express sincere thanks to the director of the National Institute of Technology, Tiruchirappalli, for allowing us to conduct this research work at the institute.		59	7	7	12	29	ELSEVIER SCI LTD	London	125 London Wall, London, ENGLAND	2213-2929	2213-3437		J ENVIRON CHEM ENG	J. Environ. Chem. Eng.	DEC	2023	11	6
J	Li, ZY; Zhong, ZP; Zhang, B; Wang, W; Seufitelli, GVS; Resende, FLP				Li, Zhaoying; Zhong, Zhaoping; Zhang, Bo; Wang, Wei; Seufitelli, Gabriel V. S.; Resende, Fernando L. P.			Catalytic fast co-pyrolysis of waste greenhouse plastic films and rice husk using hierarchical micro-mesoporous composite molecular sieve	WASTE MANAGEMENT			English	Article						Catalytic fast co-pyrolysis; Composite molecular sieve; Rice husk; Waste greenhouse plastic films; Bio-oil	BIO-OIL PRODUCTION; AROMATIC-HYDROCARBONS; FOOD WASTE; BIOMASS; LIGNIN; BAMBOO; POLYGENERATION; YIELD; ZSM-5; BED	Catalytic fast co-pyrolysis of waste greenhouse plastic films and rice husk over a hierarchical HZSM-5/MCM-41 catalyst was performed in an analytical Py-GC/MS. We evaluated the effect of pyrolysis temperature and the ratio of rice husk to waste greenhouse plastic films on the total peak area of condensable organic products and CO2. In order to evaluate synergy possibilities among the two feedstoc…	[Li, Zhaoying; Zhong, Zhaoping; Zhang, Bo; Wang, Wei] Southeast Univ, Key Lab Energy Thermal Convers & Control, Minist Educ, Sch Energy & Environm, Nanjing 210096, Peoples R China; [Li, Zhaoying; Seufitelli, Gabriel V. S.] Univ Washington, Sch Environm & Forest Sci, Seattle, WA 98195 USA; [Resende, Fernando L. P.] Univ Texas Tyler, Jasper Dept Chem Engn, Tyler, TX 75799 USA	Southeast University - China; University of Washington; University of Washington Seattle; University of Texas System; University of Texas at Tyler	Zhong, ZP (corresponding author), Southeast Univ, Key Lab Energy Thermal Convers & Control, Minist Educ, Sch Energy & Environm, Nanjing 210096, Peoples R China.	zzhong@seu.edu.cn; fresende@uttyler.edu	Zhang, Bo/IZQ-3837-2023	V. S. Seufitelli, Gabriel/0000-0002-1901-5494	National Natural Science Fund Program of China [51776042, U1361115]; Scientific Research Foundation of Graduate School of Southeast University, China [YBPY1904]; Program of China Scholarships Council [201806090028]	National Natural Science Fund Program of China(National Natural Science Foundation of China (NSFC)); Scientific Research Foundation of Graduate School of Southeast University, China; Program of China Scholarships Council	This work was sponsored by the National Natural Science Fund Program of China (51776042 & U1361115), the Scientific Research Foundation of Graduate School of Southeast University, China (YBPY1904) and the Program of China Scholarships Council (201806090028).		44	65	70	22	226	PERGAMON-ELSEVIER SCIENCE LTD	OXFORD	THE BOULEVARD, LANGFORD LANE, KIDLINGTON, OXFORD OX5 1GB, ENGLAND	0956-053X	1879-2456		WASTE MANAGE	Waste Manage.	FEB 1	2020	102
J	Tu, YN; Zhou, D; Liu, HY; Tang, W; Wu, WL; Li, YJ				Tu, Yi-na; Zhou, Die; Liu, Huaying; Tang, Wei; Wu, Weilin; Li, Yingjie			Insight into enhanced photogeneration mechanism of reactive intermediates from dissolved black carbon by co-pyrolysis of plastics and biomass	ENVIRONMENTAL TECHNOLOGY & INNOVATION			English	Article						Co-pyrolysis; Plastic; Biomass; Dissolved black carbon; Photophysical property; Reactive intermediates	ORGANIC-MATTER; BIOCHAR; DOM; PHOTOCHEMISTRY; OXIDATION; BINDING; SOILS; SCOPE	The dissolved black carbon (DBC) derived from co-pyrolysis of plastic and biomass be released into aquatic environment. DBC was an important photoactive constituent, however, the photo-chemical activity of DBC from the co-pyrolysis plastic and biomass remains unclear. Herein three popular plastic wastes (polystyrene, PS; polylactic acid, PLA; plastic mulch film, PMF) and pine needle biomass prepa…	[Tu, Yi-na; Zhou, Die; Tang, Wei; Wu, Weilin; Li, Yingjie] Kunming Univ Sci & Technol, Fac Environm Sci & Engn, Kunming 650500, Yunnan, Peoples R China; [Liu, Huaying] Kunming Univ Sci & Technol, Fac Chem Engn, Kunming 650500, Yunnan, Peoples R China	Kunming University of Science & Technology; Kunming University of Science & Technology	Li, YJ (corresponding author), Kunming Univ Sci & Technol, Fac Environm Sci & Engn, Kunming 650500, Yunnan, Peoples R China.;Liu, HY (corresponding author), Kunming Univ Sci & Technol, Fac Chem Engn, Kunming 650500, Yunnan, Peoples R China.	liuhuaying86@sina.com; yjli@kmust.edu.cn	吳, 威霖/GRR-4814-2022; Liu, Huaying/GNP-0824-2022		National Natural Science Foundation of China [22266020]; Yunnan Fundamental Research Projects [202201AT070097]	National Natural Science Foundation of China(National Natural Science Foundation of China (NSFC)); Yunnan Fundamental Research Projects	This research was financially supported by the National Natural Science Foundation of China (22266020) and the Yunnan Fundamental Research Projects (202201AT070097) .		70	1	1	20	56	ELSEVIER	AMSTERDAM	RADARWEG 29, 1043 NX AMSTERDAM, NETHERLANDS	2352-1864			ENVIRON TECHNOL INNO	Environ. Technol. Innov.	FEB	2024	33
J	Wang, XB; Jin, QM; Wang, L; Bai, S; Mikulcic, H; Vujanovic, M; Tan, HZ				Wang, Xuebin; Jin, Qiming; Wang, Liang; Bai, Shengjie; Mikulcic, Hrvoje; Vujanovic, Milan; Tan, Houzhang			Synergistic effect of biomass and polyurethane waste co-pyrolysis on soot formation at high temperatures	JOURNAL OF ENVIRONMENTAL MANAGEMENT			English	Article						Biomass; Polyurethane; Co-pyrolysis; Synergistic effect; Soot	POLYCYCLIC AROMATIC-HYDROCARBONS; EVOLUTION; ACETYLENE; PAH; NANOSTRUCTURE; INCINERATION; COMBUSTION; EMISSIONS; DESIGN; SLUDGE	Soot is an important toxic pollutant generated during high-temperature incineration of solid waste (i.e., biomass and plastic waste) under air-lean conditions, and has a great impact on flame radiation. The main objective of this work is to study the synergistic effect of biomass and polyurethane co-pyrolysis on soot formation at high temperatures (1100-1250 degrees C). The effects of temperature…	[Wang, Xuebin; Jin, Qiming; Bai, Shengjie; Tan, Houzhang] Xi An Jiao Tong Univ, MOE Key Lab Thermofluid Sci & Engn, Xian 710049, Peoples R China; [Wang, Liang] SINTEF Energy Res, Trondheim, Norway; [Mikulcic, Hrvoje; Vujanovic, Milan] Univ Zagreb, Fac Mech Engn & Naval Architecture, Zagreb 10000, Croatia	Xi'an Jiaotong University; SINTEF; University of Zagreb; University of Zagreb Faculty of Mechanical Engineering & Naval Architecture	Tan, HZ (corresponding author), Xi An Jiao Tong Univ, MOE Key Lab Thermofluid Sci & Engn, Xian 710049, Peoples R China.	wxb005@mail.xjtu.edu.cn	Wang, Liang/L-3759-2019; Wang, Xuebin/C-7203-2015	Wang, Liang/0000-0002-1458-7653; Wang, Xuebin/0000-0003-4270-7330; Jin, Qiming/0000-0001-9945-8596	National Key Research and Development Program of China [2017YFB0603902]; National Natural Science Foundation of China [51761125012, 51676157]; Fundamental Research Funds for the Central Universities; Natural Science Basic Research Plan in Shaanxi Province of China [2017JZ010]	National Key Research and Development Program of China(National Key Research & Development Program of China); National Natural Science Foundation of China(National Natural Science Foundation of China (NSFC)); Fundamental Research Funds for the Central Universities(Fundamental Research Funds for the Central Universities); Natural Science Basic Research Plan in Shaanxi Province of China	The authors gratefully acknowledge the financial support of the National Key Research and Development Program of China (No. 2017YFB0603902), the National Natural Science Foundation of China (Nos. 51761125012 and 51676157), the Fundamental Research Funds for the Central Universities, and Natural Science Basic Research Plan in Shaanxi Province of China (2017JZ010).		47	34	36	16	122	ACADEMIC PRESS LTD- ELSEVIER SCIENCE LTD	LONDON	24-28 OVAL RD, LONDON NW1 7DX, ENGLAND	0301-4797	1095-8630		J ENVIRON MANAGE	J. Environ. Manage.	JUN 1	2019	239
J	Akyürek, Z				Akyurek, Zuhal			Synergetic Effects during Co-Pyrolysis of Sheep Manure and Recycled Polyethylene Terephthalate	POLYMERS			English	Article						co-pyrolysis; synergy; kinetics; plastic waste; animal manure	THERMAL-BEHAVIOR; THERMOGRAVIMETRIC ANALYSIS; WASTE PLASTICS; SLOW PYROLYSIS; BIOMASS; KINETICS; CONVERSION; PARAMETERS; OPERATION; BLENDS	Continuous growth in energy demand and plastic waste production are two global emerging issues that require development of clean technologies for energy recovery and solid waste disposal. Co-pyrolysis is an effective thermochemical route for upgrading waste materials to produce energy and value added products. In this study, co-pyrolysis of sheep manure (SM) and recycled polyethylene terephthalat…	[Akyurek, Zuhal] Burdur Mehmet Akif Ersoy Univ, Fac Engn & Architecture, Dept Energy Syst Engn, TR-15030 Burdur, Turkey	Mehmet Akif Ersoy University	Akyürek, Z (corresponding author), Burdur Mehmet Akif Ersoy Univ, Fac Engn & Architecture, Dept Energy Syst Engn, TR-15030 Burdur, Turkey.	drzuhalakyurek@gmail.com		akyurek, zuhal/0000-0003-3102-4278					46	12	14	4	35	MDPI	BASEL	ST ALBAN-ANLAGE 66, CH-4052 BASEL, SWITZERLAND		2073-4360		POLYMERS-BASEL	Polymers	JUL	2021	13	14
J	Hu, Q; Tang, ZY; Yao, DD; Yang, HP; Shao, JG; Chen, HP				Hu, Qiang; Tang, Ziyue; Yao, Dingding; Yang, Haiping; Shao, Jingai; Chen, Hanping			Thermal behavior, kinetics and gas evolution characteristics for the co-pyrolysis of real-world plastic and tyre wastes	JOURNAL OF CLEANER PRODUCTION			English	Article						Waste plastics; Tyres; Co-pyrolysis; TG-FTIR; Synergistic interaction	LIGNOCELLULOSIC BIOMASS; TG-FTIR; CATALYTIC PYROLYSIS; CARBON NANOTUBES; POLYETHYLENE; CHAR; COPRODUCTION; TEMPERATURE; HYDROGEN	Investigations into the co-pyrolysis of four kinds of real-world plastics (high-density polyethylene (HDPE), low-density polyethylene (LDPE), polypropylene (PP), and polystyrene (PS)) and tyre were carried out in a TG-FTIR instrument. The thermal decomposition behavior, conversion kinetics and gas releasing properties during co-pyrolysis process were investigated. It was found that co-pyrolysis o…	[Hu, Qiang; Tang, Ziyue; Yao, Dingding; Yang, Haiping; Shao, Jingai; Chen, Hanping] Huazhong Univ Sci & Technol, Sch Energy & Power Engn, State Key Lab Coal Combust, Wuhan 430074, Peoples R China; [Hu, Qiang] Natl Univ Singapore, NUS Environm Res Inst NERI, Singapore 138602, Singapore	Huazhong University of Science & Technology; National University of Singapore	Yao, DD; Yang, HP (corresponding author), 1037 Luoyu Rd, Wuhan 430074, Peoples R China.	ydd_hust@163.com; yhping2002@163.com	Yao, Dingding/ABC-3913-2021; Hu, Qiang/KCK-5222-2024; Tang, Ziyue/ISU-7753-2023; Shao, Jingai/C-3933-2014	Shao, Jingai/0000-0002-2860-0708; Yao, Dingding/0000-0002-5489-8181	National Key Research and Development Project [2018YFC1902602]	National Key Research and Development Project(National Key Research & Development Program of China)	The authors wish to express their sincere thanks to the National Key Research and Development Project (2018YFC1902602) for the financial support. The authors are also grateful for the assistance on the experimental studies by the Analytical and Testing Center in Huazhong University of Science and Technology (http://atc.hust.edu.cn), Wuhan 430074, China.		38	118	122	24	303	ELSEVIER SCI LTD	London	125 London Wall, London, ENGLAND	0959-6526	1879-1786		J CLEAN PROD	J. Clean Prod.	JUL 1	2020	260
J	Hassan, H; Lim, JK; Hameed, BH				Hassan, H.; Lim, J. K.; Hameed, B. H.			Recent progress on biomass co-pyrolysis conversion into high-quality bio-oil	BIORESOURCE TECHNOLOGY			English	Review						Biomass; Bio-oil; Co-pyrolysis; Catalytic co-pyrolysis; Acid catalyst	CATALYTIC FAST PYROLYSIS; HIGH-DENSITY POLYETHYLENE; MICROWAVE-ASSISTED PYROLYSIS; LIGNOCELLULOSIC BIOMASS; BITUMINOUS COAL; MODIFIED HZSM-5; PINE SAWDUST; PALM SHELL; RICE STRAW; PLASTICS	Co-pyrolysis of biomass with abundantly available materials could be an economical method for production of bio-fuels. However, elimination of oxygenated compounds poses a considerable challenge. Catalytic co-pyrolysis is another potential technique for upgrading bio-oils for application as liquid fuels in standard engines. This technique promotes the production of high-quality bio-oil through ac…	[Hassan, H.; Lim, J. K.; Hameed, B. H.] Univ Sains Malaysia, Sch Chem Engn, Engn Campus, Nibong Tebal 14300, Penang, Malaysia; [Hassan, H.] Univ Teknol MARA UiTM Malaysia, Fac Chem Engn, Permatang Pauh 13500, Penang, Malaysia	Universiti Sains Malaysia	Hameed, BH (corresponding author), Univ Sains Malaysia, Sch Chem Engn, Engn Campus, Nibong Tebal 14300, Penang, Malaysia.	chbassim@usm.my	Hameed, Bassim/C-1270-2009; Hassan, Hamizura/HDO-2268-2022; Lim, Jit/G-3771-2010	Hassan, Hamizura/0000-0003-2266-2315	Ministry of Higher Education (MOHE), Malaysia; Universiti Sains Malaysia, under Research University (RU) grant [1001/PJKIMIA/814227]	Ministry of Higher Education (MOHE), Malaysia; Universiti Sains Malaysia, under Research University (RU) grant(Universiti Sains Malaysia)	The first author acknowledges the scholarship support from the Ministry of Higher Education (MOHE), Malaysia. The authors acknowledge the research grants provided by the Universiti Sains Malaysia, under Research University (RU) grant (Project No: 1001/PJKIMIA/814227) that resulted in this article.		82	283	302	44	565	ELSEVIER SCI LTD	OXFORD	THE BOULEVARD, LANGFORD LANE, KIDLINGTON, OXFORD OX5 1GB, OXON, ENGLAND	0960-8524	1873-2976		BIORESOURCE TECHNOL	Bioresour. Technol.	DEC	2016	221
J	Rahman, MH; Bhoi, PR; Menezes, PL				Rahman, Md Hafizur; Bhoi, Prakashbhai R.; Menezes, Pradeep L.			Pyrolysis of waste plastics into fuels and chemicals: A review	RENEWABLE & SUSTAINABLE ENERGY REVIEWS			English	Review						Plastic; Pollution; Pyrolysis; Renewable energy; Gasoline	HIGH-DENSITY POLYETHYLENE; CATALYTIC CO-PYROLYSIS; MUNICIPAL SOLID-WASTE; THERMAL-DEGRADATION; POLYLACTIC ACID; SILICA-ALUMINA; ZSM-5 ZEOLITE; BIOMASS; PRODUCTS; KINETICS	Pyrolysis is a viable thermochemical conversion (TCC) process to convert waste plastics into useful chemicals and alternative energy. Specifically, co-pyrolysis of plastics with biomass produce gasoline and diesel range hydrocarbons, aromatics, olefins, lubricants, and other valuable chemicals. Lignocellulosic biomass often produces low-quality fuel through pyrolysis, which could be improved by a…	[Rahman, Md Hafizur; Bhoi, Prakashbhai R.] Georgia Southern Univ, Dept Mech Engn, Statesboro, GA 30460 USA; [Rahman, Md Hafizur; Menezes, Pradeep L.] Univ Nevada, Dept Mech Engn, Reno, NV 89557 USA	University System of Georgia; Georgia Southern University; Nevada System of Higher Education (NSHE); University of Nevada Reno	Bhoi, PR (corresponding author), Georgia Southern Univ, Dept Mech Engn, Statesboro, GA 30460 USA.	mhrsazal@nevada.unr.edu; pbhoi@georgiasouthern.edu	Menezes, Pradeep/H-3829-2019; RAHMAN, MD HAFIZUR/GNM-9340-2022; Bhoi, Prakashbhai/Y-3477-2018	Bhoi, Prakashbhai/0000-0003-3310-4888; Rahman, Md Hafizur/0000-0001-9977-6797	Georgia Southern University	Georgia Southern University	The authors declare the following financial interests/personal re-lationships which may be considered as potential competing interests: Prakashbhai R. Bhoi reports was provided by Georgia Southern University.		115	22	22	50	124	PERGAMON-ELSEVIER SCIENCE LTD	OXFORD	THE BOULEVARD, LANGFORD LANE, KIDLINGTON, OXFORD OX5 1GB, ENGLAND	1364-0321	1879-0690		RENEW SUST ENERG REV	Renew. Sust. Energ. Rev.	DEC	2023	188
J	Suriapparao, DV; Tejasvi, R				Suriapparao, Dadi, V; Tejasvi, Ravi			A review on role of process parameters on pyrolysis of biomass and plastics: Present scope and future opportunities in conventional and microwave-assisted pyrolysis technologies	PROCESS SAFETY AND ENVIRONMENTAL PROTECTION			English	Review						Biomass; Plastics; Pyrolysis; Microwave; Co-pyrolysis; Bio-oil	CATALYTIC FAST PYROLYSIS; LOW-DENSITY POLYETHYLENE; BIO-OIL PRODUCTION; FLUIDIZED-BED REACTOR; FAST CO-PYROLYSIS; FUEL RANGE ALKANES; FIXED-BED; LIGNOCELLULOSIC BIOMASS; RICE HUSK; AROMATIC-HYDROCARBONS	Pyrolysis is one of the thermochemical conversion platforms for biomass and plastics into value-added product resources. The products formation significantly varied with feedstock composition, pyrolysis parameters, and heating source. Hence, the objectives of this review article are to understand the role of type of feedstock, heating rate, reaction temperature, residence time, feedstock particle…	[Suriapparao, Dadi, V; Tejasvi, Ravi] Pandit Deendayal Energy Univ, Sch Technol, Dept Chem Engn, Gandhinagar 382426, India; [Suriapparao, Dadi, V] Indian Inst Technol Madras, Dept Chem Engn, Chennai 600036, India	Pandit Deendayal Energy University; Indian Institute of Technology System (IIT System); Indian Institute of Technology (IIT) - Madras	Suriapparao, DV; Tejasvi, R (corresponding author), Pandit Deendayal Energy Univ, Sch Technol, Dept Chem Engn, Gandhinagar 382426, India.	dadi.suriapparao@sot.pdpu.ac.in; ravi.tejasvi@sot.pdpu.ac.in	Tejasvi, Ravi/E-7646-2018	Tejasvi, Ravi/0000-0002-1142-4277					269	75	80	43	255	ELSEVIER	AMSTERDAM	RADARWEG 29, 1043 NX AMSTERDAM, NETHERLANDS	0957-5820	1744-3598		PROCESS SAF ENVIRON	Process Saf. Environ. Protect.	JUN	2022	162
J	Suriapparao, DV; Gautam, R; Jeeru, LR				Suriapparao, Dadi V.; Gautam, Ribhu; Jeeru, Lakshmana Rao			Analysis of pyrolysis index and reaction mechanism in microwave-assisted ex-situ catalytic co-pyrolysis of agro-residual and plastic wastes	BIORESOURCE TECHNOLOGY			English	Article						Biomass; Plastics; Microwave pyrolysis; Catalyst; Pyrolysis index; Reaction Mechanism	BIO-OIL YIELD; RICE STRAW; BIOMASS; POLYPROPYLENE; HYDROCARBONS; TEMPERATURE; DENSITY; LIGNIN; HZSM-5; ZSM-5	Catalytic and non-catalytic microwave-assisted co-pyrolysis of biomass with plastics was performed to understand the interactions. An ex-situ configuration was adopted for performing catalytic co-pyrolysis experiments with ZSM-5 as a catalyst. Co-pyrolysis promoted cracking of vapors resulting in enhanced gas yields. ZSM-5 further enhanced the secondary cracking which resulted in low oil yields. …	[Suriapparao, Dadi V.] Pandit Deendayal Energy Univ, Sch Technol, Dept Chem Engn, Gandhinagar 382007, Gujarat, India; [Gautam, Ribhu] King Abdullah Univ Sci & Technol, Clean Combust Res Ctr, Thuwal 23955, Saudi Arabia; [Jeeru, Lakshmana Rao] Pandit Deendayal Energy Univ, Sch Petr Technol, Gandhinagar 382007, Gujarat, India	Pandit Deendayal Energy University; King Abdullah University of Science & Technology; Pandit Deendayal Energy University	Suriapparao, DV (corresponding author), Pandit Deendayal Energy Univ, Sch Technol, Dept Chem Engn, Gandhinagar 382007, Gujarat, India.	suryadadi165@gmail.com	Gautam, Ribhu/AAT-7218-2020; Jeeru, Lakshmana/AAB-3747-2020	Gautam, Ribhu/0000-0002-5567-7778					45	40	41	26	253	ELSEVIER SCI LTD	London	125 London Wall, London, ENGLAND	0960-8524	1873-2976		BIORESOURCE TECHNOL	Bioresour. Technol.	AUG	2022	357
J	Chen, Y; Wang, ZW; Chen, GF; Wang, Q; Sun, TL; Zhang, MJ; Du, ZM; Wu, MG; Guo, SH; Lei, TZ; Burra, KG; Gupta, AK				Chen, Yan; Wang, Zhiwei; Chen, Gaofeng; Wang, Qun; Sun, Tanglei; Zhang, Mengju; Du, Zhimin; Wu, Mengge; Guo, Shuaihua; Lei, Tingzhou; Burra, Kiran G.; Gupta, Ashwani K.			Synergistic effects and products yield analyses based on co-pyrolysis of poplar tree and rape stalks with polyethylene terephthalate and polypropylene	JOURNAL OF THE ENERGY INSTITUTE			English	Article						Co-pyrolysis; Synergistic effects; Products yield; Agroforestry residues; Waste plastic	TG-FTIR; DENSITY POLYETHYLENE; THERMAL-DEGRADATION; ENERGY-CONSUMPTION; BIOMASS; KINETICS; WASTE; SHELL; C-13	In this study, results from co-pyrolysis of poplar tree, rape stalks (biomass) and polyethylene terephthalate, polypropylene (plastics) are reported using thermogravimetric analyzer, Fourier transform infrared spectroscopy and Pyrolyzer-Gas chromatograph/Mass spectrometry. The individual samples, and their mixtures (in 1:1 mass mixture ratios) were investigated to evaluate their co-pyrolysis beha…	[Chen, Yan; Wang, Zhiwei; Chen, Gaofeng; Wang, Qun; Du, Zhimin; Wu, Mengge; Guo, Shuaihua] Henan Univ Technol, Sch Environm Engn, Zhengzhou 450001, Peoples R China; [Chen, Yan; Wang, Zhiwei; Chen, Gaofeng; Wang, Qun; Du, Zhimin; Wu, Mengge; Guo, Shuaihua] Henan Univ Technol, Inst Carbon Neutral, Zhengzhou 450001, Peoples R China; [Sun, Tanglei; Lei, Tingzhou] Changzhou Univ, Inst Urban & Rural Mi…	Henan University of Technology; Henan University of Technology; Changzhou University; Henan Academy of Sciences; University System of Maryland; University of Maryland College Park	Wang, ZW (corresponding author), Henan Univ Technol, Sch Environm Engn, Zhengzhou 450001, Peoples R China.;Lei, TZ (corresponding author), Changzhou Univ, Inst Urban & Rural Min, Changzhou 213164, Peoples R China.;Gupta, AK (corresponding author), Univ Maryland, Dept Mech Engn, Combust Lab, College Pk, MD 20742 USA.	bioenergy@163.com; china_newenergy@163.com; akgupta@umd.edu	Wang, Zhi-Wei/P-1561-2018	Gupta, Ashwani/0000-0001-8047-8706; lei, tingzhou/0000-0003-0124-7091	National Natural Science Founda- tion of China [52276181]; Henan Province Talent Project [194200510028]	National Natural Science Founda- tion of China(National Natural Science Foundation of China (NSFC)); Henan Province Talent Project	This study was supported by the National Natural Science Founda- tion of China (52276181) , and the Henan Province Talent Project (194200510028) .		45	9	9	3	13	ELSEVIER SCI LTD	London	125 London Wall, London, ENGLAND	1743-9671	1746-0220		J ENERGY INST	J. Energy Inst.	FEB	2024	112
J	Nardella, F; Bellavia, S; Mattonai, M; Ribechini, E				Nardella, Federica; Bellavia, Simona; Mattonai, Marco; Ribechini, Erika			Co-pyrolysis of wood and plastic: Evaluation of synergistic effects and kinetic data by evolved gas analysis-mass spectrometry (EGA-MS)	JOURNAL OF ANALYTICAL AND APPLIED PYROLYSIS			English	Article						Biomass; Co-pyrolysis; Evolved gas analysis; Mass spectrometry; Isoconversional methods	THERMOGRAVIMETRIC CHARACTERISTICS; ARCHAEOLOGICAL WOOD; THERMAL-BEHAVIOR; RECENT PROGRESS; BIOMASS BLENDS; CELLULOSE; GASIFICATION; CONVERSION; MICROALGAE; WASTE	Co-pyrolysis of biomass and plastics gives rise to synergistic effects that can improve the properties of the resulting bio-oil. In this paper, the co-pyrolysis of lignocellulose (softwoods and hardwoods) and plastic (polyethylene and polystyrene) mixtures at different ratios was investigated by evolved gas analysis-mass spectrometry (EGA-MS). Through the extraction of specific sets of m/z values…	[Nardella, Federica; Bellavia, Simona; Mattonai, Marco; Ribechini, Erika] Univ Pisa, Dept Chem & Ind Chem, Via G Moruzzi 13, I-56124 Pisa, Italy	University of Pisa	Mattonai, M (corresponding author), Univ Pisa, Dept Chem & Ind Chem, Via G Moruzzi 13, I-56124 Pisa, Italy.	marco.mattonai@dcci.unipi.it	Mattonai, Marco/GVS-1759-2022; Ribechini, Erika/AAH-3769-2020; Ribechini, Erika/M-7210-2014	Mattonai, Marco/0000-0001-5874-1811; Ribechini, Erika/0000-0002-4978-2782	JPI-Cultural Heritage project StAr-Development of 298 Storage and Assessment methods suited for organic Archaeological artefacts [2020- 299 2023]	JPI-Cultural Heritage project StAr-Development of 298 Storage and Assessment methods suited for organic Archaeological artefacts	The Authors acknowledge the JPI-Cultural Heritage project StAr-Development of 298 Storage and Assessment methods suited for organic Archaeological artefacts (2020- 299 2023) .		45	14	14	4	44	ELSEVIER	AMSTERDAM	RADARWEG 29, 1043 NX AMSTERDAM, NETHERLANDS	0165-2370	1873-250X		J ANAL APPL PYROL	J. Anal. Appl. Pyrolysis	OCT	2021	159
J	Ryu, HW; Kim, D; Jae, J; Lam, SS; Park, ED; Park, YK				Ryu, Hae Won; Kim, Do Heui; Jae, Jungho; Lam, Su Shiung; Park, Eun Duck; Park, Young-Kwon			Recent advances in catalytic co -pyrolysis of biomass and plastic waste for the production of petroleum -like hydrocarbons	BIORESOURCE TECHNOLOGY			English	Article							HIGH-DENSITY POLYETHYLENE; LIGNOCELLULOSIC BIOMASS; BIO-OIL; AROMATIC-HYDROCARBONS; BIOETHANOL PRODUCTION; RECENT PROGRESS; YELLOW-POPLAR; PILOT-SCALE; CELLULOSE; FUELS		[Ryu, Hae Won; Kim, Do Heui] Seoul Natl Univ, Sch Chem & Biol Engn, Inst Chem Proc, 1 Gwanak Ro, Seoul 08826, South Korea; [Jae, Jungho] Pusan Natl Univ, Sch Chem & Biomol Engn, Busan 46241, South Korea; [Lam, Su Shiung] Univ Malaysia Terengganu, Inst Trop Aquaculture & Fisheries AKUATROP, Pyrolysis Technol Res Grp, Kuala Nerus 21030, Malaysia; [Park, Eun Duck] Ajou Univ, Dept Chem Engn, Suwon 16…	Seoul National University (SNU); Pusan National University; Universiti Malaysia Terengganu; Ajou University; Ajou University; University of Seoul	Park, YK (corresponding author), Univ Seoul, Sch Environm Engn, Seoul 02504, South Korea.	catalica@uos.ac.kr	Lam, Su Shiung/K-7436-2012		C1 Gas Refinery Program through the National Research Foundation of Korea (NRF) - Ministry of Science and ICT [2015M3D3A1A01064899]; C1 Gas Refinery Program through the National Research Foundation of Korea (NRF) - Ministry of Science, ICT& Future Planning [2016M3D3A1A01913252]	C1 Gas Refinery Program through the National Research Foundation of Korea (NRF) - Ministry of Science and ICT(National Research Foundation of KoreaMinistry of Science, ICT & Future Planning, Republic of Korea); C1 Gas Refinery Program through the National Research Foundation of Korea (NRF) - Ministry of Science, ICT& Future Planning(National Research Foundation of KoreaMinistry of Science, ICT & …	This work was supported by the C1 Gas Refinery Program through the National Research Foundation of Korea (NRF) funded by the Ministry of Science and ICT (2015M3D3A1A01064899). This research was also supported by the C1 Gas Refinery Program through the National Research Foundation of Korea (NRF), funded by the Ministry of Science, ICT& Future Planning (2016M3D3A1A01913252).		109	229	241	47	467	ELSEVIER SCI LTD	OXFORD	THE BOULEVARD, LANGFORD LANE, KIDLINGTON, OXFORD OX5 1GB, OXON, ENGLAND	0960-8524	1873-2976		BIORESOURCE TECHNOL	Bioresour. Technol.	AUG	2020	310
J	Chattopadhyay, J; Pathak, TS; Srivastava, R; Singh, AC				Chattopadhyay, Jayeeta; Pathak, T. S.; Srivastava, R.; Singh, A. C.			Catalytic co-pyrolysis of paper biomass and plastic mixtures (HDPE (high density polyethylene), PP (polypropylene) and PET (polyethylene terephthalate)) and product analysis	ENERGY			English	Article						Solid waste management; Co-pyrolysis; Biomass; Plastics; Cobalt catalysts	THERMAL-DEGRADATION; WOOD BIOMASS; PART 1; WATER; LIQUEFACTION; COMBUSTION; EVOLUTION; FUELS	Catalytic co-pyrolysis of biomass and plastics (HDPE (high density polyethylene), PP (polypropylene) and PET (polyethylene terephthalate)) has been performed in a fixed-bed reactor in presence of cobalt based alumina, ceria and ceria-alumina catalysts to analyze the product distribution and selectivity. Catalysts are synthesized using co-precipitation method and characterized by BET (Brunauer-Emm…	[Chattopadhyay, Jayeeta; Singh, A. C.] Birla Inst Technol, Dept Chem, Deoghar Campus, Jasidih 814142, Jharkhand, India; [Pathak, T. S.] Surendra Inst Engn & Management, Dept Chem, Siliguri 734009, W Bengal, India; [Srivastava, R.] Indian Inst Sci, Dept Inorgan & Phys Chem, Bangalore 560012, Karnataka, India	Birla Institute of Technology Mesra; Indian Institute of Science (IISC) - Bangalore	Chattopadhyay, J (corresponding author), Birla Inst Technol, Dept Chem, Deoghar Campus, Jasidih 814142, Jharkhand, India.	jayeeta08@gmail.com	Singh, Anil/JUU-2219-2023; Srivastava, Rohit/AAE-1273-2019; Chattopadhyay, Jayeeta/G-7909-2011	Srivastava, Rohit/0000-0002-9957-8499; Chattopadhyay, Jayeeta/0000-0002-3998-3214					23	200	215	9	202	PERGAMON-ELSEVIER SCIENCE LTD	OXFORD	THE BOULEVARD, LANGFORD LANE, KIDLINGTON, OXFORD OX5 1GB, ENGLAND	0360-5442	1873-6785		ENERGY	Energy	MAY 15	2016	103
J	Wang, ZQ; An, SW; Zhao, J; Sun, P; Lyu, H; Kong, WW; Shen, BX				Wang, Zhiqiang; An, Shengwei; Zhao, Jian; Sun, Peng; Lyu, Honghong; Kong, Wenwen; Shen, Boxiong			Plastic regulates its co-pyrolysis process with biomass: Influencing factors, model calculations, and mechanisms	FRONTIERS IN ECOLOGY AND EVOLUTION			English	Article						co-pyrolysis; biomass; polypropylene; synergistic effect; kinetics	THERMAL-DECOMPOSITION; KINETIC-ANALYSIS; BEHAVIOR; MICROALGAE; EVOLUTION; SAWDUST; BLENDS; WASTE	Co-pyrolysis of plastics and biomass can effectively improve the quality of bio-oil and solve the problem of plastic pollution. However, synergistic effect of co-pyrolysis on kinetics and the role of biomass H/C-eff in co-pyrolysis are still not conclusive. In this work, the co-pyrolysis synergistic effects of three different hydrogen-to-carbon ratio (H/C-eff) of biomass-rice husk (RH), sugarcane…	[Wang, Zhiqiang; An, Shengwei; Zhao, Jian; Sun, Peng; Lyu, Honghong; Kong, Wenwen] Hebei Univ Technol, Sch Energy & Environm Engn, Tianjin Key Lab Clean Energy & Pollut Control, Tianjin, Peoples R China; [Shen, Boxiong] Hebei Univ Technol, Sch Chem Engn & Technol, Tianjin, Peoples R China	Hebei University of Technology; Hebei University of Technology	Lyu, H; Kong, WW (corresponding author), Hebei Univ Technol, Sch Energy & Environm Engn, Tianjin Key Lab Clean Energy & Pollut Control, Tianjin, Peoples R China.;Shen, BX (corresponding author), Hebei Univ Technol, Sch Chem Engn & Technol, Tianjin, Peoples R China.	honghonglyu@hebut.edu.cn; 2019914@hebut.edu.cn; shenbx@hebut.edu.cn	zhao, jianxiang/HHS-2927-2022; Shen, Boxiong/IZQ-5830-2023	Lyu, Honghong/0000-0002-0017-8410; Shen, Boxiong/0000-0002-6119-2558	National Natural Science Foundation of China [U20A20302, 42177218, 52100119]; Young Elite Scientists Sponsorship Program by Tianjin [TJSQNTJ-2020-06]; Innovative Group Projects in Hebei Province [E2021202006]; Hebei Outstanding Youth Science Foundation [D2019202453]; Natural Science Foundation of Tianjin [20JCQNJC00940]; Funding Projects for the Introduction of Overseas Students in Hebei Province…	National Natural Science Foundation of China(National Natural Science Foundation of China (NSFC)); Young Elite Scientists Sponsorship Program by Tianjin; Innovative Group Projects in Hebei Province; Hebei Outstanding Youth Science Foundation; Natural Science Foundation of Tianjin(Natural Science Foundation of Tianjin); Funding Projects for the Introduction of Overseas Students in Hebei Province; …	This work was supported by the National Natural Science Foundation of China (42177218 and 52100119), Young Elite Scientists Sponsorship Program by Tianjin (TJSQNTJ-2020-06), Joint Funds of the National Natural Science Foundation of China (U20A20302), Innovative Group Projects in Hebei Province (E2021202006), Hebei Outstanding Youth Science Foundation (D2019202453), Natural Science Foundation of T…		53	7	8	22	90	FRONTIERS MEDIA SA	LAUSANNE	AVENUE DU TRIBUNAL FEDERAL 34, LAUSANNE, CH-1015, SWITZERLAND	2296-701X			FRONT ECOL EVOL	Front. Ecol. Evol.	JUL 29	2022	10
J	Zhang, XS; Lei, HW; Chen, SL; Wu, J				Zhang, Xuesong; Lei, Hanwu; Chen, Shulin; Wu, Joan			Catalytic co-pyrolysis of lignocellulosic biomass with polymers: a critical review	GREEN CHEMISTRY			English	Review							FUEL RANGE ALKANES; BIO-OIL PRODUCTION; CONICAL SPOUTED BED; FLUIDIZED-BED; JET FUEL; AROMATIC-HYDROCARBONS; DENSITY POLYETHYLENE; WASTE TIRES; PALM SHELL; PART 1	The increasing demand for renewable chemicals and fuels requires the exploitation of alternative feedstock to replace petroleum-derived chemicals and fuels. Lignocellulosic biomass has been considered as the most promising feedstock for the production of sustainable biofuels. Catalytic fast pyrolysis (CFP) is more amenable to directly converting biomass into high quality biofuel. However, even in…	[Zhang, Xuesong; Lei, Hanwu; Chen, Shulin; Wu, Joan] Washington State Univ, Dept Biol Syst Engn, Richland, WA 99354 USA	Washington State University	Lei, HW (corresponding author), Washington State Univ, Dept Biol Syst Engn, Richland, WA 99354 USA.	hlei@wsu.edu	Chen, Shulin/GXG-9029-2022; Lei, Hanwu/S-1122-2019; Zhang, Xuesong/JMQ-7240-2023	Zhang, Xuesong/0000-0001-5346-9636	Agriculture and Food Research Initiative of National Institute of Food and Agriculture; United States Department of Agriculture [2015-67021-22911, 2016-67021-24533]; WSU Office of Commercialization; Offices of the President and Provost in conjunction with the Vice President of Research; Washington Research Foundation; Chinese Scholarship Council; NIFA [2016-67021-24533, 810896] Funding Source: Fe…	Agriculture and Food Research Initiative of National Institute of Food and Agriculture; United States Department of Agriculture(United States Department of Agriculture (USDA)); WSU Office of Commercialization; Offices of the President and Provost in conjunction with the Vice President of Research; Washington Research Foundation; Chinese Scholarship Council(China Scholarship Council); NIFA(United …	This study was supported partially by the Agriculture and Food Research Initiative of National Institute of Food and Agriculture, United States Department of Agriculture (Award Number: 2015-67021-22911; Award Number: 2016-67021-24533), WSU Office of Commercialization and the Offices of the President and Provost in conjunction with the Vice President of Research, the Washington Research Foundation…		184	378	402	31	562	ROYAL SOC CHEMISTRY	CAMBRIDGE	THOMAS GRAHAM HOUSE, SCIENCE PARK, MILTON RD, CAMBRIDGE CB4 0WF, CAMBS, ENGLAND	1463-9262	1463-9270		GREEN CHEM	Green Chem.	AUG 7	2016	18	15
J	Abnisa, F; Alaba, PA				Abnisa, Faisal; Alaba, Peter Adeniyi			Recovery of liquid fuel from fossil-based solid wastes via pyrolysis technique: A review	JOURNAL OF ENVIRONMENTAL CHEMICAL ENGINEERING			English	Review						Pyrolysis; Waste plastic; Fuel recovery; Solid waste; Catalytic pyrolysis; Biomass co-pyrolysis	HIGH-DENSITY POLYETHYLENE; CATALYTIC CO-PYROLYSIS; POLYCYCLIC AROMATIC-HYDROCARBONS; BIO-OIL PRODUCTION; PLASTIC WASTE; THERMAL-DEGRADATION; POLYVINYL-CHLORIDE; THERMOGRAVIMETRIC ANALYSIS; PROCESS PARAMETERS; TETRA PAK	This study unveils the conversion of fossil-based solid waste into liquid fuel via the pyrolysis technique, starting from discovering the feedstock source to the end of product collection. The waste considered includes all types of plastic (polyethylene terephthalate, polystyrene, low-density polyethylene, high-density polyethylene, polyvinyl chloride, polypropylene), and tyres. The concern is th…	[Abnisa, Faisal] King Abdulaziz Univ, Fac Engn, Dept Chem & Mat Engn, Rabigh 21911, Saudi Arabia; [Alaba, Peter Adeniyi] Univ Malaya, Fac Engn, Dept Chem Engn, Kuala Lumpur 50603, Malaysia	King Abdulaziz University; Universiti Malaya	Abnisa, F (corresponding author), King Abdulaziz Univ, Fac Engn, Dept Chem & Mat Engn, Rabigh 21911, Saudi Arabia.	fta@kau.edu.sa; adeniyipee@live.com	Alaba, Peter/M-5166-2016; Abnisa, Faisal/C-4802-2015		Deanship of Scientific Research (DSR), King Abdulaziz University, Jeddah	Deanship of Scientific Research (DSR), King Abdulaziz University, Jeddah	This project was funded by the Deanship of Scientific Research (DSR), King Abdulaziz University, Jeddah. The authors, therefore, gratefully acknowledge DSR technical and financial support.		186	42	42	9	90	ELSEVIER SCI LTD	OXFORD	THE BOULEVARD, LANGFORD LANE, KIDLINGTON, OXFORD OX5 1GB, OXON, ENGLAND	2213-2929	2213-3437		J ENVIRON CHEM ENG	J. Environ. Chem. Eng.	DEC	2021	9	6
J	Stancin, H; Safár, M; Ruzicková, J; Mikulcic, H; Raclavská, H; Wang, X; Duic, N				Stancin, H.; Safar, M.; Ruzickova, J.; Mikulcic, H.; Raclavska, H.; Wang, X.; Duic, N.			Co-pyrolysis and synergistic effect analysis of biomass sawdust and polystyrene mixtures for production of high-quality bio-oils	PROCESS SAFETY AND ENVIRONMENTAL PROTECTION			English	Article						Co-pyrolysis; Polystyrene; Sawdust; Synergistic effect; Oil composition	HIGH-DENSITY POLYETHYLENE; PLASTIC WASTE; AROMATIC-HYDROCARBONS; CATALYTIC PYROLYSIS; RECENT PROGRESS; LIQUID; CONVERSION; FUELS; HDPE; WOOD	Usage of traditional biomass raises serious concerns regarding its sustainability due to the inefficient combustion in household stoves and potential over-usage if the intention is to replace fossil fuels in power plants. Co-pyrolysis of biomass feedstock with different waste materials, especially plastics, might be a promising alternative for sustainable usage of enhanced biofuels. Even more, co…	[Stancin, H.; Mikulcic, H.; Duic, N.] Univ Zagreb, Fac Mech Engn & Naval Architecture, Ivana Lucica 5, Zagreb 10000, Croatia; [Safar, M.; Ruzickova, J.; Raclavska, H.] ENET Ctr VSB Tech Univ Ostrava, 17 Listopadu 2172-15, Ostrava 70800, Czech Republic; [Mikulcic, H.; Wang, X.] Xi An Jiao Tong Univ, Dept Thermal Engn, Xianning West Rd, Xian, Peoples R China; [Raclavska, H.] VSB Tech Univ Ostrava, …	University of Zagreb; University of Zagreb Faculty of Mechanical Engineering & Naval Architecture; Technical University of Ostrava; Xi'an Jiaotong University; Technical University of Ostrava	Stancin, H (corresponding author), Univ Zagreb, Fac Mech Engn & Naval Architecture, Ivana Lucica 5, Zagreb 10000, Croatia.	hrvoj.stancin@fsb.hr; michal.safar@vsb.cz; jana.ruzickova@vsb.cz; hrvoje.mikulcic@fsb.hr; helena.raclavska@vsb.cz; wxb005@mail.xjtu.edu.cn; neven.duic@fsb.hr	Duić, Neven/J-5242-2012; Raclavska, Helena/HGC-1385-2022; Stančin, Hrvoje/AAB-6854-2020; Safar, Michal/AAC-5552-2019; Ruzickova, Jana/Q-5953-2017	Raclavska, Helena/0000-0001-8220-5883; Safar, Michal/0000-0002-6634-7432; Ruzickova, Jana/0000-0001-6919-0912	Ministry of Education, Youth and Sport of the Czech Republic [CZ.02.1.01/0.0/0.0/16_019/0000753]; National Natural Science Foundation of China [51676157, 51761125012]; China Postdoctoral Foundation	Ministry of Education, Youth and Sport of the Czech Republic(Ministry of Education, Youth & Sports - Czech Republic); National Natural Science Foundation of China(National Natural Science Foundation of China (NSFC)); China Postdoctoral Foundation(China Postdoctoral Science Foundation)	This work was supported by the research projects of the Ministry of Education, Youth and Sport of the Czech Republic: OP RDE grant number CZ.02.1.01/0.0/0.0/16_019/0000753 Research centre for low -carbon energy technologies. The co-authors Dr. Hrvoje MikurCiC and Prof. Xuebin Wang greatly acknowledge the financial support of the National Natural Science Foundation of China (Nos. 51676157 and 5176…		50	58	59	7	102	ELSEVIER	AMSTERDAM	RADARWEG 29, 1043 NX AMSTERDAM, NETHERLANDS	0957-5820	1744-3598		PROCESS SAF ENVIRON	Process Saf. Environ. Protect.	JAN	2021	145
J	Çepeliogullara, Ö; Pütün, AE				Cepeliogullara, Ozge; Putun, Aye E.			Products characterization study of a slow pyrolysis of biomass-plastic mixtures in a fixed-bed reactor	JOURNAL OF ANALYTICAL AND APPLIED PYROLYSIS			English	Article						Biomass; Plastic; Co-pyrolysis; Fixed-bed; Characterization	CO-PYROLYSIS; MECHANICAL-PROPERTIES; THERMAL-DEGRADATION; SYNTHETIC-POLYMERS; PART I; WASTE; FUEL; WOOD; LIQUID; COMBUSTION	In this study, co-pyrolysis of plastic wastes; polyvinyl chloride (PVC) and polyethylene terephthalate (PET) with different agricultural wastes such as cotton stalk, hazelnut shells, and sunflower residues near an arid land plant Euphorbia rigida was investigated. Thermal behaviors of raw materials were investigated by using thermogravimetric analyzer. Experiments were conducted at a heating rate…	[Cepeliogullara, Ozge] Istanbul Tech Univ, Fac Chem & Met Engn, Dept Chem Engn, TR-34469 Istanbul, Turkey; [Putun, Aye E.] Anadolu Univ, Fac Engn, Dept Chem Engn, TR-26555 Eskisehir, Turkey	Istanbul Technical University; Anadolu University	Çepeliogullara, Ö (corresponding author), Istanbul Tech Univ, Fac Chem & Met Engn, Dept Chem Engn, TR-34469 Istanbul, Turkey.	cepeliogullar@itu.edu.tr; aeputun@anadolu.edu.tr							40	76	83	3	97	ELSEVIER	AMSTERDAM	RADARWEG 29, 1043 NX AMSTERDAM, NETHERLANDS	0165-2370	1873-250X		J ANAL APPL PYROL	J. Anal. Appl. Pyrolysis	NOV	2014	110
J	Mariyam, S; Mckay, G; Al-Ansari, T				Mariyam, Sabah; Mckay, Gordon; Al-Ansari, Tareq			Waste catalyst potential for co-pyrolysis of biomass and single-use plastics: model-free isoconversional kinetics and thermodynamics	ENVIRONMENT DEVELOPMENT AND SUSTAINABILITY			English	Article						Co-pyrolysis; Biomass; Kinetics; Model-free; Plastic; Catalyst	CALCIUM-CARBONATE; CUTTLEBONE	The study aims to investigate the kinetic and thermodynamic characteristics of single and binary pyrolysis of biomass (date pits: DP) and single-use-plastics (polypropylene: PP, and polystyrene: PS), and the effect of adding natural catalysts-seashell (SS) and cuttlebone (CB) for ternary co-pyrolysis of the feeds. The activation energy (Ea) was calculated using different model-free kinetic method…	[Mariyam, Sabah; Mckay, Gordon; Al-Ansari, Tareq] Hamad Bin Khalifa Univ, Qatar Fdn, Coll Sci & Engn, Div Sustainable Dev, Doha, Qatar	Qatar Foundation (QF); Hamad Bin Khalifa University-Qatar	Mariyam, S (corresponding author), Hamad Bin Khalifa Univ, Qatar Fdn, Coll Sci & Engn, Div Sustainable Dev, Doha, Qatar.	smariyam@hbku.edu.qa	McKay, Gareth/HNJ-3797-2023	Mariyam, Sabah/0000-0002-4766-5726	Qatar National Library; Qatar National Research Fund [NPRP11S-0117-180328]	Qatar National Library(Qatar National Research Fund (QNRF)); Qatar National Research Fund(Qatar National Research Fund (QNRF))	Open Access funding provided by the Qatar National Library. Qatar National Research Fund, NPRP11S-0117-180328, Gordon McKay.		43	6	6	5	24	SPRINGER	DORDRECHT	VAN GODEWIJCKSTRAAT 30, 3311 GZ DORDRECHT, NETHERLANDS	1387-585X	1573-2975		ENVIRON DEV SUSTAIN	Environ. Dev. Sustain.	DEC	2024	26	12
J	Mo, FJ; Ullah, H; Zada, N; Shahab, A				Mo, Fujin; Ullah, Habib; Zada, Noor; Shahab, Asfandyar			A Review on Catalytic Co-Pyrolysis of Biomass and Plastics Waste as a Thermochemical Conversion to Produce Valuable Products	ENERGIES			English	Review						biomass; plastic; catalytic co-pyrolysis; bio-oil; catalyst	MICROWAVE-ASSISTED PYROLYSIS; HIGH-DENSITY POLYETHYLENE; BIO-OIL PRODUCTION; IN-SITU; LIGNOCELLULOSIC BIOMASS; HYDROCARBON YIELD; FUNCTIONAL-GROUPS; SYNGAS PRODUCTION; THERMAL-BEHAVIOR; AROMATICS	In order to satisfy the increasing need for renewable chemicals and fuels, it is important to replace petroleum-based products with alternative feedstocks. Lignocellulosic biomass is considered to be the most capable alternative source for producing sustainable biofuels. Catalytic co-pyrolysis (CCP) is a process that involves simultaneously pyrolyzing biomass and plastics to produce a combination…	[Mo, Fujin] Guilin Univ Technol Nanning, Dept Met & Resource Engn, Nanning 530003, Peoples R China; [Ullah, Habib] Zhejiang Univ, Innovat Ctr Yangtze River Delta, Hangzhou 311400, Peoples R China; [Zada, Noor] Govt Postgrad Coll, Dept Chem, Timergara 18300, Pakistan; [Shahab, Asfandyar] Guilin Univ Technol, Coll Environm Sci & Engn, Guilin 541004, Peoples R China	Guilin University of Technology; Zhejiang University; Guilin University of Technology	Ullah, H (corresponding author), Zhejiang Univ, Innovat Ctr Yangtze River Delta, Hangzhou 311400, Peoples R China.	habib901@zju.edu.cn	Ullah, Habib/AEQ-8831-2022; Shahab, Asfandyar/AER-8310-2022	Shahab, Asfandyar/0000-0003-4422-5933; Ullah, Habib/0000-0002-2958-8958					114	21	21	16	75	MDPI	BASEL	ST ALBAN-ANLAGE 66, CH-4052 BASEL, SWITZERLAND		1996-1073		ENERGIES	Energies	JUL	2023	16	14
J	Stancin, H; Mikulcic, H; Manic, N; Stojiljikovic, D; Vujanovic, M; Wang, X; Duic, N				Stancin, H.; Mikulcic, H.; Manic, N.; Stojiljikovic, D.; Vujanovic, M.; Wang, X.; Duic, N.			Thermogravimetric and kinetic analysis of biomass and polyurethane foam mixtures Co-Pyrolysis	ENERGY			English	Article						Thermogravimetric analysis; Kinetic analysis; Sawdust; Polyurethane; Co-pyrolysis	THERMAL-DEGRADATION; VOLATILE PRODUCTS; PLASTICS; BEHAVIORS; SAWDUST	Alternative fuels are crucial for the decarbonisation of high-energy demanding processes. The utilisation of waste materials to produce alternative fuels is especially interesting since, the co-pyrolysis of waste plastics and biomass was lately introduced as promising method since the synergistic effect might enhance the product properties compared to those from individual pyrolysis. Furthermore,…	[Stancin, H.; Mikulcic, H.; Vujanovic, M.; Duic, N.] Univ Zagreb, Fac Mech Engn & Naval Architecture, Ivana Lucica 5, Zagreb 10000, Croatia; [Manic, N.; Stojiljikovic, D.] Univ Belgrade, Fac Mech Engn, Kraljice Marije 16, Belgrade, Serbia; [Mikulcic, H.; Wang, X.] Xi An Jiao Tong Univ, Dept Thermal Engn, Xianning West Rd, Xian, Shaanxi, Peoples R China	University of Zagreb; University of Zagreb Faculty of Mechanical Engineering & Naval Architecture; University of Belgrade; Xi'an Jiaotong University	Stancin, H (corresponding author), Univ Zagreb, Fac Mech Engn & Naval Architecture, Ivana Lucica 5, Zagreb 10000, Croatia.	hrvoje.stancin@fsb.hr	Manic, Nebojsa/AAG-8130-2021; Duić, Neven/J-5242-2012; Stančin, Hrvoje/AAB-6854-2020	Manic, Nebojsa/0000-0002-2801-8195					35	39	39	6	40	PERGAMON-ELSEVIER SCIENCE LTD	OXFORD	THE BOULEVARD, LANGFORD LANE, KIDLINGTON, OXFORD OX5 1GB, ENGLAND	0360-5442	1873-6785		ENERGY	Energy	DEC 15	2021	237
J	Chew, KW; Chia, SR; Chia, WY; Cheah, WY; Munawaroh, HSH; Ong, WJ				Chew, Kit Wayne; Chia, Shir Reen; Chia, Wen Yi; Cheah, Wai Yan; Munawaroh, Heli Siti Halimatul; Ong, Wee-Jun			Abatement of hazardous materials and biomass waste via pyrolysis and co-pyrolysis for environmental sustainability and circular economy	ENVIRONMENTAL POLLUTION			English	Article						Thermochemical conversion; Hazardous wastes; Biofuels; Waste management; Circular economy	POLYCYCLIC AROMATIC-HYDROCARBONS; POWER-GENERATION INDUSTRY; BIO-OIL PRODUCTION; HEAVY-METALS; AQUATIC ENVIRONMENT; SURFACE-MORPHOLOGY; MICROALGAE BIOMASS; CHLORELLA-VULGARIS; RENEWABLE ENERGY; ALTERNATIVE FUEL	The remarkable journey of progression of mankind has created various impacts in the form of polluted environment, amassed heavy metals and depleting resources. This alarming situation demands sustainable energy resources and approaches to deal with these environmental hazards and power deficit. Pyrolysis and co-pyrolysis address both energy and environmental issues caused by civilization and indu…	[Chew, Kit Wayne; Ong, Wee-Jun] Xiamen Univ Malaysia, Sch Energy & Chem Engn, Jalan Sunsuria, Sepang 43900, Selangor, Malaysia; [Chew, Kit Wayne; Ong, Wee-Jun] Xiamen Univ, Coll Chem & Chem Engn, Xiamen 361005, Fujian, Peoples R China; [Chia, Shir Reen; Chia, Wen Yi] Univ Nottingham Malaysia, Fac Sci & Engn, Dept Chem & Environm Engn, Jalan Broga, Semenyih 43500, Selangor, Malaysia; [Cheah, Wai Y…	Xiamen University Malaysia Campus; Xiamen University; University of Nottingham Malaysia; Mahsa University; Universitas Pendidikan Indonesia	Chew, KW (corresponding author), Xiamen Univ Malaysia, Sch Energy & Chem Engn, Jalan Sunsuria, Sepang 43900, Selangor, Malaysia.	kitwayne.chew@xmu.edu.my	Munawaroh, Heli/GOJ-8264-2022; Chew, Kit Wayne/R-2427-2019; Cheah, Wai Yan/M-2435-2019; Ong, Wee-Jun/O-1403-2013; Chia, Wen Yi/AES-2966-2022; Chia, Shir Reen/AAV-4066-2020	Halimatul Munawaroh, Heli Siti/0000-0002-4028-5747; Chia, Wen Yi/0000-0003-4348-0799; Cheah, Wai Yan/0000-0003-4531-5594; Chia, Shir Reen/0000-0003-2220-9983	Xiamen University Malaysia Research Fund [XMUMRF/2021-C7/IENG/0033]	Xiamen University Malaysia Research Fund	This work is supported by Xiamen University Malaysia Research Fund (Grant number: XMUMRF/2021-C7/IENG/0033). Special thanks to Mehmooda Fayyaz for her contribution to the completion of this work.		188	78	81	11	155	ELSEVIER SCI LTD	OXFORD	THE BOULEVARD, LANGFORD LANE, KIDLINGTON, OXFORD OX5 1GB, OXON, ENGLAND	0269-7491	1873-6424		ENVIRON POLLUT	Environ. Pollut.	JUN 1	2021	278
J	Suriapparao, DV; Vinu, R				Suriapparao, Dadi, V; Vinu, R.			Biomass waste conversion into value-added products via microwave-assisted Co-Pyrolysis platform	RENEWABLE ENERGY			English	Article						Susceptor; Biomass; Plastics; Energy yield; Bio-oil		The current work is focused to investigate the synergetic interactions between biomass (groundnut shell, bagasse, rice husk, Prosopis juliflora, mixed wood sawdust) and hydro-rich plastics (Low-density poly-ethylene (LDPE) and Polyisoprene (PIP)) in microwave co-pyrolysis. The heating value of co-pyrolysis oil (38-42 MJ kg(-1)) was enhanced dramatically compared to biomass pyrolysis oil (20-28 MJ…	[Suriapparao, Dadi, V] Pandit Deendayal Petr Univ, Dept Chem Engn, Gandhinagar 382007, India; [Suriapparao, Dadi, V; Vinu, R.] Indian Inst Technol Madras, Dept Chem Engn, Chennai 600036, Tamil Nadu, India	Pandit Deendayal Energy University; Indian Institute of Technology System (IIT System); Indian Institute of Technology (IIT) - Madras	Suriapparao, DV (corresponding author), Pandit Deendayal Petr Univ, Dept Chem Engn, Gandhinagar 382007, India.	suryadadi165@gmail.com	Vinu, Ravikrishnan/C-6150-2011						43	50	50	5	81	PERGAMON-ELSEVIER SCIENCE LTD	OXFORD	THE BOULEVARD, LANGFORD LANE, KIDLINGTON, OXFORD OX5 1GB, ENGLAND	0960-1481	1879-0682		RENEW ENERG	Renew. Energy	JUN	2021	170
J	Phakedi, D; Ude, AU; Oladijo, PO				Phakedi, Duna; Ude, Albert Uchenna; Oladijo, Philip Oluseyi			Co-pyrolysis of polymer waste and carbon-based matter as an alternative for waste management in the developing world	JOURNAL OF ANALYTICAL AND APPLIED PYROLYSIS			English	Article						Catalyst; Co-pyrolysis; Hydrocarbons; Polymers; Recycling; Waste management	LOW-DENSITY POLYETHYLENE; PLASTIC WASTE; THERMOGRAVIMETRIC ANALYSIS; THERMAL-BEHAVIOR; RECENT PROGRESS; OIL-SHALE; BIOMASS; KINETICS; CONVERSION; BLENDS	Waste management is a challenging but necessary process to ensure efficient and healthy disposal of waste. The challenges are made worse by poor recording keeping and weak governmental policies. In this review, polymer co-pyrolysis is been explored as a sustainable waste management practice which allows for both energy and resource recovery in such conditions. It looks at current progress in co-p…	[Phakedi, Duna; Ude, Albert Uchenna] Botswana Int Univ Sci & Technol, Dept Mech & Energy Engn, Palapye, Botswana; [Oladijo, Philip Oluseyi] Botswana Int Univ Sci & Technol, Dept Chem Mat & Met Engn, Palapye, Botswana		Ude, AU (corresponding author), Private Bag 16, Palapye, Botswana.	udea@biust.ac.bw			Botswana International University of Science and Technology	Botswana International University of Science and Technology	The authors would like to thank Botswana International University of Science and Technology for its support in providing resources used in carrying out this work.		81	20	20	1	23	ELSEVIER	AMSTERDAM	RADARWEG 29, 1043 NX AMSTERDAM, NETHERLANDS	0165-2370	1873-250X		J ANAL APPL PYROL	J. Anal. Appl. Pyrolysis	MAY	2021	155
J	Li, KY; Xu, YY; Ye, ZY; Huang, XA; Wu, XJ; Zou, YY				Li, Kaiyuan; Xu, Yuanyuan; Ye, Zhaoyu; Huang, Xina; Wu, Xujuan; Zou, Yanyan			Co-pyrolysis of thermoplastic polyurethane with paulownia wood: Synergistic effects on product properties and kinetics	FUEL			English	Article						TPU; PAW; Biomass; Co -pyrolysis; Synergistic effects; Pyrolysis kinetics	HIGH-DENSITY POLYETHYLENE; BIOMASS ENERGY; THERMAL-DEGRADATION; FLAME-RETARDANT; WASTE PLASTICS; TG-FTIR; CELLULOSE; BEHAVIOR; MECHANISM; SAWDUST	Co-pyrolysis of plastics and biomass offers an effective approach for waste disposal. In this study, the synergistic effects during the co-pyrolysis of thermoplastic polyurethane (TPU) and paulownia wood (PAW) were investigated in terms of pyrolysis kinetics and product properties using tube furnace, TG-FTIR and GC/MS. The results revealed that co-pyrolysis promoted the material pyrolysis and fac…	[Li, Kaiyuan; Xu, Yuanyuan; Huang, Xina; Wu, Xujuan; Zou, Yanyan] Wuhan Univ Technol, Sch Safety Sci & Emergency Management, Wuhan 430070, Peoples R China; [Ye, Zhaoyu] Univ Canterbury, Dept Civil & Nat Resources Engn, Private Bag 4800, Christchurch 8140, New Zealand	Wuhan University of Technology; University of Canterbury	Wu, XJ; Zou, YY (corresponding author), Wuhan Univ Technol, Sch Safety Sci & Emergency Management, Wuhan 430070, Peoples R China.	kyli@whut.edu.cn; xuyuanyuan2101@whut.edu.cn; vivian.ye@pg.canterbury.ac.nz; huangxina@whut.edu.cn; wuxj@whut.edu.cn; yanyanzou@whut.edu.cn	Ye, Zhaoyu/JTT-5930-2023; xu, yuanyuan/IUM-1709-2023		National Natural Science Foundation of China (NSFC) [52376123, 52211530035, 52106146]	National Natural Science Foundation of China (NSFC)(National Natural Science Foundation of China (NSFC))	This work was supported by National Natural Science Foundation of China (NSFC) under Grant No. 52376123 and No. 52211530035 and NO.52106146.		67	7	7	9	34	ELSEVIER SCI LTD	London	125 London Wall, London, ENGLAND	0016-2361	1873-7153		FUEL	Fuel	APR 1	2024	361
J	Patil, V; Adhikari, S; Cross, P				Patil, Vivek; Adhikari, Sushil; Cross, Phillip			Co-pyrolysis of lignin and plastics using red clay as catalyst in a micro-pyrolyzer	BIORESOURCE TECHNOLOGY			English	Article						Lignin; Co-pyrolysis; Plastics; Red Clay	BIO-OIL; BIOMASS; MUD; POLYPROPYLENE; POLYETHYLENE; CELLULOSE; WASTE; DEPOLYMERIZATION; HZSM-5; YIELD	In the current study, low-density polyethylene and polystyrene were co-pyrolyzed with dealkaline lignin in a micro-reactor at 500 degrees C with and without low-cost red clay catalyst. The products were analyzed with GC-MS/ FID to quantify phenolic compounds, alkanes and alkenes. The synergistic effect between plastics and lignin was studied by comparing the carbon yield of compounds from co-pyro…	[Patil, Vivek; Adhikari, Sushil; Cross, Phillip] Auburn Univ, Biosyst Engn Dept, 350 Mell St, Auburn, AL 36849 USA; [Adhikari, Sushil] Auburn Univ, Ctr Bioenergy & Bioprod, Auburn, AL 36849 USA	Auburn University System; Auburn University; Auburn University System; Auburn University	Adhikari, S (corresponding author), Auburn Univ, Biosyst Engn Dept, 350 Mell St, Auburn, AL 36849 USA.	sushil.adhikari@auburn.edu	Patil, Vivek/GRR-3410-2022	Patil, Vivek/0000-0003-3381-6498	US Department of Agriculture-National Institute of Food and Agriculture [USDA-NIFA-2015-67021-22842]	US Department of Agriculture-National Institute of Food and Agriculture(United States Department of Agriculture (USDA))	The authors would like to acknowledge the US Department of Agriculture-National Institute of Food and Agriculture (USDA-NIFA-2015-67021-22842) for funding this study. The author would also like to express sincere gratitude towards Dr. Jinping Wang for her help and guidance during the ICP-AES analysis.		33	56	58	9	150	ELSEVIER SCI LTD	OXFORD	THE BOULEVARD, LANGFORD LANE, KIDLINGTON, OXFORD OX5 1GB, OXON, ENGLAND	0960-8524	1873-2976		BIORESOURCE TECHNOL	Bioresour. Technol.	DEC	2018	270
J	Valadao, LS; Duarte, CD; de los Santos, DG; Sanches, PJ				Valadao, Lidiane Schmalfuss; Duarte, Caroline dos Santos; de los Santos, Diego Gil; Sanches Filho, Pedro Jose			Conversion of peach endocarp and polyethylene residue by the co-pyrolysis process	ENVIRONMENTAL SCIENCE AND POLLUTION RESEARCH			English	Article						Biomass; Chromatography; Co-pyrolysis; Hydrocarbons; Plastic; Recycling	BIO-OIL; DENSITY POLYETHYLENE; BIOMASS; WASTE; PLASTICS; LEVOGLUCOSAN; MECHANISMS; PARAMETER; CELLULOSE; KINETICS	The south of Brazil has a high production of peaches which generates the stone as residue. The recycling of biomass and plastic waste is a challenge that must be overcome. Therefore, co-pyrolysis emerges as a possibility for joint conversion of peach stone and plastic bags into value-added products. Thus, the objective is to obtain new products, emphasizing the organic fraction of the bio-oil obt…	[Valadao, Lidiane Schmalfuss; Duarte, Caroline dos Santos; de los Santos, Diego Gil; Sanches Filho, Pedro Jose] Inst Fed Educ Ciencia & Tecnol Sul Rio Grandese, Grp Pesquisa Contaminantes Ambientais, Praca 20 Setembro 445, BR-96015360 Pelotas, RS, Brazil		Valadao, LS (corresponding author), Inst Fed Educ Ciencia & Tecnol Sul Rio Grandese, Grp Pesquisa Contaminantes Ambientais, Praca 20 Setembro 445, BR-96015360 Pelotas, RS, Brazil.	lidischmalfuss@gmail.com	Gil de los Santos, Diego/AAD-5139-2022; Filho, Pedro/AAH-7632-2020		Instituto Federal de Educacao, Ciencia e Tecnologia Sulrio-grandense (IFSUL); Conselho Nacional de DesenvolvimentoCientifico e Tecnologico (CNPq); Fundacao de Amparo a Pesquisa do Estado do Rio Grande do Sul (FAPERGS)	Instituto Federal de Educacao, Ciencia e Tecnologia Sulrio-grandense (IFSUL); Conselho Nacional de DesenvolvimentoCientifico e Tecnologico (CNPq)(Conselho Nacional de Desenvolvimento Cientifico e Tecnologico (CNPQ)); Fundacao de Amparo a Pesquisa do Estado do Rio Grande do Sul (FAPERGS)(Fundacao de Amparo a Ciencia e Tecnologia do Estado do Rio Grande do Sul (FAPERGS))	The Instituto Federal de Educacao, Ciencia e Tecnologia Sulrio-grandense (IFSUL) contributed with the physical structure and materials needed to carry out the analyses; the Conselho Nacional de DesenvolvimentoCientifico e Tecnologico (CNPq) and the Fundacao de Amparo a Pesquisa do Estado do Rio Grande do Sul (FAPERGS) provided a research grant at the level of scientific initiation to the collabor…		76	3	3	0	16	SPRINGER HEIDELBERG	HEIDELBERG	TIERGARTENSTRASSE 17, D-69121 HEIDELBERG, GERMANY	0944-1344	1614-7499		ENVIRON SCI POLLUT R	Environ. Sci. Pollut. Res.	FEB	2022	29	7
J	Oyedun, AO; Gebreegziabher, T; Ng, DKS; Hui, CW				Oyedun, Adetoyese Olajire; Gebreegziabher, Tesfaldet; Ng, Denny K. S.; Hui, Chi Wai			Mixed-waste pyrolysis of biomass and plastics waste - A modelling approach to reduce energy usage	ENERGY			English	Article						Co-pyrolysis; Biomass; Plastics; Modelling; Energy	CO-PYROLYSIS; ENTHALPY CHANGE; BINARY-MIXTURE; KINETICS; TEMPERATURE; TYRE; DTA	Thermal co-processing of waste mixtures had gained a lot of attention in the last decade. This is largely due to certain synergistic effects such as higher quantity and better quality of oil, limited supply of certain feedstock and improving the overall pyrolysis process. Many experiments have been conducted via TGA analysis and different reactors to achieve the stated synergistic effects in co-p…	[Oyedun, Adetoyese Olajire; Hui, Chi Wai] Hong Kong Univ Sci & Technol, Dept Chem & Biomol Engn, Kowloon, Hong Kong, Peoples R China; [Gebreegziabher, Tesfaldet] Hong Kong Univ Sci & Technol, Dept Environm Engn, Kowloon, Hong Kong, Peoples R China; [Ng, Denny K. S.] Univ Nottingham, Ctr Excellence Green Technol, Dept Chem & Environm Engn, Semenyih 43500, Selangor, Malaysia	Hong Kong University of Science & Technology; Hong Kong University of Science & Technology; University of Nottingham Malaysia	Hui, CW (corresponding author), Hong Kong Univ Sci & Technol, Dept Chem & Biomol Engn, Kowloon, Hong Kong, Peoples R China.	keoyedun@connect.ust.hk; tgaa@connect.ust.hk; Denny.Ng@nottingham.edu.my; kehui@ust.hk	Oyedun, Adetoyese/AAJ-1382-2020; Hui, Chi-Wai/E-3518-2012; Gebreegziabher, Tesfaldet/IUO-4659-2023; Oyedun, Adetoyese Olajire/HOF-7721-2023; NG, Denny K. S./B-3931-2010	Gebreegziabher, Tesfaldet/0000-0002-5872-4162; Oyedun, Adetoyese Olajire/0000-0001-6722-578X; NG, Denny K. S./0000-0003-4691-8450	Hong Kong RGC [PF09-05997]; Overseas Research Awards	Hong Kong RGC(Hong Kong Research Grants Council); Overseas Research Awards	The authors gratefully acknowledge the support from Hong Kong RGC in form of PhD Fellowship to Oyedun Adetoyese Olajire (PF09-05997) and the Overseas Research Awards for the Research Exchange at University of Nottingham, Malaysia.		27	73	79	3	57	PERGAMON-ELSEVIER SCIENCE LTD	OXFORD	THE BOULEVARD, LANGFORD LANE, KIDLINGTON, OXFORD OX5 1GB, ENGLAND	0360-5442	1873-6785		ENERGY	Energy	OCT 1	2014	75
J	Mushtaq, S; Munir, S; Awan, JA; Akhtar, J				Mushtaq, Sana; Munir, Shahid; Awan, Javeed Ashraf; Akhtar, Javaid			Co-pyrolysis and hydrogenation of Thar coal, waste plastic and waste oil blends for fuel oil production	ENERGY SOURCES PART A-RECOVERY UTILIZATION AND ENVIRONMENTAL EFFECTS			English	Article						Coal; co-pyrolysis; FTIR; fuel oil; GC-MS; NMR; waste plastics	LIQUEFACTION; COLIQUEFACTION; BIOMASS	Co-liquefaction of Thar coal with waste plastic and waste oil was carried out to get high-quality fuel from waste. Four major variables, temperature, residence time, hydrogen pressure and coal: waste plastic ratio, oil: coal and oil: waste plastic ratios were investigated. According to results, maximum oil yield was obtained at 400 degrees C temperature, 100psi pressure, 60 min residence time, an…	[Mushtaq, Sana; Munir, Shahid] Univ Punjab, Ctr Coal Technol, Lahore, Pakistan; [Awan, Javeed Ashraf; Akhtar, Javaid] Univ Punjab, Inst Chem Engn & Technol, Lahore, Pakistan	University of Punjab; University of Punjab	Munir, S (corresponding author), Univ Punjab, Ctr Coal Technol, Lahore, Pakistan.	director.cct@pu.edu.pk		AWAN, Dr. Javeed A./0000-0001-5966-2592					14	12	12	12	62	TAYLOR & FRANCIS INC	PHILADELPHIA	530 WALNUT STREET, STE 850, PHILADELPHIA, PA 19106 USA	1556-7036	1556-7230		ENERG SOURCE PART A	Energy Sources Part A-Recovery Util. Environ. Eff.		2018	40	13
J	Yusoff, Y; Tan, ES; Ismail, FB				Yusoff, Yasirah; Tan, Ee Sann; Ismail, Firas Basim			A Comparison of Feedstock from Agricultural Biomass and Face Masks for the Production of Biochar through Co-Pyrolysis	SUSTAINABILITY			English	Article						pyrolysis; face mask; biomass; sustainability; EFB	BIO-CHAR; CONVERSION; OIL	This study explores the pyrolysis of disposable face masks to produce chemicals suitable for use as fuel, addressing the environmental concern posed by single-use face masks. Co-pyrolysis of biomass with face mask plastic waste offers a promising solution. The research focuses on the co-pyrolysis of biomass and face masks, aiming to characterise the properties for analysis and optimisation. Selec…	[Yusoff, Yasirah] Univ Tenaga Nas, Inst Sustainable Energy, Kajang 43000, Malaysia; [Tan, Ee Sann] Univ Tenaga Nas, Dept Mech Engn, Kajang 43000, Malaysia; [Ismail, Firas Basim] Univ Tenaga Nas, Inst Power Engn, Kajang 43000, Malaysia	Universiti Tenaga Nasional; Universiti Tenaga Nasional; Universiti Tenaga Nasional	Tan, ES (corresponding author), Univ Tenaga Nas, Dept Mech Engn, Kajang 43000, Malaysia.	yasirahyusoff@uniten.edu.my; eesann@uniten.edu.my; firas@uniten.edu.my	Tan, Ee Sann/GLR-4440-2022	Tan, Ee Sann/0000-0002-7977-2729	AAIBE Chair of Renewable Energy at UNITEN	AAIBE Chair of Renewable Energy at UNITEN	The authors would like to acknowledge the direct and indirect contributors to this project and research.		66	0	0	6	13	MDPI	BASEL	ST ALBAN-ANLAGE 66, CH-4052 BASEL, SWITZERLAND		2071-1050		SUSTAINABILITY-BASEL	Sustainability	NOV	2023	15	22
J	Sasaki, Y; Kato, M; Komiyama, M; Loong, GKM; Tanoue, KI				Sasaki, Yuta; Kato, Mai; Komiyama, Masaharu; Loong, Glen Khew Mun; Tanoue, Ken-ichiro			Influence of tar-char interaction on solid fuel formation by co-pyrolysis of bamboo and waste plastic	ENVIRONMENTAL PROGRESS & SUSTAINABLE ENERGY			English	Article						co-pyrolysis; molten plastic wrapping; tar-char interaction	HIGH-GRADE; BIOMASS	Co-pyrolysis of bamboo and plastic powder was conducted in order to investigate how to produce ecological solid fuel. The mixing percentage of the powders w(p) and the setting temperature of the reactor wall T-S were changed. At T-S = 573 K the decomposition of the simulated waste plastic was progressed on the surface of the bamboo char during co-pyrolysis while the tar from bamboo pyrolysis was …	[Sasaki, Yuta; Kato, Mai; Loong, Glen Khew Mun; Tanoue, Ken-ichiro] Yamaguchi Univ, Grad Sch Sci & Technol Innovat, Dept Mech Engn, Yamaguchi, Japan; [Komiyama, Masaharu] Univ Teknol Petronas, HICoE Ctr Biofuel & Biochem Res, Seri Iskandar, Perak, Malaysia	Yamaguchi University; Universiti Teknologi Petronas	Tanoue, KI (corresponding author), Yamaguchi Univ, Grad Sch Sci & Technol Innovat, Dept Mech Engn, Yamaguchi, Japan.	lano@yamaguchi-u.ac.jp			JSPS KAKENHI [21H03664]; ESPEC Foundation for Global Environment Research and Technology	JSPS KAKENHI(Ministry of Education, Culture, Sports, Science and Technology, Japan (MEXT)Japan Society for the Promotion of ScienceGrants-in-Aid for Scientific Research (KAKENHI)); ESPEC Foundation for Global Environment Research and Technology	JSPS KAKENHI, Grant/Award Number: 21H03664; the ESPEC Foundation for Global Environment Research and Technology; ESPEC Foundation for Global Environment Research and Technology		24	2	2	4	21	WILEY	HOBOKEN	111 RIVER ST, HOBOKEN 07030-5774, NJ USA	1944-7442	1944-7450		ENVIRON PROG SUSTAIN	Environ. Prog. Sustain. Energy	JAN	2023	42	1
J	Abnisa, F; Daud, WMAW				Abnisa, Faisal; Daud, Wan Mohd Ashri Wan			A review on co-pyrolysis of biomass: An optional technique to obtain a high-grade pyrolysis oil	ENERGY CONVERSION AND MANAGEMENT			English	Review						Co-pyrolysis; Pyrolysis oil; Biomass waste; Process mechanism; Waste management	MUNICIPAL SOLID-WASTE; PRODUCE BIO-OIL; PLASTIC WASTES; THERMAL-DECOMPOSITION; SCRAP TIRES; PALM SHELL; PART 1; POLYLACTIC ACID; WATER-CONTENT; WOOD BIOMASS	The oil produced by the pyrolysis of biomass has potential for use as a substitute for fossil fuels. However, the oil needs to be upgraded since it contains high levels of oxygen, which causes low caloric value, corrosion problems, and instability. Generally, upgrading the pyrolysis oil involves the addition of a catalyst, solvent and large amount hydrogen, which can cost more than the oil itself…	[Abnisa, Faisal; Daud, Wan Mohd Ashri Wan] Univ Malaya, Fac Engn, Dept Chem Engn, Kuala Lumpur 50603, Malaysia	Universiti Malaya	Abnisa, F (corresponding author), Univ Malaya, Fac Engn, Dept Chem Engn, Kuala Lumpur 50603, Malaysia.	faisal.abnisa@gmail.com; ashri@um.edu.my	DAUD, WAN/C-1022-2010; Abnisa, Faisal/C-4802-2015		University of Malaya through Bright Sparks Program; HIR [D000011-16001]	University of Malaya through Bright Sparks Program; HIR	The authors would like to thank the University of Malaya for fully funding the work described in this publication through the Bright Sparks Program and the HIR Grants (D000011-16001).		143	639	675	21	521	PERGAMON-ELSEVIER SCIENCE LTD	OXFORD	THE BOULEVARD, LANGFORD LANE, KIDLINGTON, OXFORD OX5 1GB, ENGLAND	0196-8904	1879-2227		ENERG CONVERS MANAGE	Energy Conv. Manag.	NOV	2014	87
J	Zhang, YQ; Yu, ZS; Zhang, XK; Ma, XQ				Zhang, Yaqi; Yu, Zhaosheng; Zhang, Xikui; Ma, Xiaoqian			Comparative study on the synergistic co-pyrolysis of Thlaspi arvense L. seed with different plastics: thermal behaviors, product distributions, and kinetics analysis	BIOMASS CONVERSION AND BIOREFINERY			English	Article						Thlaspi arvense L. seed; Plastics; Co-pyrolysis; Synergistic effects; Product distributions; Reaction mechanism	HIGH-DENSITY POLYETHYLENE; CATALYTIC PYROLYSIS; BIODIESEL COMPOSITION; PY-GC/MS; TG-FTIR; BIOMASS; MIXTURES; WASTE; WOOD; POLYSTYRENE	Co-pyrolysis of plastics and biomass turns the environmental burden of waste plastics into opportunities for fuel production. This work comparatively studied the co-pyrolysis characteristics of Thlaspi arvenseL. seed (TS) and several plastics (polyethylene (PE), polypropylene (PS), polyvinyl chloride (PVC)) with different mass fractions. By comparing the co-pyrolysis results of TS-plastic mixture…	[Zhang, Yaqi; Yu, Zhaosheng; Zhang, Xikui; Ma, Xiaoqian] South China Univ Technol, Sch Elect Power, Guangzhou 510640, Peoples R China; [Zhang, Yaqi; Yu, Zhaosheng; Zhang, Xikui; Ma, Xiaoqian] Guangdong Prov Key Lab Efficient & Clean Energy U, Guangzhou 510640, Peoples R China	South China University of Technology	Yu, ZS (corresponding author), South China Univ Technol, Sch Elect Power, Guangzhou 510640, Peoples R China.;Yu, ZS (corresponding author), Guangdong Prov Key Lab Efficient & Clean Energy U, Guangzhou 510640, Peoples R China.	zsyu@scut.edu.cn	Zhang, Yaqi/AAR-9163-2020; Yu, Zhaosheng/T-8028-2019	zhang, xikui/0000-0001-9023-9207; Yu, Zhaosheng/0000-0002-2311-4030	Key Technologies Research and Development Program of China [2018YFC1901200]; National Natural Science Foundation of China [51606071]; Guangdong Basic and Applied Basic Research Foundation [2020A1515010657]; Guangzhou Science and Technology Program Key Projects [201804020082]; Fundamental Research Funds for the Central Universities [2019ZD08]; Key Project (Natural Science) of Guangdong High Educat…	Key Technologies Research and Development Program of China(National Key Technology R&D Program); National Natural Science Foundation of China(National Natural Science Foundation of China (NSFC)); Guangdong Basic and Applied Basic Research Foundation; Guangzhou Science and Technology Program Key Projects; Fundamental Research Funds for the Central Universities(Fundamental Research Funds for the Ce…	This work was supported by the Key Technologies Research and Development Program of China (2018YFC1901200); the National Natural Science Foundation of China (51606071); the Guangdong Basic and Applied Basic Research Foundation (2020A1515010657); the Guangzhou Science and Technology Program Key Projects (201804020082); the Fundamental Research Funds for the Central Universities (2019ZD08); and the…		52	7	7	3	53	SPRINGER HEIDELBERG	HEIDELBERG	TIERGARTENSTRASSE 17, D-69121 HEIDELBERG, GERMANY	2190-6815	2190-6823		BIOMASS CONVERS BIOR	Biomass Convers. Biorefinery	MAY	2023	13	7
J	Yuan, Q; Zhang, JL; Amyotte, P; Zhang, HA; Bu, YJ; Li, C; Liu, ZD; Chen, HY; Li, G; Yuan, CM				Yuan, Qi; Zhang, Jinglin; Amyotte, Paul; Zhang, Haonan; Bu, Yajie; Li, Chang; Liu, Zhengdong; Chen, Haiyan; Li, Gang; Yuan, Chunmiao			Investigation of dust ignition sensitivity and co-pyrolysis properties of biomass and plastic waste during resource utilization	JOURNAL OF LOSS PREVENTION IN THE PROCESS INDUSTRIES			English	Article						Biomass plastic composites (BPCs); Co-pyrolysis; Dust ignition sensitivity; Resource utilization; BP neural network	COMPOSITES; DESIGN; POWDER; ASHES	This study investigated the sensitivity of dust to ignition and the co-pyrolysis properties of biomass-plastic composites (BPCs) during resource utilization process. A model of co-pyrolysis process for four BPCs was developed using a BP neural network algorithm. The addition of polyethylene increased the biomass powder's tendency to pyrolyze. In the main pyrolysis stage, the lignin and polyethyle…	[Yuan, Qi; Zhang, Jinglin; Zhang, Haonan; Liu, Zhengdong; Li, Gang; Yuan, Chunmiao] Northeastern Univ, Fire & Explos Protect Lab, Shenyang 110819, Peoples R China; [Yuan, Qi; Yuan, Chunmiao] Beijing Inst Technol, State Key Lab Explos Sci & Technol, Beijing 100081, Peoples R China; [Amyotte, Paul] Dalhousie Univ, Dept Proc Engn & Appl Sci, Halifax, NS, Canada; [Bu, Yajie] Nanjing Tech Univ, Coll S…	Northeastern University - China; Beijing Institute of Technology; Dalhousie University; Nanjing Tech University; Shenyang Jianzhu University; Shandong University of Science & Technology	Yuan, CM (corresponding author), Northeastern Univ, Fire & Explos Protect Lab, Shenyang 110819, Peoples R China.	yuanchunmiao@mail.neu.edu.cn	Zhang, Jinglin/AAD-2896-2021; Chen, Haiyan/HGB-6216-2022		National Natural Science Foundation of China; Fundamental Research Funds for the Central Universities; Young Researcher Project of the Education Department of Liaoning Province [51974189, 51874070]; Innovative Talents Program of Liaoning Province [N2101003, N2101042]; Liaoning Provincial Natural Science Foundation of China [lnqn202006]; Shenyang Science and Technology Program [XLYC2007089]; State…	National Natural Science Foundation of China(National Natural Science Foundation of China (NSFC)); Fundamental Research Funds for the Central Universities(Fundamental Research Funds for the Central Universities); Young Researcher Project of the Education Department of Liaoning Province; Innovative Talents Program of Liaoning Province; Liaoning Provincial Natural Science Foundation of China; Sheny…	The authors gratefully acknowledge financial support from the National Natural Science Foundation of China (Nos. 51974189, 51874070) , Fundamental Research Funds for the Central Universities (N2101003, N2101042) , Young Researcher Project of the Education Department of Liaoning Province (No. lnqn202006) , Innovative Talents Program of Liaoning Province (No. XLYC2007089) , Liaoning Provincial Natu…		54	3	3	5	20	ELSEVIER SCI LTD	London	125 London Wall, London, ENGLAND	0950-4230	1873-3352		J LOSS PREVENT PROC	J. Loss Prev. Process Ind.	DEC	2023	86
J	Wan Mahari, WA; Chong, CT; Cheng, CK; Lee, CL; Hendrata, K; Yek, PNY; Ma, NL; Lam, SS				Wan Mahari, Wan Adibah; Chong, Cheng Tung; Cheng, Chin Kui; Lee, Chern Leing; Hendrata, Kristian; Yek, Peter Nai Yuh; Ma, Nyuk Ling; Lam, Su Shiung			Production of value-added liquid fuel via microwave co-pyrolysis of used frying oil and plastic waste	ENERGY			English	Article; Proceedings Paper	10th International Conference on Sustainable Energy and Environmental Protection (SEEP)	JUN 27-30, 2017	Univ W Scotland, Inst Engn & Energy Technologies, Bled, SLOVENIA	Univ Maribor, Fac Chem & Chemical Engn	Univ W Scotland, Inst Engn & Energy Technologies	Pyrolysis; Co-pyrolysis; Microwave; Oil; Plastic; Waste; Fuel	HIGH-DENSITY POLYETHYLENE; RECENT PROGRESS; VEGETABLE-OILS; BIO-OIL; THERMOCHEMICAL CONVERSION; CATALYTIC PYROLYSIS; HEATED PYROLYSIS; COOKING-OIL; ENGINE OIL; BIOMASS	The production of household wastes such as used frying oil (UFO) and plastic waste (PW) are increasing each year, thus representing potential feedstocks for conversion into an energy source. Microwave co-pyrolysis was investigated for its potential to transform a mixture of UFO and polyolefinic-based plastic waste into fuel product with desirable properties. The co-pyrolysis approach demonstrated…	[Wan Mahari, Wan Adibah; Yek, Peter Nai Yuh; Lam, Su Shiung] Univ Malaysia Terengganu, Eastern Corridor Renewable Energy Grp ECRE, Sch Ocean Engn, Kuala Nerus 21030, Terengganu, Malaysia; [Chong, Cheng Tung] Shanghai Jiao Tong Univ, China UK Low Carbon Coll, Shanghai 201306, Peoples R China; [Cheng, Chin Kui] Univ Malaysia Pahang, Fac Chem & Nat Resources Engn, Gambang 26300, Pahang, Malaysia; [L…	Universiti Malaysia Terengganu; Shanghai Jiao Tong University; Universiti Malaysia Pahang Al-Sultan Abdullah (UMPSA); Monash University; Monash University Malaysia; University College of Technology Sarawak; Universiti Malaysia Terengganu	Lam, SS (corresponding author), Univ Malaysia Terengganu, Eastern Corridor Renewable Energy Grp ECRE, Sch Ocean Engn, Kuala Nerus 21030, Terengganu, Malaysia.	adibah.mahari@gmail.com; ctchong@mail.fkm.utm.my; chinkui@ump.edu.my; lee.chernleing@monash.edu; kristian.hendrata@monash.edu; peter.yek@ucts.edu.my; nyukling@umt.edu.my; lam@umt.edu.my	Chong, Cheng/Y-8056-2019; Lee, Chern Leing/JNS-1323-2023; Wan Mahari, Wan Adibah/U-8502-2019; YEK, PETER NAI YUH/V-2849-2018; CHENG, CHIN KUI/G-7874-2011; Ma, Nyuk Ling/Q-1474-2018; LAM, SU SHIUNG/K-7436-2012	Lee, Chern Leing/0000-0002-6317-1152; YEK, PETER NAI YUH/0000-0001-7041-0441; CHENG, CHIN KUI/0000-0002-2984-7606; Ma, Nyuk Ling/0000-0002-1301-4730; LAM, SU SHIUNG/0000-0002-5318-1760; Wan Mahari, Wan Adibah/0000-0002-0183-9778; Chong, Cheng Tung/0000-0002-2908-0660	Fundamental Research Grant Scheme [FRGS/1/2016/TX07/UMT/02/3, 59434]	Fundamental Research Grant Scheme	The authors acknowledge the financial support by the Fundamental Research Grant Scheme FRGS/1/2016/TX07/UMT/02/3, Vot 59434.		35	119	123	0	83	PERGAMON-ELSEVIER SCIENCE LTD	OXFORD	THE BOULEVARD, LANGFORD LANE, KIDLINGTON, OXFORD OX5 1GB, ENGLAND	0360-5442	1873-6785		ENERGY	Energy	NOV 1	2018	162
J	Çepeliogullar, Ö; Pütün, AE				Cepeliogullar, Ozge; Putun, Ayse E.			A pyrolysis study for the thermal and kinetic characteristics of an agricultural waste with two different plastic wastes	WASTE MANAGEMENT & RESEARCH			English	Article						Agricultural waste; plastic waste; pyrolysis; thermogravimetric analyzer; fixed bed; thermal and kinetic behaviours	CO-PYROLYSIS; BIOMASS; PET	In this study, thermochemical conversion of plastic wastes (PET and PVC) together with an agricultural waste (hazelnut shell) was investigated. In order to determine the thermal and kinetic behaviours, pyrolysis experiments were carried out from room temperature to 800 degrees C, with a heating rate of 10 degrees C min(-1) in the presence of a N-2 atmosphere in a thermogravimetric analyzer. With …	[Cepeliogullar, Ozge] Istanbul Tech Univ, Dept Chem Engn, TR-34469 Maslak, Turkey; [Putun, Ayse E.] Anadolu Univ, Dept Chem Engn, Eskisehir, Turkey	Istanbul Technical University; Anadolu University	Çepeliogullar, Ö (corresponding author), Istanbul Tech Univ, Fac Chem & Met Engn, Dept Chem Engn, TR-34469 Maslak, Turkey.	cepeliogullar@itu.edu.tr							24	39	45	2	95	SAGE PUBLICATIONS LTD	LONDON	1 OLIVERS YARD, 55 CITY ROAD, LONDON EC1Y 1SP, ENGLAND	0734-242X	1096-3669		WASTE MANAGE RES	Waste Manage. Res.	OCT	2014	32	10
J	Liu, X; Burra, KRG; Wang, ZW; Li, JH; Che, DF; Gupta, AK				Liu, Xuan; Burra, Kiran Raj G.; Wang, Zhiwei; Li, Jinhu; Che, Defu; Gupta, Ashwani K.			Influence of Char Intermediates on Synergistic Effects During Co-Pyrolysis of Pinewood and Polycarbonate	JOURNAL OF ENERGY RESOURCES TECHNOLOGY-TRANSACTIONS OF THE ASME			English	Article						lignocellulosic biomass; waste polycarbonate; co-pyrolysis; synergistic effects; feedstock configuration; alternative energy sources; energy conversion; systems; energy extraction of energy from its natural resource; energy from biomass	LIGNOCELLULOSIC BIOMASS; CATALYTIC PYROLYSIS; STEAM GASIFICATION; BISPHENOL-A; HYDRODEOXYGENATION; SYNGAS; POLYETHYLENE; MECHANISM; WASTES; YIELDS	Combined use of plastic and biomass wastes offers promising pathway for simultaneous energy production and waste disposal. In this article, the co-pyrolysis of pinewood and polycarbonate (PC) was performed in a fixed bed reactor to quantify their synergistic interaction on the product output and determine the effect of char intermediates on the synergistic effects. The extent of synergistic effec…	[Liu, Xuan; Burra, Kiran Raj G.; Wang, Zhiwei; Li, Jinhu; Gupta, Ashwani K.] Univ Maryland, Dept Mech Engn, Combust Lab, College Pk, MD 20742 USA; [Burra, Kiran Raj G.; Che, Defu] Xi An Jiao Tong Univ, Sch Energy & Power Engn, State Key Lab Multiphase Flow Power Engn, Xian 710049, Peoples R China; [Wang, Zhiwei] Henan Univ Technol, Coll Environm Engn, Zhengzhou 450001, Peoples R China; [Li, Jinhu…	University System of Maryland; University of Maryland College Park; Xi'an Jiaotong University; Henan University of Technology; China University of Mining & Technology	Gupta, AK (corresponding author), Univ Maryland, Dept Mech Engn, Combust Lab, College Pk, MD 20742 USA.	liuxuanne@foxmail.com; kiranraj@umd.edu; bioenergy@163.com; ljh_cumt@163.com; dfche@mail.xjtu.edu.cn; akgupta@umd.edu	Wang, Zhi-Wei/P-1561-2018; Li, Jinhu/N-8954-2014; Liu, Xuan/KPA-3316-2024	Liu, Xuan/0000-0002-6857-0566; Gupta, Ashwani/0000-0001-8047-8706	Office of Naval Research; China Scholarship Council [CSC201906280344]; Ann G. Wylie Fellowship	Office of Naval Research(United States Department of DefenseUnited States NavyOffice of Naval Research); China Scholarship Council(China Scholarship Council); Ann G. Wylie Fellowship	This research was supported by Office of Naval Research and their support is gratefully acknowledged. The support provided to the authors (Xuan Liu, Zhiwei Wang, and Jinhu Li) from China Scholarship Council (CSC201906280344) is gratefully acknowledged. The support provided to the author (K.G. Burra) by Ann G. Wylie Fellowship is gratefully acknowledged.		37	16	17	5	45	ASME	NEW YORK	TWO PARK AVE, NEW YORK, NY 10016-5990 USA	0195-0738	1528-8994		J ENERG RESOUR-ASME	J. Energy Resour. Technol.-Trans. ASME	MAY 1	2021	143	5
J	Sajdak, M				Sajdak, Marcin			Impact of plastic blends on the product yield from co-pyrolysis of lignin-rich materials	JOURNAL OF ANALYTICAL AND APPLIED PYROLYSIS			English	Article						Co-pyrolysis; Lignin-rich materials; Plastic waste blends; DoE; ANOVA; ECE	HIGH-DENSITY POLYETHYLENE; MUNICIPAL SOLID-WASTE; THERMAL-DEGRADATION; CATALYTIC PYROLYSIS; MIXED-PLASTICS; BED REACTOR; FUEL-OIL; PART II; BIOMASS; MIXTURES	Co-pyrolysis of lignin-rich materials with two types of plastic waste blends was evaluated. Blend 1 (B1) comprised 30% m/m styrene-butadiene rubber (SBR, from rubber granules used tires), 40% m/m polyethylene terephthalate (PET, from scrap bottles), and 30% m/m polypropylene (PP, from scrap bumpers). Blend 2 (B2) comprised 40% m/m PET (from scrap bottles), 30% m/m PP (from automotive scrap), and …	[Sajdak, Marcin] Inst Chem Proc Coal, 1 Zamkowa St, PL-41803 Zabrze, Poland	Institute for Chemical Processing of Coal	Sajdak, M (corresponding author), Inst Chem Proc Coal, 1 Zamkowa St, PL-41803 Zabrze, Poland.	msajdak@ichpw.pl	Sajdak, Marcin/LLK-6607-2024; Sajdak, Marcin/C-9554-2019	Sajdak, Marcin/0000-0001-6037-7748	Ministry of Science and Higher Education under the Iuventus Plus Program [IP2014 041073]; Ministry of Science and Higher Education under GEKON Program - The National Centre for Research and Development [GEKON2/05/268002/17/2015]; National Fund for Environmental Protection and Water Management	Ministry of Science and Higher Education under the Iuventus Plus Program; Ministry of Science and Higher Education under GEKON Program - The National Centre for Research and Development; National Fund for Environmental Protection and Water Management	This research was carried out at the Institute for Chemical Processing of Coal in Poland and co-funded by the Ministry of Science and Higher Education under the Iuventus Plus Program for 2015-2016 (project No. IP2014 041073) and the GEKON Program (project No. GEKON2/05/268002/17/2015) co-funded by The National Centre for Research and Development and the National Fund for Environmental Protection …		57	46	49	1	65	ELSEVIER SCIENCE BV	AMSTERDAM	PO BOX 211, 1000 AE AMSTERDAM, NETHERLANDS	0165-2370	1873-250X		J ANAL APPL PYROL	J. Anal. Appl. Pyrolysis	MAR	2017	124
J	Lim, HY; Tang, SH; Chai, YH; Yusup, S; Lim, MT				Lim, Huei Yeong; Tang, Shu Hui; Chai, Yee Ho; Yusup, Suzana; Lim, Mook Tzeng			Co-pyrolysis of plastics and food waste mixture under flue gas condition for bio-oil production	SUSTAINABLE ENERGY TECHNOLOGIES AND ASSESSMENTS			English	Article						Co-pyrolysis; Bio-oil; Plastics waste; Food waste; Biofuel	BONE; BIOMASS; PERFORMANCE; TECHNOLOGY; CONVERSION; DIGESTION; IMPACTS; STALK	Growing global population increased the energy demand and generation of municipal solid wastes (MSW). MSW can be utilized to produce green renewable fuels via pyrolysis technology. This study investigated the co -pyrolysis of MSW represented by mixtures of food and plastic wastes, in a downdraft pyrolyzer using syn-thetic flue gas composition. The food wastes in this study included fish and chick…	Univ Teknol Petronas, Dept Chem Engn, Seri Iskandar, Perak, Malaysia; [Lim, Huei Yeong; Tang, Shu Hui; Chai, Yee Ho] Univ Teknol Petronas, Biomass Proc Lab, HICOE Ctr Biofuel & Biochem Res CBBR, Inst Sustainable Bldg, Seri Iskandar, Perak, Malaysia; [Yusup, Suzana] TNB Res Sdn Bhd, Generat Unit Fuel & Combust Sect, Kuala Lumpur, Selangor, Malaysia; [Lim, Mook Tzeng] TNB Res Sdn Bhd, Biomass & Pla…	Universiti Teknologi Petronas; Universiti Teknologi Petronas; INTI International University	Chai, YH (corresponding author), Univ Teknol Petronas, Biomass Proc Lab, HICOE Ctr Biofuel & Biochem Res CBBR, Inst Sustainable Bldg, Seri Iskandar, Perak, Malaysia.	yeeho.chai@utp.edu.my	Yusup, Suzana/F-8805-2012; Lim, Mook/I-2135-2019	Lim, Huei Yeong/0000-0002-0210-3383; yusup, suzana/0000-0003-4790-3613	Tenaga Nasional Berhad [TNBR/SF367/2020]; HICoE grant from Ministry of Higher Education Malaysia [015MA0-014]	Tenaga Nasional Berhad; HICoE grant from Ministry of Higher Education Malaysia	This work was supported by Tenaga Nasional Berhad (TNBR/SF367/2020) ; and HICoE grant (cost centre: 015MA0-014) from Ministry of Higher Education Malaysia.		52	9	11	10	26	ELSEVIER	AMSTERDAM	RADARWEG 29, 1043 NX AMSTERDAM, NETHERLANDS	2213-1388	2213-1396		SUSTAIN ENERGY TECHN	Sustain. Energy Technol. Assess.	DEC	2022	54
J	Sabat, G; Gouda, N; Mahapatra, PM; Mahakhud, R; Panda, AK				Sabat, Gayatri; Gouda, Narayan; Mahapatra, Pabitra Mohan; Mahakhud, Rutuparna; Panda, Achyut K.			Co-pyrolysis of beeswax with different consumer plastics for synergetic production of sustainable fuel oil	SUSTAINABLE ENERGY TECHNOLOGIES AND ASSESSMENTS			English	Article						Co-pyrolysis; Waste plastics; Beeswax; Thermogravimetric analysis; Kinetics; Thermodynamics	THERMAL-DEGRADATION; KINETICS; WASTE; BIOMASS; PARAMETERS; BEHAVIORS	Pyrolysis is one of the most popular recycling techniques for the valorization of plastic wastes into liquid/gaseous fuels as major products. However, the process is highly energy expensive and needs attention. In this context, four different kinds of waste plastics viz. polypropylene (PP), High-density polyethylene (HDPE), Polystyrene (PS), and Polymethylene methacrylate (PMMA) are subjected to …	[Sabat, Gayatri; Mahapatra, Pabitra Mohan; Mahakhud, Rutuparna; Panda, Achyut K.] Veer Surendra Sai Univ Technol Burla, Dept Chem, Burla 768018, Odisha, India; [Gouda, Narayan] Centurion Univ Technol & Management, Dept Chem, Sch Appl Sci, Parlakhemundi 761211, Odisha, India	Veer Surendra Sai University of Technology; Centurion University of Technology & Management	Panda, AK (corresponding author), Veer Surendra Sai Univ Technol Burla, Dept Chem, Burla 768018, Odisha, India.	akpanda.chem@vssut.ac.in	Gouda, Narayan/AAY-3768-2020; Panda, Achyut/AGV-2089-2022						26	14	14	1	11	ELSEVIER	AMSTERDAM	RADARWEG 29, 1043 NX AMSTERDAM, NETHERLANDS	2213-1388	2213-1396		SUSTAIN ENERGY TECHN	Sustain. Energy Technol. Assess.	OCT	2022	53		A
J	Ding, ZY; Liu, JY; Chen, HS; Huang, SZ; Evrendilek, F; He, Y; Zheng, L				Ding, Ziyi; Liu, Jingyong; Chen, Huashan; Huang, Shengzheng; Evrendilek, Fatih; He, Yao; Zheng, Li			Co-pyrolysis performances, synergistic mechanisms, and products of textile dyeing sludge and medical plastic wastes	SCIENCE OF THE TOTAL ENVIRONMENT			English	Article						Sludge; Polyolefin plastics; Pyrolytic oils; Volatiles products; Circular economy	HIGH-DENSITY POLYETHYLENE; SEWAGE-SLUDGE; TG-FTIR; PY-GC/MS; AUGER REACTOR; HEAVY-METALS; BEHAVIORS; KINETICS; BIOMASS; COMBUSTION	This study aimed to quantify the co-pyrolysis of textile dyeing sludge (TDS) and the two medical plastic wastes of syringes (SY) and medical bottles (MB) in terms of their performances, synergistic mechanisms, and products. The pyrolysis of polyolefin plastics with its high calorific value and low ash content can offset the poor monopyrolytic performance of TDS. The synergistic mechanisms occurre…	[Ding, Ziyi; Liu, Jingyong; Huang, Shengzheng; He, Yao; Zheng, Li] Guangdong Univ Technol, Sch Environm Sci & Engn, Guangzhou 510006, Peoples R China; [Chen, Huashan] Guoke Foshan Testing & Certificat Co Ltd, Foshan 528000, Peoples R China; [Evrendilek, Fatih] Abant Izzet Baysal Univ, Dept Environm Engn, TR-14052 Bolu, Turkey	Guangdong University of Technology; Abant Izzet Baysal University	Liu, JY (corresponding author), Guangdong Univ Technol, Sch Environm Sci & Engn, Guangzhou 510006, Peoples R China.	Liujy@gdut.edu.cn	He, Yao/HKO-5591-2023; Ding, Ziyi/KCY-1557-2024; Evrendilek, Fatih/O-2424-2013	Evrendilek, Fatih/0000-0003-1099-4363	National Natural Science Foundation of China [51978175]; Scientific and Technological Planning Project of Guangzhou, China [202103000004]; Science and Technology Planning Project of Yunfu, Guangdong Province, China [2020040401]; Science and Technology Planning Project of Shaoguan, Guangdong Province, China [2019SN114]	National Natural Science Foundation of China(National Natural Science Foundation of China (NSFC)); Scientific and Technological Planning Project of Guangzhou, China; Science and Technology Planning Project of Yunfu, Guangdong Province, China; Science and Technology Planning Project of Shaoguan, Guangdong Province, China	This work was financially supported by the National Natural Science Foundation of China (No. 51978175) , the Scientific and Technological Planning Project of Guangzhou, China (No. 202103000004) , the Science and Technology Planning Project of Yunfu, Guangdong Province, China (No. 2020040401) , and the Science and Technology Planning Project of Shaoguan, Guangdong Province, China (No. 2019SN114) .		82	66	67	6	108	ELSEVIER	AMSTERDAM	RADARWEG 29, 1043 NX AMSTERDAM, NETHERLANDS	0048-9697	1879-1026		SCI TOTAL ENVIRON	Sci. Total Environ.	DEC 10	2021	799
J	Sajdak, M; Slowik, K				Sajdak, M.; Slowik, K.			Use of plastic waste as a fuel in the co-pyrolysis of biomass: Part II. Variance analysis of the co-pyrolysis process	JOURNAL OF ANALYTICAL AND APPLIED PYROLYSIS			English	Article						Biochar; Biomass; Solid fuels properties; Plastics waste; ANOVA	OPTIMIZATION; TEMPERATURE	The aim of our study described in this article was statistical evaluation of the influence of process conditions on the chemical and physical properties of products obtained from biomass and plastic waste co-pyrolysis. To estimate the effects of the process conditions on the chemical and physical properties of products, analysis of variance (ANOVA) was used. Furthermore, a mathematical equation t…	[Sajdak, M.; Slowik, K.] Inst Chem Proc Coal, PL-41803 Zabrze, Poland	Institute for Chemical Processing of Coal	Sajdak, M (corresponding author), Inst Chem Proc Coal, 1 Zamkowa St, PL-41803 Zabrze, Poland.	msajdak@ichpw.zabrze.pl	Sajdak, Marcin/LLK-6607-2024; Sajdak, Marcin/C-9554-2019	Sajdak, Marcin/0000-0001-6037-7748	NCBiR [SP/E/4/65786/10]	NCBiR	These studies were co-funded under the budget of research task No. 4 Development of integrated technology of fuels and energy from biomass, agricultural waste, and others as part of the strategic program of research and development: Advanced technology of obtaining energy provided by the NCBiR grant number SP/E/4/65786/10.		22	35	37	1	42	ELSEVIER SCIENCE BV	AMSTERDAM	PO BOX 211, 1000 AE AMSTERDAM, NETHERLANDS	0165-2370	1873-250X		J ANAL APPL PYROL	J. Anal. Appl. Pyrolysis	SEP	2014	109
J	Oyedun, AO; Tee, CZ; Hanson, S; Hui, CW				Oyedun, Adetoyese Olajire; Tee, Choun Zhi; Hanson, Svenja; Hui, Chi Wai			Thermogravimetric analysis of the pyrolysis characteristics and kinetics of plastics and biomass blends	FUEL PROCESSING TECHNOLOGY			English	Article						Co-pyrolysis; Thermogravimetric analysis (TGA); Kinetics; Biomass; Plastics; Synergic effect	CO-PYROLYSIS; WASTE; BEHAVIORS	The thermal behavior of plastics (PS and HDPE) and their blends with biomass (bamboo, empty fruit bunch and sawdust) was investigated in this paper. The individual devolatilization behavior of each of the fuels obtained separately was compared with the behavior of the biomass blends with plastics at various blends. The result shows that the thermal decomposition of the materials can be characteri…	[Oyedun, Adetoyese Olajire; Hui, Chi Wai] Hong Kong Univ Sci & Technol, Dept Chem & Biomol Engn, Kowloon, Hong Kong, Peoples R China; [Tee, Choun Zhi; Hanson, Svenja] Univ Nottingham, Dept Chem & Environm Engn, Semenyih 43500, Selangor, Malaysia	Hong Kong University of Science & Technology; University of Nottingham Malaysia	Hui, CW (corresponding author), Hong Kong Univ Sci & Technol, Dept Chem & Biomol Engn, Clear Water Bay, Kowloon, Hong Kong, Peoples R China.	keoyedun@connect.ust.hk; Choun-Zhi.Tee@nottingham.edu.my; Svenja.Hanson@nottingham.edu.my; kehui@ust.hk	Oyedun, Adetoyese/AAJ-1382-2020; Hui, Chi-Wai/E-3518-2012; Oyedun, Adetoyese Olajire/HOF-7721-2023	Oyedun, Adetoyese Olajire/0000-0001-6722-578X	Hong Kong RGC [PF09-05997]; Overseas Research Awards, HKUST for the Research Exchange at University of Nottingham, Malaysia	Hong Kong RGC(Hong Kong Research Grants Council); Overseas Research Awards, HKUST for the Research Exchange at University of Nottingham, Malaysia	The authors gratefully acknowledge the support from Hong Kong RGC in form of PhD Fellowship to Oyedun Adetoyese Olajire (PF09-05997) and Overseas Research Awards, HKUST for the Research Exchange at University of Nottingham, Malaysia.		23	169	178	5	115	ELSEVIER SCIENCE BV	AMSTERDAM	PO BOX 211, 1000 AE AMSTERDAM, NETHERLANDS	0378-3820	1873-7188		FUEL PROCESS TECHNOL	Fuel Process. Technol.	DEC	2014	128
J	Zulkafli, AH; Hassan, H; Ahmad, MA; Din, ATM; Wasli, SM				Zulkafli, Aizatul Hikmah; Hassan, Hamizura; Ahmad, Mohd Azmier; Din, Azam Taufik Mohd; Wasli, Siti Maryam			Co-pyrolysis of biomass and waste plastics for production of chemicals and liquid fuel: A review on the role of plastics and catalyst types	ARABIAN JOURNAL OF CHEMISTRY			English	Review						Biomass; Plastic waste; Co-pyrolysis; Zeolite; Low-cost mineral-based cat-alyst; Bio-oil	HIGH-DENSITY POLYETHYLENE; BIO-OIL PRODUCTION; ZSM-5 ZEOLITES; THERMAL-BEHAVIOR; HIERARCHICAL Y; SLOW PYROLYSIS; CELLULOSE; CONVERSION; LIGNIN; HZSM-5	The increasing global fuel consumption and growing environmental concerns are the impe-tuses to explore alternative energy that is clean and renewable for fuel production. Converting biomass and plastic waste into high-value fuel and chemicals via co-pyrolysis technique may provide a sustain-able remediation to this problem. This review critically discussed the influence of various types of plas-…	[Zulkafli, Aizatul Hikmah; Hassan, Hamizura; Wasli, Siti Maryam] Univ Teknol MARA, Ctr Chem Engn Studies, Permatang Pauh Campus, George Town 13500, Malaysia; [Hassan, Hamizura] Univ Teknol MARA, Ctr Chem Engn Studies, Waste Management & Resource Recovery WeResCue Grp, Cawangan Pulau Pinang 13500, Penang, Malaysia; [Ahmad, Mohd Azmier; Din, Azam Taufik Mohd] Univ Sains Malaysia, Sch Chem Engn, Eng…	Universiti Teknologi MARA; Universiti Sains Malaysia	Hassan, H (corresponding author), Univ Teknol MARA, Ctr Chem Engn Studies, Permatang Pauh Campus, George Town 13500, Malaysia.;Hassan, H (corresponding author), Univ Teknol MARA, Ctr Chem Engn Studies, Waste Management & Resource Recovery WeResCue Grp, Cawangan Pulau Pinang 13500, Penang, Malaysia.;Ahmad, MA (corresponding author), Univ Sains Malaysia, Sch Chem Engn, Engn Campus, Nibong Tebal 143…	hamizura179@uitm.edu.my; chazmier@usm.my	Hassan, Hamizura/HDO-2268-2022; Ahmad, Mohd Azmier/B-3246-2011; Mohd Din, Azam Taufik/A-4774-2012	Hassan, Hamizura/0000-0003-2266-2315; Ahmad, Mohd Azmier/0000-0001-8412-2491; Mohd Din, Azam Taufik/0000-0002-9075-5989	Lotte Chemical Titan (M) Sdn. Bhd.; Universiti Sains Malaysia [304/PJKIMIA/6050422/L128]; Universiti Teknologi MARA [600-RMC/GIP 5/3 (045/2021)]	Lotte Chemical Titan (M) Sdn. Bhd.; Universiti Sains Malaysia(Universiti Sains Malaysia); Universiti Teknologi MARA	The authors thankfully acknowledge the support obtained from Lotte Chemical Titan (M) Sdn. Bhd. and Universiti Sains Malaysia (Grant No: 304/PJKIMIA/6050422/L128) , in the form of research grant and facilities which brought forth this article. The first and second authors also acknowledge the research grant provided by Universiti Teknologi MARA, under Research Incentive Grant (Grant No: 600-RMC/G…		110	25	25	9	77	ELSEVIER	AMSTERDAM	RADARWEG 29, 1043 NX AMSTERDAM, NETHERLANDS	1878-5352	1878-5379		ARAB J CHEM	Arab. J. Chem.	JAN	2023	16	1
J	Özsin, G; Pütün, AE				Ozsin, Gamzenur; Putun, Ayse Eren			A comparative study on co-pyrolysis of lignocellulosic biomass with polyethylene terephthalate, polystyrene, and polyvinyl chloride: Synergistic effects and product characteristics	JOURNAL OF CLEANER PRODUCTION			English	Article						Biomass; Polyethylene terephthalate; Polystyrene; Polyvinyl chloride; Pyrolysis	HIGH-DENSITY POLYETHYLENE; AROMATIC-HYDROCARBON PRODUCTION; MUNICIPAL SOLID-WASTE; BIO-OIL PRODUCTION; PLASTIC MIXTURES; BED REACTOR; HYDROTHERMAL CARBONIZATION; RENEWABLE RESOURCES; THERMAL-CONVERSION; RESIDENCE TIME	Co-pyrolysis of waste biomass and plastics was investigated to find out whether the quality of pyrolysis products was improved. For the sake of yield and compositional comparison, three polymers (polyethylene terephthalate, polystyrene, and polyvinyl chloride) and two biomasses (walnut shells and peach stones) were tested in a fixed bed reactor. The maximum bio-oil yield was obtained at 500 degre…	[Ozsin, Gamzenur] Bilecik Seyh Edebali Univ, Dept Chem Engn, Fac Engn, TR-11210 Bilecik, Turkey; [Putun, Ayse Eren] Anadolu Univ, Dept Chem Engn, Fac Engn, TR-26555 Eskisehir, Turkey	Bilecik Seyh Edebali University; Anadolu University	Özsin, G (corresponding author), Bilecik Seyh Edebali Univ, Dept Chem Engn, Fac Engn, TR-11210 Bilecik, Turkey.	gozsin@anadolu.edu.tr	ÖZSİN, Gamzenur/O-5131-2019		TUBITAK through BIDEB fund [2214-A]	TUBITAK through BIDEB fund	The authors gratefully acknowledge the financial support for this research by the TUBITAK through BIDEB 2214-A fund.		68	122	131	7	226	ELSEVIER SCI LTD	OXFORD	THE BOULEVARD, LANGFORD LANE, KIDLINGTON, OXFORD OX5 1GB, OXON, ENGLAND	0959-6526	1879-1786		J CLEAN PROD	J. Clean Prod.	DEC 20	2018	205
J	Anandaram, H; Srivastava, BK; Vijayakumar, B; Madhu, P; Depoures, MV; Patil, PP; Chhabria, S; Patel, PB; Prabhakar, S				Anandaram, Harishchander; Srivastava, Bipin Kumar; Vijayakumar, B.; Madhu, P.; Depoures, Melvin Victor; Patil, Pravin P.; Chhabria, Sarika; Patel, Praveen Bhai; Prabhakar, S.			Co-pyrolysis Characteristics and Synergistic Interaction of Waste Polyethylene Terephthalate and Woody Biomass towards Bio-Oil Production	JOURNAL OF CHEMISTRY			English	Article							HIGH-DENSITY POLYETHYLENE; THERMOCHEMICAL CONVERSION; LIGNOCELLULOSIC BIOMASS; FICUS-BENGHALENSIS; SLOW PYROLYSIS; PET; PLASTICS; YIELDS; SHELL; FUEL	In this study, the impacts of co-pyrolyzing wood-based biomass from Ficus benghalensis with PET on liquid oil output, reactivity, and heating values were investigated. The effects of temperature on the product distribution of individual pyrolysis and the biomass-plastic ratio on co-pyrolysis were investigated. For individual pyrolysis, a maximum amount of 40.8 wt (%) liquid oil was obtained from …	[Anandaram, Harishchander] Amrita Vishwa Vidyapeetham, Ctr Excellence Computat Engn & Networking, Coimbatore 641112, Tamil Nadu, India; [Srivastava, Bipin Kumar] Galgotias Coll Engn & Technol, Dept Appl Sci, Greater Noida 201306, Uttar Pradesh, India; [Vijayakumar, B.] Panimalar Engn Coll, Dept Chem, Chennai 600123, Tamil Nadu, India; [Madhu, P.] Karpagam Coll Engn, Dept Mech Engn, Coimbatore 641…	Amrita Vishwa Vidyapeetham; Amrita Vishwa Vidyapeetham Coimbatore; Galgotias College of Engineering & Technology (GCET); Karpagam College of Engineering; Saveetha Institute of Medical & Technical Science; Saveetha School of Engineering; Graphic Era University	Depoures, MV (corresponding author), Saveetha Inst Med & Tech Sci, Saveetha Sch Engn, Dept Thermal Engn, Chennai 600124, Tamil Nadu, India.;Prabhakar, S (corresponding author), Wollo Univ KIOT, Dept Mech Engn, Automot Engn Stream, Kombolcha 208, Ethiopia.	harishchander.ana@yahoo.com; bipinkumarsrivastavab@gmail.com; bvk3011@gmail.com; pnpmadhu@gmail.com; melvin.mech02@gmail.com; patilppravin84@gmail.com; sarika_chhh@yahoo.com; pbhai29@gmail.com; prabhakar@kiot.edu.et	Patil, Pravin/AAI-1160-2019; B, Dr. VIJAYAKUMAR/HKW-2334-2023; ANANDARAM, HARISHCHANDER/I-6988-2016; Srivastava, Dr Bipin/IQT-2681-2023; Madhu, Petchimuthu/ACN-3724-2022; DE POURES, MELVIN VICTOR/AAG-7109-2019	ANANDARAM, HARISHCHANDER/0000-0003-2993-5304; Patel, Dr. Praveen Bhai/0000-0002-6380-7413; B, VIJAYAKUMAR/0000-0003-1927-5445; DE POURES, MELVIN VICTOR/0000-0001-6896-8438; Madhu, P/0000-0001-8599-219X; s, prabhakar/0000-0002-7595-1770					55	19	20	8	43	WILEY	HOBOKEN	111 RIVER ST, HOBOKEN 07030-5774, NJ USA	2090-9063	2090-9071		J CHEM-NY	J. Chem.	SEP 26	2022	2022
J	Pradhan, D; Volli, V; Singh, RK; Murgun, S				Pradhan, Debalaxmi; Volli, Vikranth; Singh, R. K.; Murgun, S.			Co -pyrolysis behavior, engine performance characteristics, and thermodynamics of liquid fuels from mahua seeds and waste thermocol: A comprehensive study	CHEMICAL ENGINEERING JOURNAL			English	Article							COMBUSTION CHARACTERISTICS; THERMAL-DEGRADATION; MADHUCA-INDICA; OIL BLENDS; BIOMASS; DIESEL; BIODIESEL; KINETICS; EMISSION; PLASTICS		[Pradhan, Debalaxmi; Singh, R. K.] Natl Inst Technol, Dept Chem Engn, Rourkela, India; [Murgun, S.] Natl Inst Technol, Dept Mech Engn, Rourkela, India; [Volli, Vikranth] Natl Yunlin Univ Sci & Technol, Dept Safety Hlth & Environm Engn, Touliu, Taiwan	National Institute of Technology (NIT System); National Institute of Technology Rourkela; National Institute of Technology (NIT System); National Institute of Technology Rourkela; National Yunlin University Science & Technology	Pradhan, D (corresponding author), Natl Inst Technol, Dept Chem Engn, Rourkela, India.;Volli, V (corresponding author), Natl Yunlin Univ Sci & Technol, Dept Safety Hlth & Environm Engn, Touliu, Taiwan.	debalaxmichemical@gmail.com; vikranth@yuntech.edu.tw	SINGH, RAGHUBANSH/AAQ-2623-2020						53	27	27	1	20	ELSEVIER SCIENCE SA	LAUSANNE	PO BOX 564, 1001 LAUSANNE, SWITZERLAND	1385-8947	1873-3212		CHEM ENG J	Chem. Eng. J.	AUG 1	2020	393
J	Wei, ZH; Li, YJ; Wang, YZ; He, ZR				Wei, Zihao; Li, Yingjie; Wang, Yuzhuo; He, Zirui			Mechanism investigations on co-pyrolysis of polyethylene and biomass using ReaxFF simulation and DFT computation	JOURNAL OF ENVIRONMENTAL CHEMICAL ENGINEERING			English	Article						Biomass; Plastics; Co-pyrolysis; Reactive molecular dynamics; Density functional theory	MOLECULAR DYNAMIC SIMULATION; SOOT FORMATION; DENSITY; COMBUSTION; BEHAVIOR	Co-pyrolysis of plastics and biomass is a promising solution for waste management and renewable energy uti-lization. There is still no consensus on the distributions of co-pyrolysis products and the reaction mechanisms between the polyethylene (PE) plastics and biomass components at the molecular level. In this work, the product distribution, co-pyrolysis mechanism, and electronic characteristic …	[Wei, Zihao; Li, Yingjie] Shandong Univ, Sch Energy & Power Engn, Jinan 250061, Peoples R China; [Wang, Yuzhuo] Univ Durham, Dept Engn, Fac Sci, Durham DH1 3LE, England; [He, Zirui] Nanyang Technol Univ, Sch Chem Chem Engn & Biotechnol, Singapore 637459, Singapore	Shandong University; Durham University; Nanyang Technological University	Li, YJ (corresponding author), Shandong Univ, Sch Energy & Power Engn, Jinan 250061, Peoples R China.	liyj@sdu.edu.cn	he, zirui/AFZ-4741-2022		Shandong Provincial Natural Science Foundation, China [ZR2020KE042]	Shandong Provincial Natural Science Foundation, China(Natural Science Foundation of Shandong Province)	This work was supported by the Shandong Provincial Natural Science Foundation, China (ZR2020KE042). The scientific calculations in this paper have been done on the HPC Cloud Platform of Shandong University.		67	11	11	16	66	ELSEVIER SCI LTD	London	125 London Wall, London, ENGLAND	2213-2929	2213-3437		J ENVIRON CHEM ENG	J. Environ. Chem. Eng.	OCT	2023	11	5
J	Salman, B; Ong, MY; Nomanbhay, S; Salema, AA; Sankaran, R; Show, PL				Salman, Bello; Ong, Mei Yin; Nomanbhay, Saifuddin; Salema, Arshad Adam; Sankaran, Revathy; Show, Pau Loke			Thermal Analysis of Nigerian Oil Palm Biomass with Sachet-Water Plastic Wastes for Sustainable Production of Biofuel	PROCESSES			English	Article						sachet-water plastic waste; oil palm empty fruit bunch; TGA-DSC analysis; activation energy; physio-thermal analysis; co-pyrolysis	EMPTY FRUIT BUNCH; LOW-DENSITY POLYETHYLENE; CO-PYROLYSIS; KINETIC-PARAMETERS; RECENT PROGRESS; WOOD BIOMASS; BEHAVIOR; CONVERSION; DSC; TECHNOLOGY	Nigeria, being the world's largest importer of diesel-powered gen-sets, is expected to invest in bio-fuels in the future. Hence, it is important to examine the thermal properties and synergy of wastes for potential downstream resource utilization. In this study, thermal conversion as a route to reduce the exploding volume of wastes from sachet-water plastic (SWP) and oil palm empty fruit bunch (O…	[Salman, Bello; Ong, Mei Yin; Nomanbhay, Saifuddin] Univ Tenaga Nas, Energy Univ, ISE, Jalan IKRAM UNITEN, Kajang 43000, Malaysia; [Salema, Arshad Adam] Monash Univ Malaysia, Sch Engn, Jalan Lagoon Selatan, Bandar Sunway 46150, Malaysia; [Sankaran, Revathy] Univ Malaya, Fac Sci, Inst Biol Sci, Kuala Lumpur 50603, Malaysia; [Show, Pau Loke] Fac Sci & Engn, Dept Chem & Environm Engn, Jalan Broga, S…	Universiti Tenaga Nasional; Monash University; Monash University Malaysia; Universiti Malaya	Nomanbhay, S (corresponding author), Univ Tenaga Nas, Energy Univ, ISE, Jalan IKRAM UNITEN, Kajang 43000, Malaysia.;Show, PL (corresponding author), Fac Sci & Engn, Dept Chem & Environm Engn, Jalan Broga, Semenyih 43500, Malaysia.	saifuddin@uniten.edu.my; pauloke.show@nottingham.edu.my	Sankaran, Revathy/ABF-5287-2020; SALMAN, BELLO/AAB-7033-2020; Pau Loke, Show/A-7953-2015; Salema, Arshad/G-1682-2010; Ong, Mei/AAK-2258-2021; Nomanbhay, Saifuddin/L-1853-2015	SALMAN, BELLO/0000-0003-3019-1592; Nomanbhay, Saifuddin/0000-0002-1223-6788; Sankaran, Revathy/0000-0003-3659-1431	TNB Seed Fund [U-TR-RD-18-11]; iRMC UNITEN [RJO10436494]	TNB Seed Fund; iRMC UNITEN	This work was funded by TNB Seed Fund (code: U-TR-RD-18-11). A note of appreciation to iRMC UNITEN for the financial support through publication fund BOLD 2025 (RJO10436494).		59	17	17	1	15	MDPI	BASEL	ST ALBAN-ANLAGE 66, CH-4052 BASEL, SWITZERLAND		2227-9717		PROCESSES	Processes	JUL	2019	7	7
J	Dada, TK; Islam, MA; Vuppaladadiyam, AK; Antunes, E				Dada, Tewodros Kassa; Islam, Md Anwarul; Vuppaladadiyam, Arun K.; Antunes, Elsa			Thermo-catalytic co-pyrolysis of ironbark sawdust and plastic waste over strontium loaded hierarchical Y-zeolite	JOURNAL OF ENVIRONMENTAL MANAGEMENT			English	Article						Catalyst; Co-pyrolysis; Hierarchal zeolite; Plastic waste; Strontium; Wood biomass	HIGH-DENSITY POLYETHYLENE; TRANSESTERIFICATION CATALYST; BIOFUEL PRODUCTION; ALKALINE TREATMENT; CITRIC-ACID; BIOMASS; ZSM-5; PERFORMANCE; CONVERSION; AROMATICS	The objective of this research is to synthesize hierarchical strontium loaded Y-zeolite and study its application for ironbark (IB) and plastic waste (PW) co-pyrolysis. Commercial parent Y-zeolite (Si/Al = 2.48) was modified via sequential dealumination-desilication using citric acid and NaOH. Further, strontium (8 wt %) was loaded into the modified Y-zeolite via wet and dry impregnation methods.…	[Dada, Tewodros Kassa; Islam, Md Anwarul; Vuppaladadiyam, Arun K.; Antunes, Elsa] James Cook Univ, Coll Sci & Engn, Townsville, Qld 4811, Australia	James Cook University	Antunes, E (corresponding author), James Cook Univ, Coll Sci & Engn, Townsville, Qld 4811, Australia.	elsa.antunes1@jcu.edu.au	Islam, Md Anwarul/KHY-8252-2024; Vuppaladadiyam, Arun Krishna/AAE-7934-2019	Vuppaladadiyam, Arun Krishna/0000-0001-6340-5601; Islam, Md Anwarul/0000-0003-3801-3926					91	10	10	5	65	ACADEMIC PRESS LTD- ELSEVIER SCIENCE LTD	LONDON	24-28 OVAL RD, LONDON NW1 7DX, ENGLAND	0301-4797	1095-8630		J ENVIRON MANAGE	J. Environ. Manage.	DEC 1	2021	299
J	Rathnayake, D; Ehidiamhen, PO; Egene, CE; Stevens, CV; Meers, E; Masek, O; Ronsse, F				Rathnayake, Dilani; Ehidiamhen, Polycarp Onosedeba; Egene, Caleb Elijah; Stevens, Christian, V; Meers, Erik; Masek, Ondrej; Ronsse, Frederik			Investigation of biomass and agricultural plastic co-pyrolysis: Effect on biochar yield and properties	JOURNAL OF ANALYTICAL AND APPLIED PYROLYSIS			English	Article						Biochar; Agricultural plastic waste; Spent growing media; Mulching sheets; Plastic grow bags; Co-pyrolysis	WASTE; SOILS; EXTRACTION; RECOVERY	Complete separation of mixed plastic and biomass waste is a technically difficult, laborious, expensive and timeconsuming process. Hence, co-pyrolysis of these agricultural waste streams with low levels of plastic contamination presents a novel approach for the management of these plastic containing wastes, producing stable forms of carbon with potential use in environmental, agricultural and ind…	[Rathnayake, Dilani; Ehidiamhen, Polycarp Onosedeba; Ronsse, Frederik] Univ Ghent, Fac Biosci Engn, Dept Green Chem & Technol, Thermochem Convers Biomass Res Grp TCCB, Campus Coupure, B-9000 Ghent, Belgium; [Egene, Caleb Elijah; Meers, Erik] Univ Ghent, Fac Biosci Engn, Dept Green Chem & Technol, Lab Analyt Chem & Appl Ecochem EcoChem, Campus Coupure,653 Coupure Links, B-9000 Ghent, Belgium; [Ste…	Ghent University; Ghent University; Ghent University; University of Edinburgh	Ronsse, F (corresponding author), Univ Ghent, Fac Biosci Engn, Dept Green Chem & Technol, Thermochem Convers Biomass Res Grp, 653 Coupure Links, B-9000 Ghent, Belgium.	Frederik.Ronsse@UGent.be	Ronsse, Frederik/AAH-2857-2021; Mašek, Ondřej/D-6315-2018; Egene, Caleb/ABC-4098-2020; Stevens, Christian/X-2792-2019; Ronsse, Frederik/D-9691-2016; meers, Erik/A-2789-2016	Masek, Ondrej/0000-0003-0713-766X; Ronsse, Frederik/0000-0002-3290-9177; Ehidiamhen, Polycarp/0000-0002-5429-6025; meers, Erik/0000-0002-8296-3462	European Union Horizon 2020 Research and Innovative Training Network programme under the Marie SklodowskaCurie grant [721991]	European Union Horizon 2020 Research and Innovative Training Network programme under the Marie SklodowskaCurie grant	This study received financial support from the European Union Horizon 2020 Research and Innovative Training Network programme under the Marie SklodowskaCurie grant agreement No 721991.		48	60	64	5	91	ELSEVIER	AMSTERDAM	RADARWEG 29, 1043 NX AMSTERDAM, NETHERLANDS	0165-2370	1873-250X		J ANAL APPL PYROL	J. Anal. Appl. Pyrolysis	MAY	2021	155
J	Yin, FF; Zhuang, QX; Chang, TH; Zhang, C; Sun, HD; Sun, QK; Wang, CAS; Li, L				Yin, Fengfu; Zhuang, Qianxiao; Chang, Tianhao; Zhang, Chao; Sun, Huadong; Sun, Qikun; Wang, Chuansheng; Li, Lin			Study on pyrolysis characteristics and kinetics of mixed plastic waste	JOURNAL OF MATERIAL CYCLES AND WASTE MANAGEMENT			English	Article						Plastic wastes; Co-pyrolysis; Pyrolysis kinetics; Activation energy	CO-PYROLYSIS; THERMAL-DEGRADATION; BEHAVIOR; PVC; MIXTURES; BIOMASS; PP	Different types of plastic wastes have caused serious environmental problems. Co-pyrolysis and separation techniques are being widely used because of the complex components of plastic wastes. In this study, Thermogravimetric Analysis for mixed plastics with different compositions (Polypropylene/Polyvinyl chloride and Polypropylene/Polyvinyl chloride/Polystyrene mixtures) was carried out under thr…	[Yin, Fengfu; Zhuang, Qianxiao; Chang, Tianhao; Zhang, Chao; Sun, Huadong; Sun, Qikun; Wang, Chuansheng; Li, Lin] Qingdao Univ Sci & Technol, Coll Electromech Engn, Qingdao 266061, Peoples R China	Qingdao University of Science & Technology	Li, L (corresponding author), Qingdao Univ Sci & Technol, Coll Electromech Engn, Qingdao 266061, Peoples R China.	ll@qust.edu.cn	Chang, Tianhao/GYJ-2250-2022; sun, qikun/M-3327-2018	sun, qikun/0000-0002-9579-6050; Yin, Fengfu/0000-0003-4114-9541; Li, Lin/0000-0001-6626-5210	National Natural Science Foundation of China [51875297]	National Natural Science Foundation of China(National Natural Science Foundation of China (NSFC))	This research was funded by the National Natural Science Foundation of China (No. 51875297).		46	16	16	20	177	SPRINGER	NEW YORK	ONE NEW YORK PLAZA, SUITE 4600, NEW YORK, NY, UNITED STATES	1438-4957	1611-8227		J MATER CYCLES WASTE	J. Mater. Cycles Waste Manag.	SEP	2021	23	5
J	Ansah, E; Wang, LJ; Shahbazi, A				Ansah, Emmanuel; Wang, Lijun; Shahbazi, Abolghasem			Thermogravimetric and calorimetric characteristics during co-pyrolysis of municipal solid waste components	WASTE MANAGEMENT			English	Article						Pyrolysis; Torrefaction; Municipal solid waste; Waste to energy; Biomass; Plastics	BIOMASS; ENERGY; PRODUCTS; KINETICS; PLASTICS	The thermogravimetric and calorimetric characteristics during pyrolysis of wood, paper, textile and polyethylene terephthalate (PET) plastic in municipal solid wastes (MSW), and co-pyrolysis of biomass-derived and plastic components with and without torrefaction were investigated. The active pyrolysis of the PET plastic occurred at a much higher temperature range between 360 degrees C and 480 deg…	[Ansah, Emmanuel] North Carolina Agr & Tech State Univ, Dept Energy & Environm Syst, 1601 E Market St, Greensboro, NC 27411 USA; [Wang, Lijun; Shahbazi, Abolghasem] North Carolina Agr & Tech State Univ, Dept Nat Resources & Environm Design, 1601 E Market St, Greensboro, NC 27411 USA; [Wang, Lijun; Shahbazi, Abolghasem] North Carolina Agr & Tech State Univ, Dept Chem Biol & Bioengn, 1601 E Market …	University of North Carolina; North Carolina A&T State University; University of North Carolina; North Carolina A&T State University; University of North Carolina; North Carolina A&T State University	Wang, LJ (corresponding author), North Carolina Agr & Tech State Univ, Dept Nat Resources & Environm Design, 1601 E Market St, Greensboro, NC 27411 USA.	lwang@ncat.edu	Wang, Lijun/C-5788-2014	Ansah, Emmanuel/0000-0002-7181-1121	U.S. Department of Agriculture (USDA NIFA) [NC.X-294-5-15-130-1, 2013-38821-21141]; U.S National Scientific Foundation [HRD-1242152]; NIFA [2013-38821-21141, 577388] Funding Source: Federal RePORTER; Direct For Education and Human Resources; Division Of Human Resource Development [1242152] Funding Source: National Science Foundation	U.S. Department of Agriculture (USDA NIFA); U.S National Scientific Foundation; NIFA(United States Department of Agriculture (USDA)National Institute of Food & Agriculture); Direct For Education and Human Resources; Division Of Human Resource Development(National Science Foundation (NSF)NSF - Directorate for STEM Education (EDU))	A contribution of North Carolina Agricultural and Technical State University, supported by funds provided by U.S. Department of Agriculture (USDA NIFA awards: NC.X-294-5-15-130-1 and 2013-38821-21141) and U.S National Scientific Foundation (Grant #: HRD-1242152). Mention of a trade name, proprietary products, or company name is for presentation clarity and does not imply endorsement by the author…		28	74	78	10	118	PERGAMON-ELSEVIER SCIENCE LTD	OXFORD	THE BOULEVARD, LANGFORD LANE, KIDLINGTON, OXFORD OX5 1GB, ENGLAND	0956-053X	1879-2456		WASTE MANAGE	Waste Manage.	OCT	2016	56
J	Park, YK; Lee, B; Lee, HW; Watanabe, A; Jae, J; Tsang, YF; Kim, YM				Park, Young-Kwon; Lee, Boram; Lee, Hyung Won; Watanabe, Atsushi; Jae, Jungho; Tsang, Yiu Fai; Kim, Young-Min			Co-feeding effect of waste plastic films on the catalytic pyrolysis of Quercus variabilis over microporous HZSM-5 and HY catalysts	CHEMICAL ENGINEERING JOURNAL			English	Article						Catalytic co-pyrolysis; Quercus variabilis; Waste plastic films; HZSM-5; HY	HIGH-DENSITY POLYETHYLENE; BIO-OIL; BIOMASS; CELLULOSE; COPYROLYSIS; KINETICS; LIGNIN; POLYPROPYLENE; DISTILLATION; POLYSTYRENE	The co-pyrolysis of Quercus variabilis (Q. variabilis) and waste plastic films (PFs) was investigated to evaluate the co-feeding effect of waste PFs to the pyrolysis of Q. variabilis. Thermogravimetric analysis results revealed that the second TG (DTG) peak temperature of waste PFs was decreased from 479 degrees C to 470 degrees C by applying its co-pyrolysis with Q. variabilis, suggesting the ef…	[Park, Young-Kwon; Lee, Hyung Won] Univ Seoul, Sch Environm Engn, Seoul 02504, South Korea; [Lee, Boram] Hallym Univ, Dept Environm Sci & Biotechnol, Chunchon 24252, South Korea; [Watanabe, Atsushi] Frontier Labs Ltd, 4-16-20 Saikon, Koriyama, Fukushima 9648862, Japan; [Jae, Jungho] Pusan Natl Univ, Sch Chem & Biomol Engn, Busan 46241, South Korea; [Tsang, Yiu Fai] Educ Univ Hong Kong, Dept Sci &…	University of Seoul; Hallym University; Pusan National University; Education University of Hong Kong (EdUHK); Daegu University	Tsang, YF (corresponding author), Educ Univ Hong Kong, Dept Sci & Environm Studies, Tai Po, Hong Kong, Peoples R China.;Kim, YM (corresponding author), Daegu Univ, Dept Environm Engn, Gyongsan 38453, South Korea.	tsangyf@eduhk.hk; ymk@daegu.ac.kr	, Do Hyang Kim/J-6575-2012; Tsang, Yiu/AAJ-2524-2020	Jae, Jungho/0000-0001-6474-252X; Tsang, Yiu Fai/0000-0002-5872-6504; Kim, Young-Min/0000-0003-2639-3052	National Research Foundation of Korea (NRF) - Korea government (MSIT) [2018R1A2B2001121]	National Research Foundation of Korea (NRF) - Korea government (MSIT)	This work was supported by the National Research Foundation of Korea (NRF) grant funded by the Korea government (MSIT) (No. 2018R1A2B2001121).		46	45	47	1	112	ELSEVIER SCIENCE SA	LAUSANNE	PO BOX 564, 1001 LAUSANNE, SWITZERLAND	1385-8947	1873-3212		CHEM ENG J	Chem. Eng. J.	DEC 15	2019	378
J	Sophonrat, N; Sandström, L; Johansson, AC; Yang, WH				Sophonrat, Nanta; Sandstrom, Linda; Johansson, Ann-Christine; Yang, Weihong			Co-pyrolysis of Mixed Plastics and Cellulose: An Interaction Study by Py-GCXGC/MS	ENERGY & FUELS			English	Article							HIGH-DENSITY POLYETHYLENE; FLUIDIZED-BED REACTOR; BIO-OIL; WASTE PLASTICS; BIOMASS; POLYPROPYLENE; MIXTURES; PRODUCTS; MICROPYROLYZER; DECOMPOSITION	Understanding of the interaction between cellulose and various plastics is crucial for designing waste-to-energy processes. In this work, co-pyrolysis of polystyrene (PS) and cellulose was performed in a Py-GCXGC/MS system at 450-600 degrees C with ratios 70:30, 50:50, and 30:70. Polypropylene (PP), polyethylene (PE), and polyethylene terephthalate (PET) were then added to the mixture with differ…	[Sophonrat, Nanta; Yang, Weihong] KTH Royal Inst Technol, Dept Mat Sci & Engn, S-11428 Stockholm, Sweden; [Sandstrom, Linda; Johansson, Ann-Christine] RISE Energy Technol Ctr AB, Box 726, SE-94128 Pitea, Sweden	Royal Institute of Technology	Sophonrat, N (corresponding author), KTH Royal Inst Technol, Dept Mat Sci & Engn, S-11428 Stockholm, Sweden.	nanta@kth.se	Johansson, Ann-Christine/JKL-4516-2023; Yang, Weihong/AFN-1693-2022; Sophonrat, Nanta/AAT-4807-2020	Sandstrom, Linda/0000-0002-8264-4736; Sophonrat, Nanta/0000-0003-2962-3167; Yang, Weihong/0000-0002-1837-5439; Johansson, Ann-Christine/0000-0001-9126-0155	Swedish Energy Agency; DPST project from the Institute for the Promotion of Teaching Science and Technology (IPST), Thailand	Swedish Energy Agency(Swedish Energy Agency); DPST project from the Institute for the Promotion of Teaching Science and Technology (IPST), Thailand	The authors appreciate financial support from the Swedish Energy Agency. N.S. also appreciates the financial support from the DPST project from the Institute for the Promotion of Teaching Science and Technology (IPST), Thailand.		37	66	69	4	88	AMER CHEMICAL SOC	WASHINGTON	1155 16TH ST, NW, WASHINGTON, DC 20036 USA	0887-0624	1520-5029		ENERG FUEL	Energy Fuels	OCT	2017	31	10
J	Wang, LZ; Chai, MY; Liu, RH; Cai, JM				Wang, Linzheng; Chai, Meiyun; Liu, Ronghou; Cai, Junmeng			Synergetic effects during co-pyrolysis of biomass and waste tire: A study on product distribution and reaction kinetics	BIORESOURCE TECHNOLOGY			English	Article						Co-pyrolysis; Biomass; Waste tire; Synergetic effects	ACTIVATION-ENERGY MODEL; BIO-OIL PRODUCTION; PARAMETERS; BEHAVIORS; SOAPSTOCK; RESIDUES; PLASTICS; SAWDUST; BLENDS; STRAW	The synergetic effects during co-pyrolysis of biomass and waste fire (WT) were investigated concerning the product distribution and reaction kinetics. Two biomass feedstocks were separately mixed with WT at different effective hydrogen/carbon ratio (H/C-eff), and analytical co-pyrolysis of mixtures was conducted using pyrolysis gas chromatography/mass spectroscopy at 500 degrees C. Product distri…	[Wang, Linzheng; Chai, Meiyun; Liu, Ronghou; Cai, Junmeng] Shanghai Jiao Tong Univ, Sch Agr & Biol, Biomass Energy Engn Res Ctr, 800 Dongchuan Rd, Shanghai 200240, Peoples R China; [Wang, Linzheng; Chai, Meiyun; Liu, Ronghou; Cai, Junmeng] Minist Agr, Key Lab Urban Agr South, 800 Dongchuan Rd, Shanghai 200240, Peoples R China	Shanghai Jiao Tong University; Ministry of Agriculture & Rural Affairs	Liu, RH (corresponding author), Shanghai Jiao Tong Univ, Sch Agr & Biol, Biomass Energy Engn Res Ctr, 800 Dongchuan Rd, Shanghai 200240, Peoples R China.	liurhou@sjtu.edu.cn			National Natural Science Foundation of China [51776127]	National Natural Science Foundation of China(National Natural Science Foundation of China (NSFC))	Financial support from the National Natural Science Foundation of China (Grant No. 51776127) is greatly acknowledged. The authors also thank Wenjuan Yu for her assistance in experimental works.		34	71	77	4	114	ELSEVIER SCI LTD	OXFORD	THE BOULEVARD, LANGFORD LANE, KIDLINGTON, OXFORD OX5 1GB, OXON, ENGLAND	0960-8524	1873-2976		BIORESOURCE TECHNOL	Bioresour. Technol.	NOV	2018	268
J	Sajdak, M; Muzyka, R; Hrabak, J; Slowik, K				Sajdak, Marcin; Muzyka, Roksana; Hrabak, Joanna; Slowik, Krzysztof			Use of plastic waste as a fuel in the co-pyrolysis of biomass Part III: Optimisation of the co-pyrolysis process	JOURNAL OF ANALYTICAL AND APPLIED PYROLYSIS			English	Article						Biochar; Biomass; Solid fuels properties; Plastics waste; DOE		In this research, the synergistic relationship between the addition of polypropylene and the biomass in the thermal conversion process was studied. Additions of polypropylene in co-pyrolysis process can effect to the degassing of bio-char and may also affect the performance of the yields of liquid and gaseous products that were obtained in the thermal conversion process. The main goal of this res…	[Sajdak, Marcin; Muzyka, Roksana; Hrabak, Joanna; Slowik, Krzysztof] Inst Chem Proc Coal, PL-41803 Zabrze, Poland	Institute for Chemical Processing of Coal	Sajdak, M (corresponding author), Inst Chem Proc Coal, 1 Zamkowa St, PL-41803 Zabrze, Poland.	msajdak@ichpw.pl	Sajdak, Marcin/LLK-6607-2024; Sajdak, Marcin/C-9554-2019	Hrabak, Joanna/0000-0001-5548-0003; Sajdak, Marcin/0000-0001-6037-7748; Muzyka, Roksana/0000-0002-6722-9710	NCBiR [4]	NCBiR	These studies were co-funded under the budget of research task No. 4, Development of integrated technology of fuels and energy from biomass, agricultural waste, and others as part of the strategic program of research and development: Advanced technology of obtaining energy provided by NCBiR.		15	42	44	4	61	ELSEVIER SCIENCE BV	AMSTERDAM	PO BOX 211, 1000 AE AMSTERDAM, NETHERLANDS	0165-2370	1873-250X		J ANAL APPL PYROL	J. Anal. Appl. Pyrolysis	MAR	2015	112
J	Lu, P; Huang, QX; Bourtsalas, AC; Chi, Y; Yan, JH				Lu, Peng; Huang, Qunxing; Bourtsalas, A. C. (Thanos); Chi, Yong; Yan, Jianhua			Synergistic effects on char and oil produced by the co-pyrolysis of pine wood, polyethylene and polyvinyl chloride	FUEL			English	Article						Biomass; Plastic; Co-pyrolysis; Char; Oil	HIGH-DENSITY POLYETHYLENE; THERMOGRAVIMETRIC ANALYSIS; PLASTIC WASTE; CATALYTIC PYROLYSIS; BIOMASS BLENDS; GASIFICATION; PVC; MECHANISM; CELLULOSE; MIXTURES	The synergistic effects of the woody biomass (pine wood (PW)) and plastics (polyethylene (PE) and polyvinyl chloride (PVC)) during co-pyrolysis on the properties of char and oil were examined by thermogravimetric analysis (TGA) and fixed bed reactor. The results showed that PW-PE interaction increased the maximum weight loss rate of PW by 8.0-23.7%. Co-pyrolysis of PW-PE blends produced lower qua…	[Lu, Peng; Huang, Qunxing; Chi, Yong; Yan, Jianhua] Zhejiang Univ, State Key Lab Clean Energy Utilizat, Hangzhou 310027, Zhejiang, Peoples R China; [Bourtsalas, A. C. (Thanos)] Columbia Univ, Earth Engn Ctr, New York, NY 10027 USA	Zhejiang University; Columbia University	Huang, QX (corresponding author), Zhejiang Univ, Inst Thermal Power Engn, 38 Zheda Rd, Hangzhou 310027, Zhejiang, Peoples R China.	hqx@zju.edu.cn		Yan, Jianhua/0009-0001-8162-7897; Yan, Jianhua/0009-0008-9419-5107	National Natural Science Foundation of China [51621005]; National Key Research and Development Program of China [2016YFE0202000]; Environmental Protection Special Funds for Public Welfare [201509013]; Fundamental Research Funds for the Central Universities [2017FZA4013]; Academic Raising Star Training Program for PhD Student of Zhejiang University	National Natural Science Foundation of China(National Natural Science Foundation of China (NSFC)); National Key Research and Development Program of China(National Key Research & Development Program of China); Environmental Protection Special Funds for Public Welfare; Fundamental Research Funds for the Central Universities(Fundamental Research Funds for the Central Universities); Academic Raising …	This work was supported by the National Natural Science Foundation of China (Grant No. 51621005), the National Key Research and Development Program of China (2016YFE0202000), the Environmental Protection Special Funds for Public Welfare (201509013), the Fundamental Research Funds for the Central Universities (2017FZA4013) and the Academic Raising Star Training Program for PhD Student of Zhejiang …		44	138	149	7	220	ELSEVIER SCI LTD	OXFORD	THE BOULEVARD, LANGFORD LANE, KIDLINGTON, OXFORD OX5 1GB, OXON, ENGLAND	0016-2361	1873-7153		FUEL	Fuel	OCT 15	2018	230
J	Mishra, REEKMR; Iyer, AERRHR; Mohanty, KTH				Mishra, Ranjeet Kumar; Iyer, Jayendran Shridharan; Mohanty, Kaustubha			Conversion of waste biomass and waste nitrile gloves into renewable fuel	WASTE MANAGEMENT			English	Article						Biomass; Co-pyrolysis; Fuel properties; Synergistic effect; Waste nitrile gloves	HIGH-DENSITY POLYETHYLENE; CO-PYROLYSIS; THERMAL-BEHAVIOR; PLASTIC WASTE; KINETICS; SEEDS; POLYSTYRENE; GASOLINE; HYDROGEN; BLENDS	The present study deals co-pyrolysis of neem seeds (NM) and waste nitrile gloves (WNG) in a semi-batch reactor with and without catalysts. Results confirmed that the yield of pyrolytic liquid was higher (43.52 wt% at NM: WNG ratio of 3:1) during thermal co-pyrolysis compared to that of catalytic co-pyrolysis (40.42 wt% and 37.14 wt% respectively with CaO and Al2O3 as catalysts). The use of cataly…	[Mishra, Ranjeet Kumar; Iyer, Jayendran Shridharan; Mohanty, Kaustubha] Indian Inst Technol Guwahati, Dept Chem Engn, Gauhati 781039, India	Indian Institute of Technology System (IIT System); Indian Institute of Technology (IIT) - Guwahati	Mohanty, KTH (corresponding author), Indian Inst Technol Guwahati, Dept Chem Engn, Gauhati 781039, India.	kmohanty@iitg.ac.in	MISHRA, RANJEET/AAQ-9451-2020; Mohanty, Kaustubha/AAU-2510-2021	MISHRA, Dr. RANJEET KUMAR/0000-0002-6138-8729; Mohanty, Kaustubha/0000-0001-9810-9562					41	46	47	2	28	PERGAMON-ELSEVIER SCIENCE LTD	OXFORD	THE BOULEVARD, LANGFORD LANE, KIDLINGTON, OXFORD OX5 1GB, ENGLAND	0956-053X			WASTE MANAGE	Waste Manage.	APR 15	2019	89
J	Pinto, F; Miranda, M; Costa, P				Pinto, Filomena; Miranda, Miguel; Costa, Paula			Production of liquid hydrocarbons from rice crop wastes mixtures by co-pyrolysis and co-hydropyrolysis	FUEL			English	Article						Co-pyrolysis; Co-hydropyrolysis; Rice husk and straw; PE; PP; PS	BIO-OIL PRODUCTION; POLYSTYRENE PYROLYSIS; CATALYTIC PYROLYSIS; HUSK PYROLYSIS; POLYETHYLENE; BIOMASS; HYDROGEN; DEGRADATION; REACTOR; YIELDS	The aim of this work was the valorisation of rice crop wastes mixtures by pyrolysis to produce liquids to be used as bio-fuels or as raw bio-materials. The effect of waste mixtures composition on liquids yield and composition was studied. Rice husk (RH) and straw (RS) were pyrolysed with polyethylene (PE), the main plastic used in rice production process. Polypropylene (PP) and polystyrene (PS) w…	[Pinto, Filomena; Miranda, Miguel; Costa, Paula] LNEG, Estr Paco do Lumiar 22, P-1649038 Lisbon, Portugal	Laboratorio Nacional de Energia e Geologia IP (LNEG)	Pinto, F (corresponding author), LNEG, Estr Paco do Lumiar 22, P-1649038 Lisbon, Portugal.	filomena.pinto@lneg.pt	Miranda, Miguel/D-9167-2013; Costa, Paula/P-6395-2015	Miranda, Miguel/0000-0001-9318-1506; Costa, Paula/0000-0003-2024-4267	FEDER through the Operational Program for Competitive Factors of COMPETE; National Funds through FCT - Foundation for Science and Technology [PTDC/AAG - REC/3477/2012, FCOMP-01-0124-FEDER-027827]; FCT/MTCES; QREN; COMPETE; FEDER; Fundação para a Ciência e a Tecnologia [PTDC/AAG-REC/3477/2012] Funding Source: FCT	FEDER through the Operational Program for Competitive Factors of COMPETE; National Funds through FCT - Foundation for Science and Technology(Fundacao para a Ciencia e a Tecnologia (FCT)); FCT/MTCES(Fundacao para a Ciencia e a Tecnologia (FCT)); QREN; COMPETE; FEDER(European Union (EU)Spanish Government); Fundação para a Ciência e a Tecnologia(Fundacao para a Ciencia e a Tecnologia (FCT))	This research was financed by FEDER through the Operational Program for Competitive Factors of COMPETE and by National Funds through FCT - Foundation for Science and Technology by supporting the project PTDC/AAG - REC/3477/2012 - RICEVALOR - Energetic valorisation of wastes obtained during rice production in Portugal, FCOMP-01-0124-FEDER-027827, a project sponsored by FCT/MTCES, QREN, COMPETE and…		50	49	54	3	155	ELSEVIER SCI LTD	OXFORD	THE BOULEVARD, LANGFORD LANE, KIDLINGTON, OXFORD OX5 1GB, OXON, ENGLAND	0016-2361	1873-7153		FUEL	Fuel	JUN 15	2016	174
J	Suriapparao, DV; Kumar, TH; Reddy, BR; Yerrayya, A; Srinivas, BA; Sivakumar, P; Prakash, SR; Rao, CS; Sridevi, V; Desinghu, J				Suriapparao, Dadi, V; Kumar, Tanneru Hemanth; Reddy, B. Rajasekhar; Yerrayya, Attada; Srinivas, B. Abhinaya; Sivakumar, Pandian; Prakash, S. Reddy; Rao, Chinta Sankar; Sridevi, Veluru; Desinghu, J.			Role of ZSM5 catalyst and char susceptor on the synthesis of chemicals and hydrocarbons from microwave-assisted in-situ catalytic co-pyrolysis of algae and plastic wastes	RENEWABLE ENERGY			English	Article						Algae; Plastics; Microwave; Catalyst; Hydrocarbons	BIO-OIL PRODUCTION; MICROALGAE; PRODUCTS; BIOMASS; MACROALGAE; TEMPERATURE; FUEL; ABSORBENT; MECHANISM; KINETICS	The synergetic effect between algae biomass in co-pyrolysis with synthetic plastics (polypropylene (PP), polyethylene (PE), and expanded polystyrene (EPS)) was investigated in this work. Individual feedstock pyrolysis and co-pyrolysis of algae with PP, PE, and EPS were conducted at a constant supply of microwave energy (420 J/s). Pyrolysis char was used as a susceptor in all the experiments. The …	[Suriapparao, Dadi, V; Reddy, B. Rajasekhar] Pandit Deendayal Energy Univ, Dept Chem Engn, Gandhinagar 382007, Gujarat, India; [Kumar, Tanneru Hemanth] Indian Inst Petr & Energy Visakhapatnam, Dept Chem Engn, Visakhapatnam 530003, Andhra Pradesh, India; [Reddy, B. Rajasekhar] Univ Delaware, Delaware Energy Inst, Newark, DE 19711 USA; [Yerrayya, Attada] King Abdullah Univ Sci & Technol, KAUST Cata…	Pandit Deendayal Energy University; University of Delaware; King Abdullah University of Science & Technology; Pandit Deendayal Energy University; Pandit Deendayal Energy University; National Institute of Technology (NIT System); National Institute of Technology Karnataka; Andhra University; Indian Institute of Technology System (IIT System); Indian Institute of Technology (IIT) - Madras	Suriapparao, DV (corresponding author), Pandit Deendayal Energy Univ, Dept Chem Engn, Gandhinagar 382007, Gujarat, India.	suryadadi165@gmail.com	Sankar Rao, Chinta/AAI-3081-2020; Tanneru, Hemanth Kumar/AAW-3277-2021; YERRAYYA, ATTADA/AAC-2900-2021; Tanneru, Hemanth Kumar/F-5624-2012; Pandian, Sivakumar/B-9367-2013; BUSIGARI, RAJASEKHAR REDDY/E-9657-2015; , BHASURU ABHINAYA SRINIVAS/Y-7489-2019	Tanneru, Hemanth Kumar/0000-0002-3385-7030; Pandian, Sivakumar/0000-0002-4469-4126; BUSIGARI, RAJASEKHAR REDDY/0000-0003-2711-6823; , BHASURU ABHINAYA SRINIVAS/0000-0002-2848-3046; Sankar Rao, Chinta/0000-0002-3554-5006					66	38	38	23	191	PERGAMON-ELSEVIER SCIENCE LTD	OXFORD	THE BOULEVARD, LANGFORD LANE, KIDLINGTON, OXFORD OX5 1GB, ENGLAND	0960-1481	1879-0682		RENEW ENERG	Renew. Energy	JAN	2022	181
J	Tang, YJ; Huang, QX; Sun, K; Chi, Y; Yan, JH				Tang, Yijing; Huang, Qunxing; Sun, Kai; Chi, Yong; Yan, Jianhua			Co-pyrolysis characteristics and kinetic analysis of organic food waste and plastic	BIORESOURCE TECHNOLOGY			English	Article						Co-pyrolysis; Thermogravimetric analysis; Kinetic; Tar	NITROGEN TRANSFORMATION; PVC; BIOMASS; MICROALGAE; GASIFICATION; FERMENTATION; CELLULOSE; BEHAVIOR; FURNACE; MODEL	In this work, typical organic food waste (soybean protein (SP)) and typical chlorine enriched plastic waste (polyvinyl chloride (PVC)) were chosen as principal MSW components and their interaction during co-pyrolysis was investigated. Results indicate that the interaction accelerated the reaction during co-pyrolysis. The activation energies needed were 2-13% lower for the decomposition of mixture…	[Tang, Yijing; Huang, Qunxing; Sun, Kai; Chi, Yong; Yan, Jianhua] Zhejiang Univ, State Key Lab Clean Energy Utilizat, Hangzhou 310027, Zhejiang, Peoples R China	Zhejiang University	Huang, QX (corresponding author), Zhejiang Univ, State Key Lab Clean Energy Utilizat, Hangzhou 310027, Zhejiang, Peoples R China.	hqx@zju.edu.cn		Yan, Jianhua/0009-0008-9419-5107	National Natural Science Foundation of China [51621005]; Environment Protection Special Funds for Public Welfare [201509013]	National Natural Science Foundation of China(National Natural Science Foundation of China (NSFC)); Environment Protection Special Funds for Public Welfare	Acknowledgment is gratefully extended to National Natural Science Foundation of China (Grant No. 51621005) and the Environment Protection Special Funds for Public Welfare (201509013) for their financial support.		42	138	146	13	234	ELSEVIER SCI LTD	OXFORD	THE BOULEVARD, LANGFORD LANE, KIDLINGTON, OXFORD OX5 1GB, OXON, ENGLAND	0960-8524	1873-2976		BIORESOURCE TECHNOL	Bioresour. Technol.	FEB	2018	249
J	Su, GC; Ong, HC; Gan, YY; Chen, WH; Chong, CT; Ok, YS				Su, Guangcan; Ong, Hwai Chyuan; Gan, Yong Yang; Chen, Wei-Hsin; Chong, Cheng Tung; Ok, Yong Sik			Co-pyrolysis of microalgae and other biomass wastes for the production of high-quality bio-oil: Progress and prospective	BIORESOURCE TECHNOLOGY			English	Review						Microalgae; Biofuels; Co-pyrolysis; Catalytic effect; Environmental sustainability	CATALYTIC FAST PYROLYSIS; CHLORELLA-VULGARIS; BIOFUEL PRODUCTION; LIGNOCELLULOSIC BIOMASS; LIPID EXTRACTION; TG-FTIR; TECHNOECONOMIC ASSESSMENT; AROMATIC-HYDROCARBONS; SURFACE-MORPHOLOGY; RENEWABLE ENERGY	Microalgae are the most prospective raw materials for the production of biofuels, pyrolysis is an effective method to convert biomass into bioenergy. However, biofuels derived from the pyrolysis of microalgae exhibit poor fuel properties due to high content of moisture and protein. Co-pyrolysis is a simple and efficient method to produce high-quality bio-oil from two or more materials. Tires, pla…	[Su, Guangcan; Gan, Yong Yang] Univ Malaya, Dept Mech Engn, Fac Engn, Kuala Lumpur 50603, Malaysia; [Ong, Hwai Chyuan] Univ Technol Sydney, Ctr Green Technol, Fac Engn & IT, Sydney, NSW 2007, Australia; [Ong, Hwai Chyuan] Natl Yunlin Univ Sci & Technol, Future Technol Res Ctr, 123 Univ Rd,Sect 3, Touliu 64002, Yunlin, Taiwan; [Chen, Wei-Hsin] Natl Cheng Kung Univ, Dept Aeronaut & Astronaut, Taina…	Universiti Malaya; University of Technology Sydney; National Yunlin University Science & Technology; National Cheng Kung University; Shanghai Jiao Tong University; Korea University; Korea University	Ong, HC (corresponding author), Univ Technol Sydney, Ctr Green Technol, Fac Engn & IT, Sydney, NSW 2007, Australia.;Ong, HC (corresponding author), Natl Yunlin Univ Sci & Technol, Future Technol Res Ctr, 123 Univ Rd,Sect 3, Touliu 64002, Yunlin, Taiwan.	ong1983@yahoo.com	Chen, Wei-Hsin/S-2033-2018; Chong, Cheng/Y-8056-2019; Gan, Yong/J-6405-2016; Ong, Hwai Chyuan/A-9492-2013; tao, sun/AAA-4645-2020						128	66	67	14	190	ELSEVIER SCI LTD	London	125 London Wall, London, ENGLAND	0960-8524	1873-2976		BIORESOURCE TECHNOL	Bioresour. Technol.	JAN	2022	344		B
J	Wang, J; Zhang, B; Zhong, ZP; Ding, K; Xie, QL; Ruan, R				Wang, Jia; Zhang, Bo; Zhong, Zhaoping; Ding, Kuan; Xie, Qinglong; Ruan, Roger			Catalytic fast co-pyrolysis of mushroom waste and waste oil to promote the formation of aromatics	CLEAN TECHNOLOGIES AND ENVIRONMENTAL POLICY			English	Article						Catalytic fast co-pyrolysis; Mushroom waste; Waste oil; Hydrocarbons; Synergistic effect	DIFFERENT PLASTICS; PALM SHELL; HIGH-GRADE; BIOMASS; POLYSTYRENE; MIXTURES; PRODUCE; HYDROCARBONS; POLYETHYLENE	Catalytic fast pyrolysis is one of the most promising and prevailing technologies for the improvement of bio-oil quality. In this contribution, catalytic fast co-pyrolysis of mushroom waste and waste oil over HZSM-5 zeolite catalyst was conducted to promote the production of aromatics using pyrolysis-gas chromatography/mass spectrometry. The effects of pyrolysis temperature and waste oil to mushr…	[Wang, Jia; Zhang, Bo; Zhong, Zhaoping; Ding, Kuan] Southeast Univ, Key Lab Energy Thermal Convers & Control, Minist Educ, Nanjing 210096, Jiangsu, Peoples R China; [Wang, Jia; Zhang, Bo; Zhong, Zhaoping; Ding, Kuan] Southeast Univ, Sch Energy & Environm, Nanjing 210096, Jiangsu, Peoples R China; [Zhang, Bo; Xie, Qinglong; Ruan, Roger] Univ Minnesota, Ctr Biorefining, 1390 Eckles Ave, St Paul, MN…	Southeast University - China; Southeast University - China; University of Minnesota System; University of Minnesota Twin Cities; University of Minnesota System; University of Minnesota Twin Cities	Zhang, B; Zhong, ZP (corresponding author), Southeast Univ, Key Lab Energy Thermal Convers & Control, Minist Educ, Nanjing 210096, Jiangsu, Peoples R China.;Zhang, B; Zhong, ZP (corresponding author), Southeast Univ, Sch Energy & Environm, Nanjing 210096, Jiangsu, Peoples R China.;Zhang, B (corresponding author), Univ Minnesota, Ctr Biorefining, 1390 Eckles Ave, St Paul, MN 55108 USA.;Zhang, B (c…	wangjia_seu@163.com; zhangbo8848@yeah.net; zzhong@seu.edu.cn	Ding, Kuan/N-6722-2019; Ruan, Roger/ABE-4317-2021; Zhang, Bo/IZQ-3837-2023	Ding, Kuan/0000-0001-6743-7344; Ruan, Roger/0000-0001-8835-2649	National Natural Science Fund Program of China [51276040, U1361115]; National Key Basic Research Program of China (973 Program) [2013CB228106]; Scientific Research Foundation of Graduate School of Southeast University [YBJJ1430]; Fundamental Research Funds for the Central Universities; scientific innovation research program of college graduate in Jiangsu province [KYLX_0183]; China Scholarship Co…	National Natural Science Fund Program of China(National Natural Science Foundation of China (NSFC)); National Key Basic Research Program of China (973 Program)(National Basic Research Program of China); Scientific Research Foundation of Graduate School of Southeast University; Fundamental Research Funds for the Central Universities(Fundamental Research Funds for the Central Universities); scienti…	The authors are grateful for the financial support from the National Natural Science Fund Program of China (Nos. 51276040 and U1361115), the National Key Basic Research Program of China (973 Program) (No. 2013CB228106), the Scientific Research Foundation of Graduate School of Southeast University (No. YBJJ1430), the Fundamental Research Funds for the Central Universities, the scientific innovatio…		25	13	15	0	84	SPRINGER	NEW YORK	ONE NEW YORK PLAZA, SUITE 4600, NEW YORK, NY, UNITED STATES	1618-954X	1618-9558		CLEAN TECHNOL ENVIR	Clean Technol. Environ. Policy	DEC	2016	18	8
J	Xu, D; Zhang, ZH; He, ZJ; Wang, SR				Xu, Dan; Zhang, Zihang; He, Zijian; Wang, Shurong			Machine learning-driven prediction and optimization of monoaromatic oil production from catalytic co-pyrolysis of biomass and plastic wastes	FUEL			English	Article						Biomass; Plastic wastes; Catalytic co-pyrolysis; Prediction; Machine learning	WOOD; POLYETHYLENE; BEHAVIOR; SAWDUST; YIELD	Catalytic co-pyrolysis of biomass and plastic wastes is an efficient way for monoaromatic-rich oil production, while it is difficult to conclude oil evolution rule due to the complex interaction of multiple factors during copyrolysis. Hence, multiple machine learning algorithms were devised to aid process optimization and zeolite catalyst screening. The results showed that gradient boosting decis…	[Xu, Dan; Zhang, Zihang; He, Zijian; Wang, Shurong] Zhejiang Univ, State Key Lab Clean Energy Utilizat, Hangzhou 310027, Peoples R China	Zhejiang University	Wang, SR (corresponding author), Zhejiang Univ, State Key Lab Clean Energy Utilizat, Hangzhou 310027, Peoples R China.	srwang@zju.edu.cn	Xu, Dan/KPA-7396-2024		Key R amp; D Program of Zhejiang [2022C03092]; National Science Fund for Distin- guished Young Scholars [51725603]; Zhejiang Provincial Natural Sci- ence Foundation of China [LY23E060005]; Postdoctoral Research Foundation of China [2022TQ0270]	Key R amp; D Program of Zhejiang; National Science Fund for Distin- guished Young Scholars(National Natural Science Foundation of China (NSFC)National Science Fund for Distinguished Young Scholars); Zhejiang Provincial Natural Sci- ence Foundation of China(Natural Science Foundation of Zhejiang Province); Postdoctoral Research Foundation of China(China Postdoctoral Science Foundation)	The authors are grateful for financial supports provided by Key R & D Program of Zhejiang (2022C03092) , National Science Fund for Distin- guished Young Scholars (51725603) , Zhejiang Provincial Natural Sci- ence Foundation of China (LY23E060005) and Postdoctoral Research Foundation of China (2022TQ0270) .		46	17	19	21	91	ELSEVIER SCI LTD	London	125 London Wall, London, ENGLAND	0016-2361	1873-7153		FUEL	Fuel	OCT 15	2023	350
J	Jin, ZC; Yin, LJ; Chen, DZ; Jia, YJ; Yuan, J; Hu, YY				Jin, Zechen; Yin, Lijie; Chen, Dezhen; Jia, Yuanjie; Yuan, Jun; Hu, Yuyan			Co-pyrolysis characteristics of typical components of waste plastics in a falling film pyrolysis reactor	CHINESE JOURNAL OF CHEMICAL ENGINEERING			English	Article						Co-pyrolysis; Falling film reactor; Waste plastics	LOW-DENSITY POLYETHYLENE; POLYPROPYLENE; POLYSTYRENE; MIXTURES; KINETICS; DEGRADATION; PRODUCTS; YIELD; FUEL	Waste plastics mainly come from MSW and usually exist in the form of mixed plastics. During the co-pyrolysis process of mixed plastics, various plastic components have different physicochemical properties and reaction mechanisms. Considering the high viscosity and low thermal conductivity of molten plastics, a falling film pyrolysis reactor was selected to explore the rapid co-pyrolysis process o…	[Jin, Zechen; Yin, Lijie; Chen, Dezhen; Jia, Yuanjie; Yuan, Jun; Hu, Yuyan] Tongji Univ, Thermal & Environm Engn Inst, Shanghai 200092, Peoples R China; [Jin, Zechen] Shanghai Municipal Engn Design Inst Grp Co Ltd, Shanghai 200092, Peoples R China	Tongji University	Yin, LJ (corresponding author), Tongji Univ, Thermal & Environm Engn Inst, Shanghai 200092, Peoples R China.	y_lijie@tongji.edu.cn			National Natural Science Foundation of China [51503154, 51776141]; Major Projects of China Water Pollution Control and Treatment Science and Technology [2017ZX07202005]	National Natural Science Foundation of China(National Natural Science Foundation of China (NSFC)); Major Projects of China Water Pollution Control and Treatment Science and Technology	Supported by the National Natural Science Foundation of China (51503154, 51776141), Major Projects of China Water Pollution Control and Treatment Science and Technology (2017ZX07202005).		25	24	29	14	192	CHEMICAL INDUSTRY PRESS	BEIJING	NO. 3 HUIXINLI CHAOYANGQU, BEIJING 100029, PEOPLES R CHINA	1004-9541	2210-321X		CHINESE J CHEM ENG	Chin. J. Chem. Eng.	OCT	2018	26	10
J	Luo, GQ; Wang, WM; Zhao, Y; Tao, X				Luo, Guanqun; Wang, Weimin; Zhao, Yuan; Tao, Xuan			Co-pyrolysis of pinewood and HDPE: pyrolysis characteristics and kinetic behaviors study	INTERNATIONAL JOURNAL OF LOW-CARBON TECHNOLOGIES			English	Article						biomass; HDPE; co-pyrolysis; synergistic effects; kinetics	PLASTIC WASTE; BIOMASS; OIL; COMPONENTS; RESIDUE	Co-pyrolysis of lignocellulosic biomass and hydrogen-rich petroleum-based polyolefin plastics is a promising to way to improve bio-oil quality and alleviate the waste plastic pollution issues. In this study, co-pyrolysis of pinewood and HDPE was systematically investigated. The addition of HDPE decreased yield of char and gas while increased that of bio-oil, enhancing the selectivity to alcohols …	[Luo, Guanqun; Tao, Xuan] Hangzhou City Univ, Cryogen Ctr, Huzhou St 51, Hangzhou 310015, Peoples R China; [Luo, Guanqun; Wang, Weimin] Zhejiang Univ Sci & Technol, Dept Energy & Environm Syst Engn, Liuhe Rd 318, Hangzhou 310023, Peoples R China; [Zhao, Yuan] Powerchina HuaDong Engn Corp Ltd, Gaojiao Rd 201, Hangzhou 311122, Peoples R China	Hangzhou City University; Zhejiang University of Science & Technology; POWERCHINA Huadong Engineering Corporation Limited	Luo, GQ (corresponding author), Hangzhou City Univ, Cryogen Ctr, Huzhou St 51, Hangzhou 310015, Peoples R China.;Luo, GQ (corresponding author), Zhejiang Univ Sci & Technol, Dept Energy & Environm Syst Engn, Liuhe Rd 318, Hangzhou 310023, Peoples R China.	luogq@hzcu.edu.cn; wwm1435104980@163.com; zhao_y20@hdec.com; taox@hzcu.edu.cn			Zhejiang Provincial Natural Science Foundation, China [52006196]; National Natural Science Foundation of China [LTGS23E060001]; Zhejiang Provincial Natural Science Foundation, China	Zhejiang Provincial Natural Science Foundation, China(Natural Science Foundation of Zhejiang Province); National Natural Science Foundation of China(National Natural Science Foundation of China (NSFC)); Zhejiang Provincial Natural Science Foundation, China(Natural Science Foundation of Zhejiang Province)	This work was supported by the National Natural Science Foundation of China (grant 52006196), and the Zhejiang Provincial Natural Science Foundation, China (grant LTGS23E060001).		48	0	0	10	28	OXFORD UNIV PRESS	OXFORD	GREAT CLARENDON ST, OXFORD OX2 6DP, ENGLAND	1748-1317	1748-1325		INT J LOW-CARBON TEC	Int. J. Low-Carbon Technol.	FEB 4	2023	18
J	Breyer, S; Mekhitarian, L; Rimez, B; Haut, B				Breyer, Sacha; Mekhitarian, Loucine; Rimez, Bart; Haut, Benoit			Production of an alternative fuel by the co-pyrolysis of landfill recovered plastic wastes and used lubrication oils	WASTE MANAGEMENT			English	Article						Co-pyrolysis; Plastic wastes; Used lubrication oil; Alternative fuel production; Landfill mining; Hi-Res TGA	THERMOGRAVIMETRIC ANALYSIS; BIOMASS BLENDS; POLYPROPYLENE; KINETICS; SHALE	This work is a preliminary study for the development of a co-pyrolysis process of plastic wastes excavated from a landfill and used lubrication oils, with the aim to produce an alternative liquid fuel for industrial use. First, thermogravimetric experiments were carried out with pure plastics (HDPE, LDPE, PP and PS) and oils (a motor oil and a mixture of used lubrication oils) in order to highlig…	[Breyer, Sacha; Mekhitarian, Loucine; Rimez, Bart; Haut, Benoit] ULB, Chem Engn Unit, Transfers Interfaces & Proc TIPs, Ave FD Roosevelt 50 CP 165-67, B-1050 Brussels, Belgium	Universite Libre de Bruxelles	Haut, B (corresponding author), ULB, Chem Engn Unit, Transfers Interfaces & Proc TIPs, Ave FD Roosevelt 50 CP 165-67, B-1050 Brussels, Belgium.	sbreyer@ulb.ac.be; bhaut@ulb.ac.be		Rimez, Bart/0000-0001-8122-1857; Haut, Benoit/0000-0002-3021-0207	Holcim group as well as the MINERVE project; Greenwin	Holcim group as well as the MINERVE project; Greenwin	The authors would like to acknowledge the financial and scientific support of the study by the Holcim group as well as the MINERVE project, funded by Greenwin. The authors are graceful to the FYSC lab (Physical Chemistry and Polymer Science) at the VUB for providing the TGA Q5000IR and scientific knowledge.		37	47	55	0	61	PERGAMON-ELSEVIER SCIENCE LTD	OXFORD	THE BOULEVARD, LANGFORD LANE, KIDLINGTON, OXFORD OX5 1GB, ENGLAND	0956-053X			WASTE MANAGE	Waste Manage.	FEB	2017	60
J	Xue, XF; Mi, J; Huang, FF; Wang, JY; Chen, LX; Liang, J				Xue, Xiangfei; Mi, Jin; Huang, Fanfan; Wang, Jingyue; Chen, Lanxin; Liang, Jie			Aromatics production from segmented co-pyrolysis of poplar sawdust and high-density polyethylene: Enhancing the synergistic effects	JOURNAL OF ANALYTICAL AND APPLIED PYROLYSIS			English	Article						Catalytic co-pyrolysis; Synergistic effect; Biomass; HDPE; Monocyclic aromatic hydrocarbons; Bio-oil	BIOMASS; CELLULOSE; LIGNIN; BEHAVIOR; HEMICELLULOSE; POLLUTION; OLEFINS; MGCL2	Catalytic co-pyrolysis of biomass and plastic waste is a promising approach for producing renewable biofuels and value-added chemicals. However, because of their different pyrolysis behaviors, the synergy between biomass and plastic is limited, and low-yield aromatics are produced. Herein, a modified segmented catalytic co-pyrolysis technology was proposed, and the effects of pyrolysis parameters…	[Xue, Xiangfei; Mi, Jin; Huang, Fanfan; Chen, Lanxin; Liang, Jie] Beihang Univ, Sch Energy & Power Engn, Beijing 102206, Peoples R China; [Xue, Xiangfei; Wang, Jingyue] Beihang Univ, Sch Space & Environm Sci, Beijing 102206, Peoples R China	Beihang University; Beihang University	Liang, J (corresponding author), Beihang Univ, Sch Energy & Power Engn, Beijing 102206, Peoples R China.	jieliang@buaa.edu.cn	LIANG, JIE/ADL-9886-2022	mi, jin/0009-0006-1312-7045	Beijing Natural Science Foundation [8222064]; National Natural Science Foundation of China [21906005, 22176009]; PetroChina Innovation Foundation; National Undergraduate Innovation and Entrepreneurship Project of Beihang University [202110006277]	Beijing Natural Science Foundation(Beijing Natural Science Foundation); National Natural Science Foundation of China(National Natural Science Foundation of China (NSFC)); PetroChina Innovation Foundation; National Undergraduate Innovation and Entrepreneurship Project of Beihang University	This work was supported by Beijing Natural Science Foundation (8222064) ; the National Natural Science Foundation of China (21906005, 22176009) ; and PetroChina Innovation Foundation. Jin- gyue Wang also thanks the financial support of National Undergraduate Innovation and Entrepreneurship Project of Beihang University (202110006277) .		46	9	10	10	64	ELSEVIER	AMSTERDAM	RADARWEG 29, 1043 NX AMSTERDAM, NETHERLANDS	0165-2370	1873-250X		J ANAL APPL PYROL	J. Anal. Appl. Pyrolysis	MAR	2023	170
J	Vibhakar, C; Sabeenian, RS; Kaliappan, S; Patil, PY; Patil, PP; Madhu, P; Dhanalakshmi, CS; Birhanu, HA				Vibhakar, Chirag; Sabeenian, R. S.; Kaliappan, S.; Patil, Pandurang Y.; Patil, Pravin P.; Madhu, P.; Sowmya Dhanalakshmi, C.; Ababu Birhanu, Habtewolde			Production and Optimization of Energy Rich Biofuel through Co-Pyrolysis by Utilizing Mixed Agricultural Residues and Mixed Waste Plastics	ADVANCES IN MATERIALS SCIENCE AND ENGINEERING			English	Article							LOW-DENSITY POLYETHYLENE; BIOMASS; TEMPERATURE; POLYSTYRENE; CELLULOSE; KINETICS; BLENDS	Two totally waste products, agricultural residues and mixed plastic wastes collected from domestic and industrial sectors, are used in this study for the recovery of energy rich biofuel and value-added chemicals. The copyrolysis experiments using fixed bed reactor are conducted in order to analyse the synergetic effects. The experimental works are carried out with different proportion of mixed pl…	[Vibhakar, Chirag] Gujarat Power Engn & Res Inst, Elect Engn Dept, Mehsana 382710, Gujarat, India; [Sabeenian, R. S.] Sona Coll Technol, Dept Elect & Commun Engn, Salem 636005, Tamil Nadu, India; [Kaliappan, S.] Velammal Inst Technol, Dept Mech Engn, Chennai 601204, Tamil Nadu, India; [Patil, Pandurang Y.] Univ Mumbai, Dept Environm Sci, Ratnagiri Sub Campus, Ratnagiri 415639, Maharashtra, India;…	Sona College of Technology; University of Mumbai; Graphic Era University; Karpagam College of Engineering; SNS College of Technology; Arba Minch University	Birhanu, HA (corresponding author), Arba Minch Univ, Arba Minch Inst Technol, Fac Mech Engn, POB 21, Arba Minch, Ethiopia.	chirag.vibhakar@gperi.ac.in; sabeenian@gmail.com; kaliappan261975@gmail.com; pypatil2009@gmail.com; dr.patil@geu.ac.in; pnpmadhu@gmail.com; dr.sowmi100782@gmail.com; habtewold.ababu@amu.edu.et	Patil, Pandurang/GRR-1504-2022; Madhu, Petchimuthu/ACN-3724-2022; Patil, Pravin/AAI-1160-2019; vibhakar, chirag/AGY-9478-2022; Seeniappan, Kaliappan/AAI-5212-2020; R S, Sabeenian/AAP-7619-2020; , Dr. S. kaliappan/I-6944-2016	Madhu, P/0000-0001-8599-219X; Seeniappan, Kaliappan/0000-0001-5203-0867; Sowmya Dhanalakshmi, C/0000-0002-9471-9889; Birhanu, Habtewolde Ababu/0000-0001-8520-291X; R S, Sabeenian/0000-0002-6452-2006; , Dr. S. kaliappan/0000-0002-5021-8759					40	22	22	1	26	HINDAWI LTD	LONDON	ADAM HOUSE, 3RD FLR, 1 FITZROY SQ, LONDON, W1T 5HF, ENGLAND	1687-8434	1687-8442		ADV MATER SCI ENG	Adv. Mater. Sci. Eng.	JAN 3	2022	2022
J	Li, HS; Lyu, X; Xie, WM; Ding, ZY; Liu, Y; Liu, JY; Evrendilek, F; Zheng, RL; Lyu, J; Yang, CX				Li, Huashan; Lyu, XianJin; Xie, Wuming; Ding, Ziyi; Liu, Yong; Liu, Jingyong; Evrendilek, Fatih; Zheng, Ruili; Lyu, Jianfang; Yang, Chunxiao			Co-pyrolytic kinetic and interaction mechanisms and products of pineapple rind and low density polyethylene	JOURNAL OF ANALYTICAL AND APPLIED PYROLYSIS			English	Article						Pineapple rind; Low density polyethylene; Co-pyrolysis; TG-FTIR-GC; MS	TG-FTIR-MS; SEWAGE-SLUDGE; BEECH WOOD; WASTE TEA; BIOMASS; DECOMPOSITION; COMBUSTION; FEEDSTOCK; BIOENERGY; CELLULOSE	The complementariness of biomass residues and plastic waste may be leveraged into fuels and other chemicals via co-pyrolysis in order to decrease our dependence on fossil fuels and increase the circularity of waste streams. The co-pyrolysis of pineapple rind (PR) and low density polyethylene (LDPE) was conducted to characterize its kinetic and interaction mechanisms and products. The co-pyrolysis…	[Li, Huashan; Xie, Wuming; Ding, Ziyi; Liu, Jingyong; Zheng, Ruili] Guangdong Univ Technol, Sch Environm Sci & Engn, Guangzhou 510006, Peoples R China; [Li, Huashan; Lyu, XianJin; Liu, Yong; Zheng, Ruili; Lyu, Jianfang] Guangdong Acad Sci, Inst Comprehens Utilizat Resources & Rare Earth D, State Key Lab Rare Met Separat & Comprehens Utili, Guangzhou 510651, Peoples R China; [Li, Huashan; Lyu, Xia…	Guangdong University of Technology; Guangdong Academy of Sciences; Guangdong Academy of Sciences; Abant Izzet Baysal University	Liu, Y (corresponding author), Guangdong Acad Sci, Inst Comprehens Utilizat Resources & Rare Earth D, State Key Lab Rare Met Separat & Comprehens Utili, Guangzhou 510651, Peoples R China.;Liu, Y (corresponding author), Guangdong Acad Sci, Guangdong Prov Key Lab Dev & Comprehens Utilizat, Guangzhou 510651, Peoples R China.	gzly11@163.com	Ding, Ziyi/KCY-1557-2024; Evrendilek, Fatih/O-2424-2013; YANG, Chunxiao/ABB-9716-2021		National Key Research and Development Project [2020YFC1908904, 2019YFC1908201]; Project of Science and Technology Development of Guangdong Academy of Sciences [2020GDASYL-20200103102]	National Key Research and Development Project(National Key Research & Development Program of China); Project of Science and Technology Development of Guangdong Academy of Sciences	This work was supported by the National Key Research and Development Project (No: 2020YFC1908904 and 2019YFC1908201) and the Project of Science and Technology Development of Guangdong Academy of Sciences (2020GDASYL-20200103102) .Thanks are due to the Guangdong University of Technology Analysis and Test Center and Yibin Lin for assistance with the work) .		60	4	4	7	58	ELSEVIER	AMSTERDAM	RADARWEG 29, 1043 NX AMSTERDAM, NETHERLANDS	0165-2370	1873-250X		J ANAL APPL PYROL	J. Anal. Appl. Pyrolysis	JAN	2023	169
J	Chhabra, V; Shastri, Y; Bhattacharya, S				Chhabra, Vibhuti; Shastri, Yogendra; Bhattacharya, Sankar			Laboratory-Scale Performance of Pyrolysis of Unsegregated Municipal Solid Waste	INDUSTRIAL & ENGINEERING CHEMISTRY RESEARCH			English	Article							CO-PYROLYSIS; SEWAGE-SLUDGE; ROTARY KILN; BIOMASS; MIXTURES; KINETICS	The thermal treatment of the waste converts the carbon in the waste to an energy source. The pyrolysis of the unsegregated municipal solid waste (MSW) and its components is conducted in two different laboratory-scale setups: a tubular and a fluidized bed reactor. The effect of slow and fast pyrolysis and co-pyrolysis of MSW components on the yields, composition, and stability of end products is r…	[Chhabra, Vibhuti] IITB Monash Res Acad, Mumbai 400076, Maharashtra, India; [Chhabra, Vibhuti; Shastri, Yogendra] Indian Inst Technol, Dept Chem Engn, Mumbai 400076, Maharashtra, India; [Chhabra, Vibhuti; Bhattacharya, Sankar] Monash Univ, Dept Chem Engn, Melbourne, Vic 3800, Australia	Indian Institute of Technology System (IIT System); Indian Institute of Technology (IIT) - Bombay; Indian Institute of Technology System (IIT System); Indian Institute of Technology (IIT) - Bombay; Monash University	Shastri, Y (corresponding author), Indian Inst Technol, Dept Chem Engn, Mumbai 400076, Maharashtra, India.	yshastri@iitb.ac.in	Bhattacharya, Sankar/E-6625-2012	Shastri, Yogendra/0000-0002-7498-2233	JSW Steel Ltd.	JSW Steel Ltd.	The authors would like to thank JSW Steel Ltd. for funding this project and Dr. Suman Majumdar, Chief Sustainability Officer at JSW Steel Ltd., for his support. We would also acknowledge SAIF IITB whose SEM-EDX and ICP-AES facilities are utilized for this research.		16	7	7	21	67	AMER CHEMICAL SOC	WASHINGTON	1155 16TH ST, NW, WASHINGTON, DC 20036 USA	0888-5885			IND ENG CHEM RES	Ind. Eng. Chem. Res.	DEC 30	2020	59	52
J	Silori, R; Zang, J; Raval, NP; Giri, BS; Mahlknecht, J; Mora, A; Dueñas-Moreno, J; Tauseef, SM; Kumar, M				Silori, Rahul; Zang, Jian; Raval, Nirav P.; Giri, Balendu Shekher; Mahlknecht, Juergen; Mora, Abrahan; Duenas-Moreno, Jaime; Tauseef, Syed Mohammad; Kumar, Manish			Adsorptive removal of ciprofloxacin and sulfamethoxazole from aqueous matrices using sawdust and plastic waste-derived biochar: A sustainable fight against antibiotic resistance	BIORESOURCE TECHNOLOGY			English	Article						Sawdust; Plastic waste; Antibiotics; Adsorptive removal; Chemisorption	CO-PYROLYSIS; WATER; BIOMASS; PERFORMANCE; SORPTION	We produced carbon-negative biochar from the pyrolysis of sawdust biomass alone (SB) and from the co pyrolysis of sawdust and plastic waste (SPB). The co-pyrolysis approach in this study was driven by several hypothetical factors, such as increased porosity, surface chemistry, stability, as well as waste management. We applied pyrolyzed and co-pyrolyzed biochars for the removal of ciprofloxacin (…	[Silori, Rahul; Giri, Balendu Shekher; Tauseef, Syed Mohammad; Kumar, Manish] UPES Dehradun, Sch Adv Engn, Sustainabil Cluster, Dehra Dun, Uttarakhand, India; [Zang, Jian] Chongqing Univ, Dept Civil Engn, Chongqing, Peoples R China; [Raval, Nirav P.] KSKV Kachchh Univ, Dept Earth & Environm Sci, Bhuj 370001, Gujarat, India; [Mahlknecht, Juergen; Kumar, Manish] Tecnol Monterrey, Escuela Ingn & Cie…	University of Petroleum & Energy Studies (UPES); Chongqing University; Tecnologico de Monterrey; Tecnologico de Monterrey; University of Petroleum & Energy Studies (UPES); University of Tokyo	Kumar, M (corresponding author), Univ Tokyo, Univ Petr & Energy Studies, Sch Engn, Dehra Dun 248007, Uttarakhand, India.	manish.env@gmail.com	kumar, manish/KIE-1953-2024; Tauseef, Syed/G-8919-2012; Raval, Nirav/D-7954-2018; Silori, Rahul/AAP-3723-2020; Giri, Balendu Shekhar/O-8196-2014; Duenas Moreno, Jaime/X-2258-2018; Zang, Jian/GZM-4203-2022	Giri, Balendu Shekhar/0000-0001-5167-9154; Duenas Moreno, Jaime/0000-0003-0844-6042; Zang, Jian/0000-0001-5253-6809; Silori, Dr. Rahul/0000-0002-9897-801X					44	18	18	10	59	ELSEVIER SCI LTD	London	125 London Wall, London, ENGLAND	0960-8524	1873-2976		BIORESOURCE TECHNOL	Bioresour. Technol.	NOV	2023	387
J	Li, D; Lei, SJ; Rajput, G; Zhong, L; Ma, WC; Chen, GY				Li, Dan; Lei, Shijun; Rajput, Gulzeb; Zhong, Lei; Ma, Wenchao; Chen, Guanyi			Study on the co-pyrolysis of waste tires and plastics	ENERGY			English	Article						Co-pyrolysis; Polymer waste; Waste tires (WTs) and waste plastics (WPs) mixture; Thermal decomposition behavior; Kinetics analysis	MUNICIPAL SOLID-WASTE; TG-FTIR; LIGNOCELLULOSIC BIOMASS; CATALYTIC PYROLYSIS; STEAM GASIFICATION; RUBBER TYRE; PY-GC/MS; POLYETHYLENE; OIL; KINETICS	Polymer waste has attracted worldwide attention recently due to its potential environmental risks if not disposed of properly. In this study, waste tires (WTs) and three typical kinds of waste plastics (WPs, PVC, PP, and PE) were selected to investigate the characteristics and products distribution of the co-pyrolysis process via TG-FTIR/MS. DTG curves of WTs and WPs mixture show more than one st…	[Li, Dan; Lei, Shijun; Rajput, Gulzeb; Zhong, Lei; Ma, Wenchao; Chen, Guanyi] Tianjin Univ, Key Lab Efficient Utilizat Low & Medium Grade Ene, Tianjin Key Lab Biomass Waste Utilizat, Sch Environm Sci & Engn,Minist Educ, Tianjin 300050, Peoples R China; [Chen, Guanyi] Tianjin Univ Commerce, Sch Mech Engn, Tianjin 300134, Peoples R China	Tianjin University; Tianjin University of Commerce	Ma, WC (corresponding author), Tianjin Univ, Sch Environm Sci & Technol, 43-b-301,Yaguan Rd 135,Haihe Educ Pk, Tianjin 300350, Peoples R China.	mawc916@tju.edu.cn	MA, Wenchao/O-5325-2015; Li, ZhuoYang/KXR-7635-2024		High Technology Support Project of Tianjin [18ZXSZSF00120]; NSFC [51776139, 51878557, 51668056]	High Technology Support Project of Tianjin; NSFC(National Natural Science Foundation of China (NSFC))	The authors gratefully acknowledge the financial support from High Technology Support Project of Tianjin (18ZXSZSF00120), NSFC (No.51776139, 51878557, 51668056).		56	34	40	13	126	PERGAMON-ELSEVIER SCIENCE LTD	OXFORD	THE BOULEVARD, LANGFORD LANE, KIDLINGTON, OXFORD OX5 1GB, ENGLAND	0360-5442	1873-6785		ENERGY	Energy	JUL 1	2021	226
J	Han, B; Chen, Y; Wu, YL; Hua, DR; Chen, Z; Feng, W; Yang, MD; Xie, QH				Han, Bin; Chen, Yu; Wu, Yulong; Hua, Derun; Chen, Zhen; Feng, Wei; Yang, Mingde; Xie, Quanhua			Co-pyrolysis behaviors and kinetics of plastics-biomass blends through thermogravimetric analysis	JOURNAL OF THERMAL ANALYSIS AND CALORIMETRY			English	Article						Plastics; Sawdust; Co-pyrolysis; Thermogravimetric analysis; Kinetics	WOOD BIOMASS; THERMAL-DECOMPOSITION; POLYPROPYLENE; WASTES; MIXTURES; LIQUIDS; RESIDUE; MODEL	Co-pyrolysis behaviors of plastics-biomass blends were investigated using a thermogravimetric (TG) analysis from room temperature to 873 K with a heating rate of 5-40 K min(-1) in an inert atmosphere. The selected biomass sample was sawdust of pine wood (WS). Polyvinyl chloride (PVC), low-density polyethylene (LDPE), high-density polyethylene (HDPE), and polypropylene (PP) were selected as plasti…	[Han, Bin; Feng, Wei] Tianjin Univ, Sch Mat Sci & Engn, Tianjin 300072, Peoples R China; [Han, Bin; Chen, Yu; Wu, Yulong; Hua, Derun; Chen, Zhen; Yang, Mingde; Xie, Quanhua] Tsinghua Univ, Inst Nucl & New Energy Technol, Beijing 100084, Peoples R China	Tianjin University; Tsinghua University	Feng, W (corresponding author), Tianjin Univ, Sch Mat Sci & Engn, Tianjin 300072, Peoples R China.	wylong@tsinghua.edu.cn; weifeng@tju.edu.cn	wu, yulong/G-8431-2011; Chen, Yu/Y-3292-2019		Program for New Century Excellent Talents in University [NCET-12-0308]; National Natural Science Foundation of China [21176142]; Independent Research Programs of Tsinghua University [2011Z08141]; National High Technology Research and Development Program of China [2008AA06Z342]	Program for New Century Excellent Talents in University(Program for New Century Excellent Talents in University (NCET)); National Natural Science Foundation of China(National Natural Science Foundation of China (NSFC)); Independent Research Programs of Tsinghua University; National High Technology Research and Development Program of China(National High Technology Research and Development Program …	The authors are grateful for the financial supports from Program for New Century Excellent Talents in University (No. NCET-12-0308), National Natural Science Foundation of China (No. 21176142), Independent Research Programs of Tsinghua University (No. 2011Z08141), and National High Technology Research and Development Program of China (No. 2008AA06Z342).		35	125	131	8	143	SPRINGER	DORDRECHT	VAN GODEWIJCKSTRAAT 30, 3311 GZ DORDRECHT, NETHERLANDS	1388-6150	1588-2926		J THERM ANAL CALORIM	J. Therm. Anal. Calorim.	JAN	2014	115	1
J	Chai, Y; Gao, NB; Wang, MH; Wu, CF				Chai, Yue; Gao, Ningbo; Wang, Meihong; Wu, Chunfei			H2 production from co-pyrolysis/gasification of waste plastics and biomass under novel catalyst Ni-CaO-C	CHEMICAL ENGINEERING JOURNAL			English	Article						Pyrolysis and gasification; Biomass; Plastics; Catalyst; H-2 production	MUNICIPAL SOLID-WASTE; HYDROGEN-PRODUCTION; STEAM GASIFICATION; GAS-PRODUCTION; TAR REMOVAL; SYNGAS; CARBON; MIXTURES	Energy security and environmental pollution have been important topics over the world. With depletion of traditional fossil fuels, it is necessary to find new kinds of substitute energies that are green and renewable. Co-pyrolysis/gasification of mixture of waste (i.e. plastics) and biomass is a potential solution and H-2 is an ideal energy carrier with wide range of use. This paper aims to devel…	[Chai, Yue; Wang, Meihong] Univ Sheffield, Dept Chem & Biol Engn, Mappin St, Sheffield S1 3JD, S Yorkshire, England; [Gao, Ningbo] Xi An Jiao Tong Univ, Sch Energy & Power Engn, 28 Xianning West Rd, Xian, Shaanxi, Peoples R China; [Wu, Chunfei] Queens Univ Belfast, Sch Chem & Chem Engn, Univ Rd, Belfast BT7 1NN, Antrim, North Ireland	University of Sheffield; Xi'an Jiaotong University; Queens University Belfast	Wang, MH (corresponding author), Univ Sheffield, Dept Chem & Biol Engn, Mappin St, Sheffield S1 3JD, S Yorkshire, England.;Gao, NB (corresponding author), Xi An Jiao Tong Univ, Sch Energy & Power Engn, 28 Xianning West Rd, Xian, Shaanxi, Peoples R China.	nbogao@xjtu.edu.cn; Meihong.Wang@sheffield.ac.uk	GAO, Ningbo/A-4460-2015; Wu, Chunfei/G-1840-2018; Wang, Professor Meihong/A-6843-2011	Chai, Yue/0009-0003-0005-7760; Wang, Professor Meihong/0000-0001-9752-270X; Wu, Chunfei/0000-0001-7961-1186	EU H2020 Research and Innovation Staff Exchange (RISE) programme [643322]; National Natural Science Foundation of China [51476023, 51306029]; China Postdoctoral Science Foundation [2016M600790, 2016M602828]; Key Research and Development Plan of Shaanxi Province, China [2017GY-167]	EU H2020 Research and Innovation Staff Exchange (RISE) programme; National Natural Science Foundation of China(National Natural Science Foundation of China (NSFC)); China Postdoctoral Science Foundation(China Postdoctoral Science Foundation); Key Research and Development Plan of Shaanxi Province, China	The authors would like acknowledge the financial support of the EU H2020 Research and Innovation Staff Exchange (RISE) programme with project title Development of flexible pyrolysis-catalysis processing of waste plastics for selective production of high value products through research and innovation (Ref: 643322-FLEXI-PYROCAT), National Natural Science Foundation of China (51476023, 51306029), Ch…		41	171	179	51	582	ELSEVIER SCIENCE SA	LAUSANNE	PO BOX 564, 1001 LAUSANNE, SWITZERLAND	1385-8947	1873-3212		CHEM ENG J	Chem. Eng. J.	FEB 15	2020	382
J	Wang, J; Jiang, JC; Zhong, ZP; Wang, K; Wang, XB; Zhang, B; Ruan, R; Li, M; Ragauskas, AJ				Wang, Jia; Jiang, Jianchun; Zhong, Zhaoping; Wang, Kui; Wang, Xiaobo; Zhang, Bo; Ruan, Roger; Li, Mi; Ragauskas, Arthur J.			Catalytic fast co-pyrolysis of bamboo sawdust and waste plastics for enhanced aromatic hydrocarbons production using synthesized CeO2/γ-Al2O3 and HZSM-5	ENERGY CONVERSION AND MANAGEMENT			English	Article						Bamboo sawdust; Waste plastics; Dual catalytic stage; CeO2/gamma-Al2O3; HZSM-5	LOW-DENSITY POLYETHYLENE; FUEL RANGE ALKANES; GRADE BIO-OIL; FLUIDIZED-BED; LIGNOCELLULOSIC BIOMASS; OXYGENATE COMPONENTS; MIXED PLASTICS; CAO; YIELD; CELLULOSE	Fast co-pyrolysis of bamboo sawdust and waste plastic (linear low-density polyethylene, LLDPE) over a dual catalytic stage of synthesized CeO2/gamma-Al2O3 and HZSM-5 was conducted to enhance aromatic hydrocarbons production. Experimental results indicated that the catalyst to biomass (C/B) mass ratio played a determining role in the formation of hydrocarbon intermediates and a C/B mass ratio of 4…	[Wang, Jia; Jiang, Jianchun] Nanjing Forestry Univ, Coll Chem Engn, Longpan Rd 159, Nanjing 210037, Jiangsu, Peoples R China; [Wang, Jia; Jiang, Jianchun; Wang, Kui] Chinese Acad Forestry, Inst Chem Ind Forest Prod, 16 Suojin Five Village, Nanjing 210042, Jiangsu, Peoples R China; [Wang, Jia; Jiang, Jianchun] Nanjing Forestry Univ, Coll Chem Engn, Coinnovat Ctr Efficient Proc & Utilizat Forest Pr…	Nanjing Forestry University; Chinese Academy of Forestry; Institute of Chemical Industry of Forest Products, CAF; Nanjing Forestry University; Southeast University - China; University of Tennessee System; University of Tennessee Knoxville; Nanjing Xiaozhuang University; Cardiff University; University of Minnesota System; University of Minnesota Twin Cities; University of Minnesota System; Univers…	Jiang, JC (corresponding author), Nanjing Forestry Univ, Coll Chem Engn, Longpan Rd 159, Nanjing 210037, Jiangsu, Peoples R China.;Ragauskas, AJ (corresponding author), Univ Tennessee, Dept Chem & Biomol Engn, Knoxville, TN 37996 USA.;Wang, XB (corresponding author), Nanjing Xiaozhuang Univ, Sch Environm Sci, Nanjing 211171, Jiangsu, Peoples R China.	jiangjc@icifp.cn; xb_wang88@126.com; aragausk@utk.edu	LI, Mi/Q-4261-2016; Ruan, Roger/ABE-4317-2021; Zhang, Bo/IZQ-3837-2023; Wang, Xiaobo/AAD-5858-2019; Ragauskas, Arthur/J-7486-2016	Ragauskas, Arthur/0000-0002-3536-554X	National Key Research and Development Program [2017YFD0600805]; National Natural Science Foundation of China [31530010, 31600590, 51776042]; Natural Science Foundation of the Jiangsu Higher Education Institutions of China [17KJB610005]; Nanjing Xiaozhuang University [2016NXY41]	National Key Research and Development Program(National Key Research & Development Program of China); National Natural Science Foundation of China(National Natural Science Foundation of China (NSFC)); Natural Science Foundation of the Jiangsu Higher Education Institutions of China(National Natural Science Foundation of China (NSFC)); Nanjing Xiaozhuang University	The authors are grateful for the National Key Research and Development Program (2017YFD0600805), and the National Natural Science Foundation of China (No. 31530010, No. 31600590, No. 51776042). Natural Science Foundation of the Jiangsu Higher Education Institutions of China (No. 17KJB610005), and a project funded by Nanjing Xiaozhuang University (No. 2016NXY41).		39	63	71	14	181	PERGAMON-ELSEVIER SCIENCE LTD	OXFORD	THE BOULEVARD, LANGFORD LANE, KIDLINGTON, OXFORD OX5 1GB, ENGLAND	0196-8904	1879-2227		ENERG CONVERS MANAGE	Energy Conv. Manag.	SEP 15	2019	196
J	Xu, SN; Cao, B; Uzoejinwa, BB; Odey, EA; Wang, S; Shang, H; Li, CH; Hu, YM; Wang, Q; Nwakaire, JN				Xu, Shannan; Cao, Bin; Uzoejinwa, Benjamin Bernard; Odey, Emmanuel Alepu; Wang, Shuang; Shang, Hao; Li, Chunhou; Hu, Yamin; Wang, Qian; Nwakaire, Joel N.			Synergistic effects of catalytic co-pyrolysis of macroalgae with waste plastics	PROCESS SAFETY AND ENVIRONMENTAL PROTECTION			English	Article						Catalytic co-pyrolysis; Macroalgae; Waste plastics; Synergistic effect; Enhanced biofuels yields	LIGNOCELLULOSIC BIOMASS PYROLYSIS; BIO-OIL PRODUCTION; RENEWABLE ENERGY; PY-GC/MS; THERMAL-DEGRADATION; LAMINARIA-JAPONICA; KINETIC-ANALYSIS; SEWAGE-SLUDGE; RICE HUSK; TG-FTIR	This study unveiled the synergistic effects of catalytic co-pyrolysis of the macroalgae (Enteromorpha prolifera) and waste plastics (HDPE) for enhanced biofuels production. Results revealed that catalytic co-pyrolysis of macroalgae (seaweeds) and waste plastics lowered greatly the high contents of the acids, oxygenates and nitrogen-containing compounds in the seaweed bio-oils, while the aromatics…	[Xu, Shannan; Li, Chunhou] Chinese Acad Fishery Sci, South China Sea Fisheries Res Inst, Key Lab South China Sea Fishery Resources Exploit, Minist Agr, Guangzhou 510300, Peoples R China; [Uzoejinwa, Benjamin Bernard; Odey, Emmanuel Alepu; Wang, Shuang; Shang, Hao; Hu, Yamin; Wang, Qian] Jiangsu Univ, Res Ctr Fluid Machinery Engn & Technol, Zhenjiang 212013, Jiangsu, Peoples R China; [Cao, Bin] Ji…	Chinese Academy of Fishery Sciences; South China Sea Fisheries Research Institute, CAFS; Ministry of Agriculture & Rural Affairs; Jiangsu University; Jiangsu University; University of Nigeria	Uzoejinwa, BB; Wang, S (corresponding author), Jiangsu Univ, Sch Energy & Power Engn, Zhenjiang 212013, Jiangsu, Peoples R China.	benjamin.uzoejinwa@unn.edu.ng; alexjuven@ujs.edu.cn	Hu, Yamin/LFU-2544-2024; Odey, Emmanuel/JRX-1740-2023; Cao, Bin/HGV-2525-2022	Nwakaire, Joel/0000-0001-8179-0048; Odey, Emmanuel/0000-0002-2330-1864; Cao, Bin/0000-0002-0120-086X	National Natural Science Funds Fund of China [51676091]; China Postdoctoral Science Foundation [2019TQ0125, 2019T120408]; Jiangsu Province '333' Project [BRA2019277]; Six Talent Peaks Project in Jiangsu Province [XNY-007]; Ministry of Agriculture, P. R China [NFZX2013]	National Natural Science Funds Fund of China; China Postdoctoral Science Foundation(China Postdoctoral Science Foundation); Jiangsu Province '333' Project; Six Talent Peaks Project in Jiangsu Province; Ministry of Agriculture, P. R China	This work was supported by the National Natural Science Funds Fund of China (51676091), the China Postdoctoral Science Foundation (2019TQ0125, 2019T120408), the Jiangsu Province '333' Project (BRA2019277), the Six Talent Peaks Project in Jiangsu Province (XNY-007, 2018), and Financial Fund of the Ministry of Agriculture, P. R China (No. NFZX2013).		84	158	162	20	268	ELSEVIER	AMSTERDAM	RADARWEG 29, 1043 NX AMSTERDAM, NETHERLANDS	0957-5820	1744-3598		PROCESS SAF ENVIRON	Process Saf. Environ. Protect.	MAY	2020	137
J	Li, JL; Pu, T; Wang, ZH; Liu, TZ				Li, Jiale; Pu, Tao; Wang, Zhanghong; Liu, Taoze			Thermal Behavior and Pyrolysis Kinetics of Mushroom Residue with the Introduction of Waste Plastics	POLYMERS			English	Article						edible fungi residue; waste plastics; co-pyrolysis; thermal behavior; pyrolysis kinetics	BIOMASS FAST PYROLYSIS; CO-PYROLYSIS; DEGRADATION	Co-pyrolysis is considered a very promising technology for the treatment of solid wastes as it can rapidly realize the volume reduction of raw materials and obtain high value-added products. To realize the resource utilization of newly emerging solid wastes in relation to edible fungi residue and waste plastics, mushroom residue (MR), a representative of edible fungi residue, was co-pyrolyzed wit…	[Li, Jiale; Pu, Tao; Wang, Zhanghong; Liu, Taoze] Guizhou Minzu Univ, Coll Ecoenvironm Engn, Guiyang 550025, Peoples R China; [Wang, Zhanghong; Liu, Taoze] Guizhou Minzu Univ, Engn Res Ctr Green & Low Carbon Technol Plast Appl, Guiyang 550025, Peoples R China	Guizhou Minzu University; Guizhou Minzu University	Wang, ZH; Liu, TZ (corresponding author), Guizhou Minzu Univ, Coll Ecoenvironm Engn, Guiyang 550025, Peoples R China.;Wang, ZH; Liu, TZ (corresponding author), Guizhou Minzu Univ, Engn Res Ctr Green & Low Carbon Technol Plast Appl, Guiyang 550025, Peoples R China.	15885794651@163.com; z.wang2021@hotmail.com; liutaoze@foxmail.com	Wang, Zhanghong/AAX-4411-2020	Wang, Zhanghong/0000-0002-0334-033X; Jia Le, Li/0009-0007-5749-6018	National Natural Science Foundation of China [52260018]; Guizhou Provincial Science and Technology Projects [ZK [2022]YB208]; Science and Technology Foundation of Guizhou Provincial Department of Education [KY [2022]182]; Scientific Research Fund of Guizhou Minzu University [GZMUZK [2021]YB13]; Scientific Research Platform of Guizhou Minzu University [GZMUGCZX [2021]02]; Department of Education o…	National Natural Science Foundation of China(National Natural Science Foundation of China (NSFC)); Guizhou Provincial Science and Technology Projects; Science and Technology Foundation of Guizhou Provincial Department of Education; Scientific Research Fund of Guizhou Minzu University; Scientific Research Platform of Guizhou Minzu University; Department of Education of Guizhou Province	The authors greatly acknowledge the funding support from the projects supported by National Natural Science Foundation of China (Grant No. 52260018), the Guizhou Provincial Science and Technology Projects (Grant No. ZK [2022]YB208), the Science and Technology Foundation of Guizhou Provincial Department of Education (Grant No. KY [2022]182), the Scientific Research Fund of Guizhou Minzu University…		39	3	3	8	26	MDPI	BASEL	ST ALBAN-ANLAGE 66, CH-4052 BASEL, SWITZERLAND		2073-4360		POLYMERS-BASEL	Polymers	SEP	2023	15	18
J	Liu, X; Burra, KRG; Wang, ZW; Li, JH; Che, DF; Gupta, AK				Liu, Xuan; Burra, Kiran Raj G.; Wang, Zhiwei; Li, Jinhu; Che, Defu; Gupta, Ashwani K.			Towards enhanced understanding of synergistic effects in co-pyrolysis of pinewood and polycarbonate	APPLIED ENERGY			English	Article						Lignocellulosic biomass; Waste polycarbonate; Co-pyrolysis; Synergistic effects; Feedstock configuration	CATALYTIC PYROLYSIS; STEAM GASIFICATION; LIGNOCELLULOSIC BIOMASS; THERMAL-DECOMPOSITION; HYDROGEN-PRODUCTION; BISPHENOL-A; LIGNIN; HYDRODEOXYGENATION; POLYETHYLENE; MECHANISM	Utilization of biomass and plastic wastes has drawn growing attention in recent years as it offers promising pathway for simultaneous energy production and waste disposal. In this paper, the co-pyrolysis of pinewood and polycarbonate was performed in a fixed bed reactor with focus on determining the extent of synergistic effects and unraveling the underlying synergistic mechanism. The extent of s…	[Liu, Xuan; Burra, Kiran Raj G.; Wang, Zhiwei; Li, Jinhu; Gupta, Ashwani K.] Univ Maryland, Dept Mech Engn, Combust Lab, College Pk, MD 20742 USA; [Liu, Xuan; Che, Defu] Xi An Jiao Tong Univ, Sch Energy & Power Engn, State Key Lab Multiphase Flow Power Engn, Xian 710049, Peoples R China; [Wang, Zhiwei] Henan Univ Technol, Coll Environm Engn, Zhengzhou 450001, Peoples R China; [Li, Jinhu] China Un…	University System of Maryland; University of Maryland College Park; Xi'an Jiaotong University; Henan University of Technology; China University of Mining & Technology	Gupta, AK (corresponding author), Univ Maryland, Dept Mech Engn, Combust Lab, College Pk, MD 20742 USA.	akgupta@umd.edu	Liu, Xuan/KPA-3316-2024; Wang, Zhi-Wei/P-1561-2018; Li, Jinhu/N-8954-2014	Liu, Xuan/0000-0002-6857-0566; Gupta, Ashwani/0000-0001-8047-8706	Office of Naval Research; China Scholarship Council [CSC201906280344]; Ann G. Wylie Dissertation fellowship	Office of Naval Research(United States Department of DefenseUnited States NavyOffice of Naval Research); China Scholarship Council(China Scholarship Council); Ann G. Wylie Dissertation fellowship	This research was supported by Office of Naval Research and their support is gratefully acknowledged. The support provided to the authors (Xuan Liu, Zhiwei Wang, and Jinhu Li) from China Scholarship Council (CSC201906280344) is gratefully acknowledged. K. G. Burra was also supported by Ann G. Wylie Dissertation fellowship and this support is gratefully acknowledged.		53	42	44	11	102	ELSEVIER SCI LTD	OXFORD	THE BOULEVARD, LANGFORD LANE, KIDLINGTON, OXFORD OX5 1GB, OXON, ENGLAND	0306-2619	1872-9118		APPL ENERG	Appl. Energy	MAY 1	2021	289
J	Uçar, S; Özkan, AR; Karagöz, S				Ucar, Suat; Ozkan, Ahmet R.; Karagoz, Selhan			Co-pyrolysis of waste polyolefins with waste motor oil	JOURNAL OF ANALYTICAL AND APPLIED PYROLYSIS			English	Article						Waste polyolefin; Waste motor oil; Liquid fuel; Co-pyrolysis	FLUIDIZED-BED REACTOR; ATACTIC-POLYPROPYLENE APP; HIGH-DENSITY POLYETHYLENE; THERMAL-DEGRADATION; VOLATILE PRODUCTS; HEAVY OIL; KINETICS; PLASTICS; BIOMASS; YIELD	The co-pyrolysis of waste polyolefins [waste polyethylene (PE) and waste polypropylene (PP)] with waste motor oil (WMO) was performed at different ratios under a nitrogen atmosphere at 500 degrees C. The effects of WMO on the pyrolysis of waste polyolefins and their blends were investigated under identical conditions. The addition of WMO into waste polyolefins not only increased the liquid yields…	[Ucar, Suat] Dokuz Eylul Univ, Izmir Vocat Sch, Chem Technol Program, TR-35160 Izmir, Turkey; [Ozkan, Ahmet R.] Petkim Holding Co, Port & Customs Serv Management, TR-35800 Izmir, Turkey; [Karagoz, Selhan] Karabuk Univ, Fac Technol, Dept Polymer Engn, TR-78050 Karabuk, Turkey	Dokuz Eylul University; Petkim Holding; Karabuk University	Uçar, S (corresponding author), Dokuz Eylul Univ, Izmir Vocat Sch, Chem Technol Program, TR-35160 Izmir, Turkey.	suat.ucar@deu.edu.tr	Ucar, Suat/O-7233-2019; Karagoz, Selhan/AAT-4721-2020	Ucar, Suat/0000-0002-4677-3717	Dokuz Eylul University [2015-KB FEN-017]	Dokuz Eylul University(Dokuz Eylul University)	This study was supported by Dokuz Eylul University under the contract 2015-KB FEN-017.		32	52	55	0	67	ELSEVIER SCIENCE BV	AMSTERDAM	PO BOX 211, 1000 AE AMSTERDAM, NETHERLANDS	0165-2370	1873-250X		J ANAL APPL PYROL	J. Anal. Appl. Pyrolysis	MAY	2016	119
J	Du, YF; Ju, TY; Meng, Y; Lan, T; Han, SY; Jiang, JG				Du, Yufeng; Ju, Tongyao; Meng, Yuan; Lan, Tian; Han, Siyu; Jiang, Jianguo			A review on municipal solid waste pyrolysis of different composition for gas production	FUEL PROCESSING TECHNOLOGY			English	Review						Municipal solid waste; Composition; Pyrolysis gas; Excavated MSW; Co-pyrolysis	HIGH-DENSITY POLYETHYLENE; CO-PYROLYSIS; CATALYTIC PYROLYSIS; STEAM GASIFICATION; QUALITY ASSESSMENT; BIOMASS PYROLYSIS; PLASTIC WASTE; MSW; LANDFILL; COMBUSTION	Much research has focused on improving the treatment of municipal solid waste (MSW) to obtain usable energy. Pyrolysis technology can not only reduce the volume of MSW, but also produce pyrolysis oil, pyrolysis gas and char, which have high calorific value and application characteristics and widely used in industrial activities. In this paper, we review research on the pyrolysis of MSW according …	[Du, Yufeng; Ju, Tongyao; Meng, Yuan; Lan, Tian; Han, Siyu; Jiang, Jianguo] Tsinghua Univ, Sch Environm, Beijing 100084, Peoples R China	Tsinghua University	Jiang, JG (corresponding author), Tsinghua Univ, Sch Environm, Beijing 100084, Peoples R China.	jianguoj@mail.tsinghua.edu.cn	Jiang, Yueming/AAJ-5538-2020; Meng, Yuan/AAD-2580-2020	Du, Yufeng/0000-0002-1764-7922; Meng, Yuan/0000-0002-9591-0052					111	53	54	24	264	ELSEVIER	AMSTERDAM	RADARWEG 29, 1043 NX AMSTERDAM, NETHERLANDS	0378-3820	1873-7188		FUEL PROCESS TECHNOL	Fuel Process. Technol.	DEC 15	2021	224
J	Xue, Y; Zhou, S; Brown, RC; Kelkar, A; Bai, XL				Xue, Yuan; Zhou, Shuai; Brown, Robert C.; Kelkar, Atul; Bai, Xianglan			Fast pyrolysis of biomass and waste plastic in a fluidized bed reactor	FUEL			English	Article						Biomass; Plastic; Fast pyrolysis; Pyrolysis-oil; Char	MUNICIPAL SOLID-WASTE; CO-PYROLYSIS; THERMAL-DECOMPOSITION; PART I; TEMPERATURE; MIXTURES; FUEL; GAS; MSW	Co-pyrolysis of red oak and high density polyethylene (HDPE) was conducted in a laboratory-scale, continuous fluidized bed reactor in a temperature range from 525 to 675 degrees C. Pyrolysis products, including two fractions of pyrolysis-oil, non-condensable gases and char were analyzed to assess the influence of pyrolysis temperature and co-feeding of biomass with HDPE. It was found that increas…	[Xue, Yuan; Brown, Robert C.; Kelkar, Atul; Bai, Xianglan] Iowa State Univ, Dept Mech Engn, Ames, IA 50011 USA; [Zhou, Shuai] Iowa State Univ, Bioecon Inst, Ames, IA 50011 USA	Iowa State University; Iowa State University	Bai, XL (corresponding author), Iowa State Univ, 2070 Black Engn Bldg, Ames, IA 50011 USA.	bxl9801@iastate.edu	Brown, Roger/AAD-3893-2019	XUE, Yuan/0000-0002-1442-2058	Iowa Energy center; EPSCoR; Office Of The Director [1101284] Funding Source: National Science Foundation	Iowa Energy center; EPSCoR; Office Of The Director(National Science Foundation (NSF)NSF - Office of the Director (OD)NSF - Office of Integrative Activities (OIA))	The research was supported by Iowa Energy center. The authors would like to thank Tannon Dauggard and Kyle Steen for assistance in operating fluidized bed reactor. Authors also thank Bernardo del Campo for instructions and assistance in conducting the experiment and processing the data of the char BET surface area.		35	262	286	28	482	ELSEVIER SCI LTD	OXFORD	THE BOULEVARD, LANGFORD LANE, KIDLINGTON, OXFORD OX5 1GB, OXON, ENGLAND	0016-2361	1873-7153		FUEL	Fuel	SEP 15	2015	156
J	Déparrois, N; Singh, P; Burra, KG; Gupta, AK				Deparrois, N.; Singh, P.; Burra, K. G.; Gupta, A. K.			Syngas production from co-pyrolysis and co-gasification of polystyrene and paper with CO2	APPLIED ENERGY			English	Article						Paper waste; Polystyrene; Synergistic effects; Co-pyrolysis; CO2 Co-gasification; Waste-to-energy	STEAM GASIFICATION; PLASTIC WASTE; HYDROGEN-PRODUCTION; FLUIDIZED-BED; BIOMASS; TEMPERATURE; KINETICS; FUEL	Co-pyrolysis and CO2 co-gasification of paper and polystyrene blends in different mixture ratios were studied at 1173 K using a laboratory scale tube reactor and thermogravimetric analysis. The chemical composition and yield of the syngas produced was analyzed by a micro gas chromatograph to understand the influence of mixture components. Co-pyrolysis positively impacted the syngas yield exhibiti…	[Deparrois, N.; Singh, P.; Burra, K. G.; Gupta, A. K.] Univ Maryland, Dept Mech Engn, College Pk, MD 20742 USA	University System of Maryland; University of Maryland College Park	Gupta, AK (corresponding author), Univ Maryland, Dept Mech Engn, College Pk, MD 20742 USA.	akgupta@umd.edu	Singh, Paramvir/M-5105-2015	Singh, Paramvir/0000-0001-9481-3026; Gupta, Ashwani/0000-0001-8047-8706; Burra, Kiran Raj Goud/0000-0002-5259-490X	Office of Naval Research (ONR); Indo-US Science and Technology Forum (IUSSTF); La Region Nouvelle -Aquitaine; Ecole Nationale Superieure de Mecanique et d'Aerotechnique (ENSMA)	Office of Naval Research (ONR)(United States Department of DefenseUnited States NavyOffice of Naval Research); Indo-US Science and Technology Forum (IUSSTF); La Region Nouvelle -Aquitaine; Ecole Nationale Superieure de Mecanique et d'Aerotechnique (ENSMA)	This research was supported by the Office of Naval Research (ONR) and its support is gratefully acknowledged. Paramvir Singh was supported by Indo-US Science and Technology Forum (IUSSTF) and their support is gratefully acknowledged. Nicolas Deparrois was supported by La Region Nouvelle -Aquitaine and the Ecole Nationale Superieure de Mecanique et d'Aerotechnique (ENSMA) and their support are als…		43	90	95	6	183	ELSEVIER SCI LTD	OXFORD	THE BOULEVARD, LANGFORD LANE, KIDLINGTON, OXFORD OX5 1GB, OXON, ENGLAND	0306-2619	1872-9118		APPL ENERG	Appl. Energy	JUL 15	2019	246
J	Miskolczi, N; Ates, F				Miskolczi, Norbert; Ates, Funda			Thermo-catalytic co-pyrolysis of recovered heavy oil and municipal plastic wastes	JOURNAL OF ANALYTICAL AND APPLIED PYROLYSIS			English	Article						Waste; Catalyst; Co-pyrolysis; Contaminant; GC-MS	HIGH-QUALITY GASOLINE; VACUUM GAS OIL; DENSITY POLYETHYLENE; BIOMASS; CRACKING	In this work municipal plastic wastes were co-pyrolyzed together with waste plastic derived heavy oil at 500 degrees C in a stirred batch reactor using beta-zeolite, y-zeolite and m-Ni-Mo-catalysts. The effect of the heavy oil/municipal plastic waste ratio to the product properties was basically investigated. Higher pyrolysis oil and gas yields were observed by the using of catalyst and by the re…	[Miskolczi, Norbert] Univ Pannonia, MOL Dept Hydrocarbon & Coal Proc, 10 Egyet U, H-8200 Veszprem, Hungary; [Ates, Funda] Anadolu Univ, Fac Engn, Dept Chem Engn, Iki Eylul Campus, TR-26555 Eskisehir, Turkey	University of Pannonia; Anadolu University	Miskolczi, N (corresponding author), Univ Pannonia, MOL Dept Hydrocarbon & Coal Proc, 10 Egyet U, H-8200 Veszprem, Hungary.	mnorbert@almos.uni-pannon.hu	Ateş, Funda/AAF-5612-2019	Ates, Funda/0000-0002-6693-6093; Miskolczi, Norbert/0000-0003-4862-0148					27	34	35	1	90	ELSEVIER SCIENCE BV	AMSTERDAM	PO BOX 211, 1000 AE AMSTERDAM, NETHERLANDS	0165-2370	1873-250X		J ANAL APPL PYROL	J. Anal. Appl. Pyrolysis	JAN	2016	117
J	Sakirler, F; Tekbas, MD; Wong, HW				Sakirler, Fuat; Tekbas, M. Doga; Wong, Hsi-Wu			Molten plastic induced noncovalent interactions for tunable cellulose fast pyrolysis	GREEN CHEMISTRY			English	Article							CATALYZED CO-PYROLYSIS; GLUCOSE PYROLYSIS; LEVOGLUCOSAN FORMATION; TEMPERATURE PYROLYSIS; PART 2; COPYROLYSIS; BIOMASS; ALPHA-BET(A); POLYETHYLENE; POLYETHENE	Fast pyrolysis of lignocellulosic biomass is a promising approach for producing biofuels and renewable chemicals, but the resultant bio-oil quality and diverse product distributions limit its widespread adaptation. Concurrently, the accumulation of waste plastics in the environment, particularly polyolefin thermoplastics, is becoming a growing threat. Co-pyrolysis of biomass with hydrogen-rich th…	[Sakirler, Fuat; Tekbas, M. Doga; Wong, Hsi-Wu] Univ Massachusetts Lowell, Dept Chem Engn, One Univ Ave, Lowell, MA 01854 USA	University of Massachusetts System; University of Massachusetts Lowell	Wong, HW (corresponding author), Univ Massachusetts Lowell, Dept Chem Engn, One Univ Ave, Lowell, MA 01854 USA.	hsiwu_wong@uml.edu		Sakirler, Fuat/0000-0001-5144-0469; Wong, Hsi-Wu/0000-0003-2623-6145	This work was supported by the National Science Foundation (Award Number CBET-1847289) and completed in part with resources provided by the University of Massachusetts' Green High Performance Computing Cluster (GHPCC). [CBET-1847289]; National Science Foundation	This work was supported by the National Science Foundation (Award Number CBET-1847289) and completed in part with resources provided by the University of Massachusetts' Green High Performance Computing Cluster (GHPCC).; National Science Foundation(National Science Foundation (NSF))	This work was supported by the National Science Foundation (Award Number CBET-1847289) and completed in part with resources provided by the University of Massachusetts' Green High Performance Computing Cluster (GHPCC).		54	1	2	3	27	ROYAL SOC CHEMISTRY	CAMBRIDGE	THOMAS GRAHAM HOUSE, SCIENCE PARK, MILTON RD, CAMBRIDGE CB4 0WF, CAMBS, ENGLAND	1463-9262	1463-9270		GREEN CHEM	Green Chem.	NOV 27	2023	25	23
J	Xie, SY; Ma, C; Kumagai, S; Takahashi, Y; Kameda, T; Saito, Y; Yoshioka, T				Xie, Shengyu; Ma, Chuan; Kumagai, Shogo; Takahashi, Yusuke; Kameda, Tomohito; Saito, Yuko; Yoshioka, Toshiaki			Improving levoglucosan and hydrocarbon production through gas-phase synergy during cellulose and polyolefin co-pyrolysis	SUSTAINABLE ENERGY & FUELS			English	Article							LIGNOCELLULOSIC BIOMASS; DENSITY POLYETHYLENE; PLASTICS; GASIFICATION; PRETREATMENT; REACTOR	The co-pyrolysis of biomass and plastic is a promising technology for producing valuable chemicals. Herein, we report a novel split-flow tube reactor designed to focus on gas-phase synergy during the co-pyrolysis of cellulose and polyolefins, such as polyethylene (PE) and polypropylene (PP), at 650 degrees C in various blending proportions. The split-flow tube reactor significantly enhances levog…	[Xie, Shengyu; Ma, Chuan; Kumagai, Shogo; Takahashi, Yusuke; Kameda, Tomohito; Saito, Yuko; Yoshioka, Toshiaki] Tohoku Univ, Grad Sch Environm Studies, Aoba Ku, 6-6-07 Aoba, Sendai, Miyagi 9808579, Japan; [Kumagai, Shogo] Tohoku Univ, Div Estab Frontier Sci Org Adv Studies, Aoba Ku, 2-1-1 Katahira, Sendai, Miyagi 9808577, Japan	Tohoku University; Tohoku University	Kumagai, S (corresponding author), Tohoku Univ, Grad Sch Environm Studies, Aoba Ku, 6-6-07 Aoba, Sendai, Miyagi 9808579, Japan.;Kumagai, S (corresponding author), Tohoku Univ, Div Estab Frontier Sci Org Adv Studies, Aoba Ku, 2-1-1 Katahira, Sendai, Miyagi 9808577, Japan.	kumagai@tohoku.ac.jp	Kumagai, Shogo/AAU-5332-2020; Ma, Chuan/Y-6143-2018; Kameda, Tomohito/P-7350-2017; Xie, Shengyu/GLR-7118-2022	Ma, Chuan/0000-0002-1731-8934; Kameda, Tomohito/0000-0002-8929-3772; Xie, Shengyu/0000-0002-3893-4082; Kumagai, Shogo/0000-0002-5046-372X	JSPS KAKENHI [19H04306]; JST FOREST Program [JPMJFR206U]; Chinese Scholarship Council (CSC); Grants-in-Aid for Scientific Research [19H04306] Funding Source: KAKEN	JSPS KAKENHI(Ministry of Education, Culture, Sports, Science and Technology, Japan (MEXT)Japan Society for the Promotion of ScienceGrants-in-Aid for Scientific Research (KAKENHI)); JST FOREST Program; Chinese Scholarship Council (CSC)(China Scholarship Council); Grants-in-Aid for Scientific Research(Ministry of Education, Culture, Sports, Science and Technology, Japan (MEXT)Japan Society for the …	This work was supported by JSPS KAKENHI (Grant number: 19H04306) and the JST FOREST Program (Grant number: JPMJFR206U). Shengyu Xie was supported by the Chinese Scholarship Council (CSC).		44	5	5	7	47	ROYAL SOC CHEMISTRY	CAMBRIDGE	THOMAS GRAHAM HOUSE, SCIENCE PARK, MILTON RD, CAMBRIDGE CB4 0WF, CAMBS, ENGLAND	2398-4902			SUSTAIN ENERG FUELS	Sustain. Energ. Fuels	MAR 15	2022	6	6
J	Yansaneh, OY; Zein, SH				Yansaneh, Osman Y.; Zein, Sharif H.			Recent Advances on Waste Plastic Thermal Pyrolysis: A Critical Overview	PROCESSES			English	Article						detailed review; waste plastics; environmental pollution; thermal pyrolysis; pyrolysis factors; future research needs	HIGH-DENSITY POLYETHYLENE; MUNICIPAL SOLID-WASTE; FLUIDIZED-BED REACTOR; CO-PYROLYSIS; CATALYTIC PYROLYSIS; HYDROGEN-PRODUCTION; MIXED PLASTICS; BATCH REACTOR; PART II; TEMPERATURE	Post-consumer plastic management, otherwise termed waste plastic (WP) management, is a great challenge in today's world, mainly because of its characteristic biodegradation properties. The quantity of waste plastics correspondingly increases with the increase in demand for plastic use. Research has shown that this demand increases yearly. Most of these waste plastics include high-density polyethy…	[Yansaneh, Osman Y.; Zein, Sharif H.] Univ Hull UoH, Dept Chem Engn, Fac Sci & Engn, Kingston Upon Hull HU6 7RX, Yorks, England		Zein, SH (corresponding author), Univ Hull UoH, Dept Chem Engn, Fac Sci & Engn, Kingston Upon Hull HU6 7RX, Yorks, England.	o.yansaneh-2015@hull.ac.uk; s.h.zein@hull.ac.uk	Zein, Sharif/AAB-8401-2022	Zein, Sharif/0000-0002-8863-1450	Common-wealth Scholarships Commission; University of Hull	Common-wealth Scholarships Commission; University of Hull	The first author, Osman Yusifu Yansaneh, wishes to acknowledge the Common-wealth Scholarships Commission for their continued sponsorship in his studies. Appreciations go to the University of Hull also for partnering in sponsoring his programme.		106	31	33	3	105	MDPI	BASEL	MDPI AG, Grosspeteranlage 5, CH-4052 BASEL, SWITZERLAND		2227-9717		PROCESSES	Processes	FEB	2022	10	2
J	Chen, JW; Ma, XQ; Yu, ZS; Deng, TH; Chen, XF; Chen, L; Dai, MQ				Chen, Jiawei; Ma, Xiaoqian; Yu, Zhaosheng; Deng, Tonghui; Chen, Xinfei; Chen, Lin; Dai, Minquan			A study on catalytic co-pyrolysis of kitchen waste with tire waste over ZSM-5 using TG-FTIR and Py-GC/MS	BIORESOURCE TECHNOLOGY			English	Article						Co-pyrolysis; Kitchen waste; Tire waste; ZSM-5; TG-FTIR; Py-GC/MS	MUNICIPAL SOLID-WASTE; FOOD WASTE; THERMOGRAVIMETRIC ANALYSIS; CHLORELLA-VULGARIS; PAPER SLUDGE; OIL-SHALE; BIOMASS; CONVERSION; PLASTICS; SULFUR	Co-pyrolysis characteristics of kitchen waste (KW) with tire waste (TW) were studied by TGA-FTIR and Py-GC/MS. The kinetic parameters were calculated by Ozawa-Flynn-Wall (OFW) and the Kissinger-Akahira-Sunose (KAS) methods. TGA-FTIR results indicated that CO2, CO, NO, NH3, SO2, CeH and C=C groups were the main gases released from the pyrolysis process, finding that a certain coupling synergistic …	[Chen, Jiawei; Ma, Xiaoqian; Yu, Zhaosheng; Deng, Tonghui; Chen, Xinfei; Chen, Lin; Dai, Minquan] South China Univ Technol, Sch Elect Power, Guangdong Prov Key Lab Efficient & Clean Energy U, 381 Wushan Rd, Guangzhou 510640, Guangdong, Peoples R China	South China University of Technology	Ma, XQ (corresponding author), South China Univ Technol, Sch Elect Power, Guangdong Prov Key Lab Efficient & Clean Energy U, 381 Wushan Rd, Guangzhou 510640, Guangdong, Peoples R China.	epxqma@scut.edu.cn	Yu, Zhaosheng/T-8028-2019	chen, jiawei/0000-0002-4668-5418; Yu, Zhaosheng/0000-0002-2311-4030	National Key R&D Program of China [2018YFC1901200]; National Natural Science Foundation of China [51476060]; Guangdong Province Key Laboratory of Efficient and Clean Energy Utilization [2013A061401005]	National Key R&D Program of China; National Natural Science Foundation of China(National Natural Science Foundation of China (NSFC)); Guangdong Province Key Laboratory of Efficient and Clean Energy Utilization	This work was supported by the National Key R&D Program of China (2018YFC1901200); National Natural Science Foundation of China (51476060); Guangdong Province Key Laboratory of Efficient and Clean Energy Utilization (2013A061401005).		49	96	97	8	227	ELSEVIER SCI LTD	OXFORD	THE BOULEVARD, LANGFORD LANE, KIDLINGTON, OXFORD OX5 1GB, OXON, ENGLAND	0960-8524	1873-2976		BIORESOURCE TECHNOL	Bioresour. Technol.	OCT	2019	289
J	Mishra, RK; Chistie, SM; Naik, SU; Kumar, P				Mishra, Ranjeet Kumar; Chistie, Syeda Minnat; Naik, Sneha Ullhas; Kumar, Pardeep			Thermocatalytic co-pyrolysis of waste biomass and plastics: Studies of physicochemical properties, kinetics behaviour, and characterization of liquid product	JOURNAL OF THE ENERGY INSTITUTE			English	Article						Waste biomass; Plastics; Co -pyrolysis; Catalyst; GC -MS; Pyrolytic oil; Activation energy	BIO-OIL; CATALYTIC PYROLYSIS; LIGNOCELLULOSIC BIOMASS; RECENT PROGRESS; FUEL; HYDROCARBONS; POLYSTYRENE; CONVERSION; YIELD; SEEDS	The thermocatalytic co-pyrolysis of pine wood and plastics (waste nitrile gloves (WNG) and polystyrene (PS)) into renewable liquid fuel was the focus of the current study. The pyrolysis test is executed in a semi-batch reactor at 600 degrees C, 80 degrees C min-1 heating rate, and 100 mL min-1 nitrogen flow rate. The waste plastics and MgO were mixed with PW at 10, 20, and 30 wt% loadings, respec…	[Mishra, Ranjeet Kumar; Chistie, Syeda Minnat; Naik, Sneha Ullhas] MS Ramaiah Inst Technol, Dept Chem Engn, Bangalore 560054, Karnataka, India; [Kumar, Pardeep] Indian Inst Technol IIT BHU, Dept Chem Engn, Varanasi 221005, India	Ramaiah Institute of Technology; Indian Institute of Technology System (IIT System); Indian Institute of Technology BHU Varanasi (IIT BHU Varanasi)	Mishra, RK (corresponding author), MS Ramaiah Inst Technol, Dept Chem Engn, Bangalore 560054, Karnataka, India.	m.ranjeet1989@msrit.edu	MISHRA, RANJEET/AAQ-9451-2020	MISHRA, Dr. RANJEET KUMAR/0000-0002-6138-8729					70	18	18	1	39	ELSEVIER SCI LTD	OXFORD	THE BOULEVARD, LANGFORD LANE, KIDLINGTON, OXFORD OX5 1GB, OXON, ENGLAND	1743-9671	1746-0220		J ENERGY INST	J. Energy Inst.	DEC	2022	105
J	Al-Maari, MA; Ahmad, MA; Din, ATM; Hassan, H; Alsobaai, AM				Al-Maari, Mohammed Abobakr; Ahmad, Mohd Azmier; Din, Azam Taufik Mohd; Hassan, Hamizura; Alsobaai, Ahmed Mubarak			Co-pyrolysis of oil palm empty fruit bunch and oil palm frond with low-density polyethylene and polypropylene for bio-oil production	ARABIAN JOURNAL OF CHEMISTRY			English	Article						Co-pyrolysis; Bio-oil; Biomass-plastic blend; Empty fruit bunch; Palm frond; Low-density polyethylene; Polypropylene	LIGNOCELLULOSIC BIOMASS; PLASTICS INFLUENCE; CHAR	Co-pyrolysis of palm wastes of empty fruit bunch (EFB) and palm frond (PF) with low density polyethylene (LDPE) and polypropylene (PP) were investigated to find the synergistic effect of biomass-plastic pair on the yield and composition of bio-oil produced. The pyrolysis process of individual materials and their corresponding blends were employed in a fixed bed reactor at heating rate of 20 degre…	[Al-Maari, Mohammed Abobakr; Ahmad, Mohd Azmier; Din, Azam Taufik Mohd] Univ Sains Malaysia, Sch Chem Engn, Engn Campus, Nibong Tebal 14300, Penang, Malaysia; [Hassan, Hamizura] Univ Teknol MARA UiTM Cawangan Pulau Pinang, Fac Chem Engn, Permatang Pauh 13500, Penang, Malaysia; [Al-Maari, Mohammed Abobakr; Alsobaai, Ahmed Mubarak] Hadhramout Univ, Fac Engn & Petr, Chem Engn Dept, Mukalla, Yemen	Universiti Sains Malaysia	Ahmad, MA (corresponding author), Univ Sains Malaysia, Sch Chem Engn, Engn Campus, Nibong Tebal 14300, Penang, Malaysia.	chazmier@usm.my	Alsobaai, Ahmed/AAU-1447-2020; Hassan, Hamizura/HDO-2268-2022; Mohd Din, Azam Taufik/A-4774-2012; Ahmad, Mohd Azmier/B-3246-2011	Mohd Din, Azam Taufik/0000-0002-9075-5989; Al-Maari, Mohammed Abobakr/0009-0006-5587-1753; Ahmad, Mohd Azmier/0000-0001-8412-2491; Hassan, Hamizura/0000-0003-2266-2315	Lotte Chemical Titan (M) Sdn Bhd, Pasir Gudang, Johor, Malaysia; Universiti Sains Malaysia [304/PJKIMIA/6050422/L128]	Lotte Chemical Titan (M) Sdn Bhd, Pasir Gudang, Johor, Malaysia; Universiti Sains Malaysia(Universiti Sains Malaysia)	The authors thankfully acknowledge the support obtained from the Lotte Chemical Titan (M) Sdn Bhd, Pasir Gudang, Johor, Malaysia and Universiti Sains Malaysia (Grant Number: 304/PJKIMIA/6050422/L128) in the form of research grant and facilities.		51	32	32	3	36	ELSEVIER	AMSTERDAM	RADARWEG 29, 1043 NX AMSTERDAM, NETHERLANDS	1878-5352	1878-5379		ARAB J CHEM	Arab. J. Chem.	AUG	2021	14	8
J	Tian, XJ; Bian, XY; Zeng, ZH; Xu, JM; Dai, AQ; Ke, LY; Zeng, Y; Wu, QH; Liu, YH; Cobb, K; Ruan, RG; Wang, YP				Tian, Xiaojie; Bian, Xinyu; Zeng, Zihong; Xu, Jiamin; Dai, Anqi; Ke, Linyao; Zeng, Yuan; Wu, Qiuhao; Liu, Yuhuan; Cobb, Kirk; Ruan, Roger; Wang, Yunpu			Production of monocyclic aromatic hydrocarbons by segmented in situ and ex situ two-stage coupled catalytic co-pyrolysis of biomass and waste plastics	GREEN CHEMISTRY			English	Article							BIO-OIL; POLYETHYLENE; POLYPROPYLENE; CELLULOSE; BEHAVIOR; CARBON; XYLAN	Co-pyrolysis of biomass and waste plastics has the potential to produce high-quality chemicals and these resources are recycled to realize their clean and efficient utilization. However, the current co-pyrolysis technology often mixes them physically, which can cause key problems, such as large differences in pyrolysis characteristics, restricting the synergistic effect of co-pyrolysis intermedia…	[Tian, Xiaojie; Bian, Xinyu; Zeng, Zihong; Xu, Jiamin; Dai, Anqi; Ke, Linyao; Zeng, Yuan; Wu, Qiuhao; Liu, Yuhuan; Wang, Yunpu] Nanchang Univ, Engn Res Ctr Biomass Convers, State Key Lab Food Sci & Technol, Minist Educ, Nanchang 330047, Peoples R China; [Cobb, Kirk; Ruan, Roger] Univ Minnesota, Ctr Biorefining, 1390 Eckles Ave, St Paul, MN 55108 USA; [Cobb, Kirk; Ruan, Roger] Univ Minnesota, Dept…	Nanchang University; University of Minnesota System; University of Minnesota Twin Cities; University of Minnesota System; University of Minnesota Twin Cities	Wang, YP (corresponding author), Nanchang Univ, Engn Res Ctr Biomass Convers, State Key Lab Food Sci & Technol, Minist Educ, Nanchang 330047, Peoples R China.		Wu, Qiuhao/HNO-8620-2023; Ruan, Roger/ABE-4317-2021; Bian, Xin-Yu/J-4594-2015		National Natural Science Foundation of China; Jiangxi Provincial Natural Science Foundation; Major Discipline Academic and Technical Leaders Training Program of Jiangxi Province; Centrally Guided Local Science Technology Special Project; [52166015]; [22166026]; [20212ACB215007]; [20204BCJ23011]; [20202ZDB01012]	National Natural Science Foundation of China(National Natural Science Foundation of China (NSFC)); Jiangxi Provincial Natural Science Foundation; Major Discipline Academic and Technical Leaders Training Program of Jiangxi Province; Centrally Guided Local Science Technology Special Project; ; ; ; ;	This project was financially supported by the National Natural Science Foundation of China (No. 52166015; No. 22166026), the Jiangxi Provincial Natural Science Foundation (20212ACB215007), the Major Discipline Academic and Technical Leaders Training Program of Jiangxi Province (20204BCJ23011), and the Centrally Guided Local Science Technology Special Project (20202ZDB01012). We thank Jun Chen (Na…		37	15	16	18	97	ROYAL SOC CHEMISTRY	CAMBRIDGE	THOMAS GRAHAM HOUSE, SCIENCE PARK, MILTON RD, CAMBRIDGE CB4 0WF, CAMBS, ENGLAND	1463-9262	1463-9270		GREEN CHEM	Green Chem.	NOV 28	2022	24	23
J	Muniyappan, D; Pereira, AO Jr; Vinayakaselvi, MA; Ramanathan, A				Muniyappan, Dineshkumar; Pereira Jr, Amaro Olimpio; Vinayakaselvi, M. Angkayarkan; Ramanathan, Anand			Synergistic recovery of renewable hydrocarbon resources via microwave co-pyrolysis of biomass residue and plastic waste over spent toner catalyst towards sustainable solid waste management	ENERGY			English	Article						Co -pyrolysis; Microwave; Bio-oil; Biomass; E -Waste; Spent toner powder	HIGH-DENSITY POLYETHYLENE; BIO-OIL; ASSISTED PYROLYSIS; FUEL; POLYSTYRENE; LIQUID; MICROALGAE; CONVERSION; BIOFUELS; LIGNIN	The present study unveiled the effect of operating temperature, blending ratio and catalyst addition on the product distribution during microwave co-pyrolysis of Hydnocarpus de-oiled seed cake (HDSC) and Waste electrical and electronic plastic (WEEP). In this work, a new approach of treatment of wastes with waste was proposed by converting spent toner powder into a low-cost catalyst. Initially, c…	[Muniyappan, Dineshkumar; Ramanathan, Anand] Natl Inst Technol, Dept Mech Engn, Bio Energy Lab, Tiruchirappalli 620015, India; [Pereira Jr, Amaro Olimpio] Univ Fed Rio De Janeiro, Inst Grad Studies Engn Alberto Luiz Coimbra COPPE, Energy Planning Programme PPE, Rio De Janeiro, Brazil; [Vinayakaselvi, M. Angkayarkan] Bharathidasan Univ, Dept English, Tiruchirappalli, Tamil Nadu, India	National Institute of Technology (NIT System); National Institute of Technology Tiruchirappalli; Universidade Federal do Rio de Janeiro; Bharathidasan University	Ramanathan, A (corresponding author), Natl Inst Technol, Dept Mech Engn, Bio Energy Lab, Tiruchirappalli 620015, India.	anandachu@nitt.edu	Pereira, Amaro/J-3067-2018; Ramanathan, Anand/AAS-7185-2020; Muniyappan, Dineshkumar/ACA-2858-2022	Ramanathan, Anand/0000-0002-2243-1413; Pereira Jr, Amaro Olimpio/0000-0001-9766-1080; Muniyappan, Dineshkumar/0000-0002-4586-3542	Scheme for Promotion of Academic and Research Collaboration, MHRD, India [SPARC/2018 - 2019/P965/SL]	Scheme for Promotion of Academic and Research Collaboration, MHRD, India	The authors would like to extend their gratitude to the Scheme for Promotion of Academic and Research Collaboration, MHRD, India (Project no. SPARC/2018 - 2019/P965/SL) for partly funding this project work. The authors further express sincere thanks to the director of the National Institute of Technology, Tiruchirappalli, for allowing us to conduct this research work at the institute.		68	12	13	3	27	PERGAMON-ELSEVIER SCIENCE LTD	OXFORD	THE BOULEVARD, LANGFORD LANE, KIDLINGTON, OXFORD OX5 1GB, ENGLAND	0360-5442	1873-6785		ENERGY	Energy	SEP 1	2023	278
J	Xue, Y; Bai, XL				Xue, Yuan; Bai, Xianglan			Synergistic enhancement of product quality through fast co-pyrolysis of acid pretreated biomass and waste plastic	ENERGY CONVERSION AND MANAGEMENT			English	Article						Corn stover; Polyethylene; Pyrolysis; Acid pretreatment; Catalyst; Zeolite	FLUIDIZED-BED REACTOR; LIGNIN-DERIVED OLIGOMERS; CATALYTIC FAST PYROLYSIS; BIO-OIL PRODUCTION; WOOD BIOMASS; DOUGLAS-FIR; TEMPERATURE; POLYETHYLENE; MIXTURES; YIELDS	With the increasing global production of plastics, co-pyrolyzing biomass and waste plastics has emerged as a promising way to improve the quality of pyrolysis products. In the present study, the possibility of enhancing the synergistic interactions between biomass and plastics was explored by co-pyrolyzing acid pretreated corn stover (CS) and polyethylene (PE) in the presence or absence of zeolit…	[Xue, Yuan; Bai, Xianglan] Iowa State Univ, Dept Mech Engn, Ames, IA 50011 USA	Iowa State University	Bai, XL (corresponding author), Iowa State Univ, 2070 Black Engn Bldg, Ames, IA 50011 USA.	bxl9801@iastate.edu		XUE, Yuan/0000-0002-1442-2058	Iowa Energy Center	Iowa Energy Center	This research is supported by Iowa Energy Center. The authors would like to thank Xiangwei Niu for his assistantship in conducting the experimental study, and Prof. Robert Brown and his staff members at Bioeconomy Institute of Iowa State University for instrumental and technical support.		46	74	85	7	123	PERGAMON-ELSEVIER SCIENCE LTD	OXFORD	THE BOULEVARD, LANGFORD LANE, KIDLINGTON, OXFORD OX5 1GB, ENGLAND	0196-8904	1879-2227		ENERG CONVERS MANAGE	Energy Conv. Manag.	MAY 15	2018	164
J	Zhao, ZY; Abdo, SMA; Wang, XJ; Li, H; Li, XG; Gao, X				Zhao, Zhenyu; Abdo, Salah Mohammed Abdullah; Wang, Xiaojun; Li, Hong; Li, Xingang; Gao, Xin			Process intensification on co-pyrolysis of polyethylene terephthalate wastes and biomass via microwave energy: Synergetic effect and roles of microwave susceptor	JOURNAL OF ANALYTICAL AND APPLIED PYROLYSIS			English	Article						Microwave; Co-pyrolysis; PET wastes; Synergetic effect; Microwave susceptor	HIGH-DENSITY POLYETHYLENE; ASSISTED PYROLYSIS; CATALYTIC PYROLYSIS; HYDROCARBONS; COMBUSTION; WOOD; BED; POLYSTYRENE; TEMPERATURE; KINETICS	The present study employs microwave (MW) energy to enhance the co-pyrolysis of polyethylene terephthalate (PET) wastes and biomass. Based on the characterization of raw materials as well as gas and liquid products, we propose a pyrolysis mechanism of PET and biomass during microwave-assisted pyrolysis (MAP). The MAP of PET-biomass blends shows a synergetic effect that the interaction between PET …	[Zhao, Zhenyu; Abdo, Salah Mohammed Abdullah; Wang, Xiaojun; Li, Hong; Li, Xingang; Gao, Xin] Tianjin Univ, Natl Engn Res Ctr Distillat Technol, Collaborat Innovat Ctr Chem Sci & Engn Tianjin, Sch Chem Engn & Technol, Tianjin 300072, Peoples R China	Tianjin University	Li, H; Gao, X (corresponding author), Tianjin Univ, Natl Engn Res Ctr Distillat Technol, Collaborat Innovat Ctr Chem Sci & Engn Tianjin, Sch Chem Engn & Technol, Tianjin 300072, Peoples R China.	lihongtju@tju.edu.cn; gaoxin@tju.edu.cn	Gao, Xin/C-7209-2019; Gao, Xin/C-4604-2017	abdo, salah mohammed abdullah/0009-0001-1092-0631; Gao, Xin/0000-0002-0739-8440; Zhao, Zhenyu/0000-0002-4337-8164	National Nature Science Foundation of China [21878219]	National Nature Science Foundation of China(National Natural Science Foundation of China (NSFC))	The authors acknowledge financial support from the National Nature Science Foundation of China (No. 21878219) .		45	37	39	5	83	ELSEVIER	AMSTERDAM	RADARWEG 29, 1043 NX AMSTERDAM, NETHERLANDS	0165-2370	1873-250X		J ANAL APPL PYROL	J. Anal. Appl. Pyrolysis	SEP	2021	158
J	Li, D; Lei, SJ; Wang, P; Zhong, L; Ma, WC; Chen, GY				Li, Dan; Lei, Shijun; Wang, Ping; Zhong, Lei; Ma, Wenchao; Chen, Guanyi			Study on the pyrolysis behaviors of mixed waste plastics	RENEWABLE ENERGY			English	Article						Pyrolysis; Waste plastics; TG-FTIR; Kinetics	MUNICIPAL SOLID-WASTE; TG-FTIR; CO-PYROLYSIS; THERMAL-DEGRADATION; STEAM GASIFICATION; PVC; KINETICS; BIOMASS; SLUDGE; MODEL	Pyrolysis is considered as a promising technology to recover valuable hydrocarbons from waste streams. Even though some studies exist on waste plastics pyrolysis, it still lacks of in-depth knowledge on multiple components plastics pyrolysis. This study explores three types of waste plastics and their mixed forms to obtain thermal cracking features, products distribution, and kinetic features. TG…	[Li, Dan; Lei, Shijun; Wang, Ping; Zhong, Lei; Ma, Wenchao; Chen, Guanyi] Tianjin Univ, Sch Environm Sci & Engn, Tianjin Key Lab Biomass Waste Utilizat,Minist Edu, Key Lab Efficient Utilizat Low & Medium Grade Ene, Tianjin 300350, Peoples R China; [Chen, Guanyi] Tibet Univ, Sch Sci, Lhasa 850000, Tibet, Peoples R China	Tianjin University; Tibet University	Ma, WC (corresponding author), Tianjin Univ, Sch Environm Sci & Technol, 43-b-301,Yaguan Rd 135,Haihe Educ Pk, Tianjin 300350, Peoples R China.	mawc916@tju.edu.cn	Wang, Ping/GPP-2471-2022; MA, Wenchao/O-5325-2015; Li, ZhuoYang/KXR-7635-2024		Tianjin Science and Technology Project [18ZXSZSF00120]; NSFC [5177061103, 51776139, 51676138]	Tianjin Science and Technology Project; NSFC(National Natural Science Foundation of China (NSFC))	The authors gratefully acknowledge Efomah Andrew Ndudi for revising the language structure. The authors also gratefully acknowledge the financial support from Tianjin Science and Technology Project (No.18ZXSZSF00120) and the NSFC (No. 5177061103, 51776139, 51676138).		35	64	74	24	235	PERGAMON-ELSEVIER SCIENCE LTD	OXFORD	THE BOULEVARD, LANGFORD LANE, KIDLINGTON, OXFORD OX5 1GB, ENGLAND	0960-1481	1879-0682		RENEW ENERG	Renew. Energy	AUG	2021	173
J	Abomohra, AF; Sheikh, HMA; El-Naggar, AH; Wang, QY				Abomohra, Abd El-Fatah; Sheikh, Huda M. A.; El-Naggar, Amal H.; Wang, Qingyuan			Microwave vacuum co-pyrolysis of waste plastic and seaweeds for enhanced crude bio-oil recovery: Experimental and feasibility study towards industrialization	RENEWABLE & SUSTAINABLE ENERGY REVIEWS			English	Article						Biofuel; Circular economy; Plastic wastes; Seaweeds; Thermal degradation; Waste recycling	HIGH-DENSITY POLYETHYLENE; OF-THE-ART; BIOFUEL PRODUCTION; ASSISTED PYROLYSIS; SILICON-CARBIDE; CATALYTIC PYROLYSIS; ENERGY-CONVERSION; PRODUCT FORMATION; PALM OIL; BIOMASS	Waste-to-energy is a promising approach to tackle the energy shortage and reduce the environmental pollution. The present study aimed to evaluate the technical and economic feasibility of microwave vacuum co-pyrolysis of seaweeds and low-density polyethylene (LDPE). Although the three studied seaweeds namely; Ulva intestinalis, Sargassum polycystum, and Hypnea valentiae showed similar thermal wei…	[Abomohra, Abd El-Fatah; Wang, Qingyuan] Chengdu Univ, Sch Architecture & Civil Engn, Dept Environm Engn, Chengdu 610106, Peoples R China; [Abomohra, Abd El-Fatah; El-Naggar, Amal H.] Tanta Univ, Fac Sci, Bot & Microbiol Dept, Tanta 31527, Egypt; [Sheikh, Huda M. A.] Univ Jeddah, Fac Sci, Biol Dept, Jeddah 21589, Saudi Arabia	Chengdu University; Egyptian Knowledge Bank (EKB); Tanta University; University of Jeddah	Abomohra, AF (corresponding author), Chengdu Univ, Sch Architecture & Civil Engn, New Energy & Environm Lab NEEL, Chengdu 610106, Peoples R China.	abomohra@yahoo.com	WANG, Qing/G-5024-2010; Abomohra, Abdelfatah/J-1006-2016	WANG, Qingyuan/0000-0002-3439-287X; Abomohra, Abdelfatah/0000-0003-2784-3297	National Natural Science Foundation of China [52050410328, NSFC11572057, NSFC11832007]; start-up funds for high-end talents of Chengdu University [2081920048]	National Natural Science Foundation of China(National Natural Science Foundation of China (NSFC)); start-up funds for high-end talents of Chengdu University	This work was financially funded by National Natural Science Foundation of China (52050410328, NSFC11572057, NSFC11832007) and start-up funds for high-end talents of Chengdu University (2081920048) .		124	57	58	6	94	PERGAMON-ELSEVIER SCIENCE LTD	OXFORD	THE BOULEVARD, LANGFORD LANE, KIDLINGTON, OXFORD OX5 1GB, ENGLAND	1364-0321	1879-0690		RENEW SUST ENERG REV	Renew. Sust. Energ. Rev.	OCT	2021	149
J	Ma, C; Xie, SY; Kumagai, S; Takahashi, Y; Saito, Y; Kameda, T; Yoshioka, T				Ma, Chuan; Xie Shengyu; Kumagai, Shogo; Takahashi, Yusuke; Saito, Yuko; Kameda, Tomohito; Yoshioka, Toshiaki			Synergistic effects during co-pyrolysis of milled wood lignin and polyolefins at the gas phase and liquid/solid phase contacting modes	CHEMICAL ENGINEERING JOURNAL			English	Article						Lignin; Polyolefin; Co-pyrolysis; Liquid; Solid phase interaction; Gas phase interaction	PLASTIC WASTE; POLYETHYLENE; BIOMASS; POLYPROPYLENE; GASIFICATION; MIXTURES; POLYMERS	Co-pyrolysis of biomass and waste plastics is the preferred technology for enhancing the production of fuels and valuable chemicals. Here, we studied the co-pyrolysis of milled wood lignin (MWL) with polyethylene (PE) and polypropylene (PP) at various weight ratios by thermogravimetry (TG), evolved gas analysis-mass spectrometry (EGA-MS), and product recovery tests using a fixed-bed reactor. Two …	[Ma, Chuan; Xie Shengyu; Kumagai, Shogo; Takahashi, Yusuke; Saito, Yuko; Kameda, Tomohito; Yoshioka, Toshiaki] Tohoku Univ, Grad Sch Environm Studies, Aoba Ku, 6-6-07 Aoba, Sendai, Miyagi 9808579, Japan; [Kumagai, Shogo] Tohoku Univ, Div Estab Frontier Sci Org Adv Studies, Aoba Ku, 2-1-1 Katahira, Sendai, Miyagi 9808577, Japan	Tohoku University; Tohoku University	Ma, C; Kumagai, S (corresponding author), Tohoku Univ, Grad Sch Environm Studies, Aoba Ku, 6-6-07 Aoba, Sendai, Miyagi 9808579, Japan.	machuan628@163.com; kumagai@tohoku.ac.jp	Kameda, Tomohito/P-7350-2017; Kumagai, Shogo/AAU-5332-2020; Xie, Shengyu/GLR-7118-2022; Ma, Chuan/Y-6143-2018	Ma, Chuan/0000-0002-1731-8934	Japan Society for the Promotion of Science (JSPS) KAKENHI [20F20089, 19H04306]; JST FOREST Program [JPMJFR206U]; JSPS; Grants-in-Aid for Scientific Research [20F20089] Funding Source: KAKEN	Japan Society for the Promotion of Science (JSPS) KAKENHI(Ministry of Education, Culture, Sports, Science and Technology, Japan (MEXT)Japan Society for the Promotion of ScienceGrants-in-Aid for Scientific Research (KAKENHI)); JST FOREST Program; JSPS(Ministry of Education, Culture, Sports, Science and Technology, Japan (MEXT)Japan Society for the Promotion of Science); Grants-in-Aid for Scientifi…	& nbsp;This study was supported by the Japan Society for the Promotion of Science (JSPS) KAKENHI (grant numbers: 20F20089 and 19H04306) and the JST FOREST Program (grant numbers: JPMJFR206U) . We would like to thank the JSPS for providing the JSPS standard post-doctoral fellowship for research in Japan.		38	21	21	4	57	ELSEVIER SCIENCE SA	LAUSANNE	PO BOX 564, 1001 LAUSANNE, SWITZERLAND	1385-8947	1873-3212		CHEM ENG J	Chem. Eng. J.	MAR 1	2022	431		1
J	Alvarez, J; Kumagai, S; Wu, CF; Yoshioka, T; Bilbao, J; Olazar, M; Williams, PT				Alvarez, Jon; Kumagai, Shogo; Wu, Chunfei; Yoshioka, Toshiaki; Bilbao, Javier; Olazar, Martin; Williams, Paul T.			Hydrogen production from biomass and plastic mixtures by pyrolysis-gasification	INTERNATIONAL JOURNAL OF HYDROGEN ENERGY			English	Article						Hydrogen; Biomass; Waste; Plastic; Pyrolysis; Gasification	STEAM GASIFICATION; CO-PYROLYSIS; FLUIDIZED-BED; RICH GAS; CATALYSTS; PYROLYSIS/GASIFICATION; POLYETHYLENE; REACTOR; WASTES; SYNGAS	The addition of plastics to the steam pyrolysis/gasification of wood sawdust with and without a Ni/Al2O3 catalyst was investigated in order to increase the production of hydrogen in the gaseous stream. To study the influence of the biomass/plastic ratio in the initial feedstock, 5, 10 and 20 wt.% of polypropylene was introduced with the wood in the pyrolysis reactor. To investigate the effect of …	[Alvarez, Jon; Bilbao, Javier; Olazar, Martin] Univ Basque Country, Dept Chem Engn, E-48080 Bilbao, Spain; [Kumagai, Shogo; Yoshioka, Toshiaki] Tohoku Univ, Grad Sch Environm Studies, Aoba Ku, Sendai, Miyagi 9808579, Japan; [Kumagai, Shogo] Japan Soc Promot Sci, Chiyoda Ku, Tokyo 1028472, Japan; [Wu, Chunfei; Williams, Paul T.] Univ Leeds, Fac Engn, Energy Res Inst, Leeds LS2 9JT, W Yorkshire, En…	University of Basque Country; Tohoku University; Japan Society for the Promotion of Science; University of Leeds	Williams, PT (corresponding author), Univ Leeds, Fac Engn, Energy Res Inst, Leeds LS2 9JT, W Yorkshire, England.	yoshioka@env.che.tohoku.ac.jp; martin.olazar@ehu.es; p.t.williams@leeds.ac.uk	Kumagai, Shogo/AAU-5332-2020; Wu, Chunfei/G-1840-2018; Olazar, Martin/AAA-2334-2019; Alvarez, Jon/H-8939-2015; Williams, Paul/J-2902-2013	Wu, Chunfei/0000-0001-7961-1186; Yoshioka, Toshiaki/0000-0002-1982-550X; Kumagai, Shogo/0000-0002-5046-372X; Alvarez, Jon/0000-0002-8623-8073; Olazar, Martin/0000-0002-5740-727X; BILBAO ELORRIAGA, JAVIER/0000-0001-7084-9665; Williams, Paul/0000-0003-0401-9326	Basque Government [BFI2010-206]; Japan Society for the Promotion of Science (JSPS) [24-4996]; Ministry of Science and Education of the Spanish Government [CTQ2010-16133]	Basque Government(Basque Government); Japan Society for the Promotion of Science (JSPS)(Ministry of Education, Culture, Sports, Science and Technology, Japan (MEXT)Japan Society for the Promotion of Science); Ministry of Science and Education of the Spanish Government(Spanish Government)	Jon Alvarez thanks The Basque Government for his research training grant (BFI2010-206). This work was also partially supported by the Japan Society for the Promotion of Science (JSPS), Grant-in-Aid for JSPS Fellows, 24-4996, and the Ministry of Science and Education of the Spanish Government (Project CTQ2010-16133).		40	212	223	18	224	PERGAMON-ELSEVIER SCIENCE LTD	OXFORD	THE BOULEVARD, LANGFORD LANE, KIDLINGTON, OXFORD OX5 1GB, ENGLAND	0360-3199	1879-3487		INT J HYDROGEN ENERG	Int. J. Hydrog. Energy	JUL 15	2014	39	21
J	Berthold, EES; Deng, W; Zhou, JB; Bertrand, AME; Xu, J; Jiang, L; Su, S; Hu, S; Hu, X; Wang, Y; Xiang, J				Berthold, Engamba Esso Samy; Deng, Wei; Zhou, Junbo; Bertrand, Aguenkeu Mefinnya Elie; Xu, Jun; Jiang, Long; Su, Sheng; Hu, Song; Hu, Xun; Wang, Yi; Xiang, Jun			Impact of plastic type on synergistic effects during co-pyrolysis of rice husk and plastics	ENERGY			English	Article						Rice husk; Plastic; Co-pyrolysis; Synergistic effect	CATALYTIC PYROLYSIS; AROMATIC STRUCTURES; BIOMASS; POLYETHYLENE; CELLULOSE; EVOLUTION; PROGRESS; GAS	Pyrolysis of varied type of plastic waste generates distinct reaction intermediates, which affect their co-pyrolysis with biomass feedstock in different ways. This was investigated herein in co-pyrolysis of specific plastic types, including polypropylene (PP), polystyrene (PS), polyethylene terephthalate (PET), and polycarbonate (PC), as well as rice husk (RH) at 600-800 degrees C. The experiment…	[Berthold, Engamba Esso Samy; Deng, Wei; Xu, Jun; Jiang, Long; Su, Sheng; Hu, Song; Wang, Yi; Xiang, Jun] Huazhong Univ Sci & Technol, Sch Energy & Power Engn, State Key Lab Coal Combust, Wuhan 430074, Peoples R China; [Berthold, Engamba Esso Samy; Bertrand, Aguenkeu Mefinnya Elie] Minist Water & Energy, Dept Renewable Energy & Energy Management, POB 70, Yaounde, Cameroon; [Zhou, Junbo; Hu, Xun] …	Huazhong University of Science & Technology; Thermal Power Research Institute Co Ltd; University of Jinan	Xu, J; Wang, Y (corresponding author), Huazhong Univ Sci & Technol, Sch Energy & Power Engn, State Key Lab Coal Combust, Wuhan 430074, Peoples R China.	xujun_sklcc@hust.edu.cn; alenwang@hust.edu.cn	Wang, Yi/X-8066-2019; Xiang, Jun/C-5472-2016	Xiang, Jun/0000-0002-0627-1528	National Key R amp; D Program of China [2019YFB1503902]; National Natural Science Foundation of China (NSFC) [51976074, 51950410757]	National Key R amp; D Program of China; National Natural Science Foundation of China (NSFC)(National Natural Science Foundation of China (NSFC))	We acknowledge the National Key R & D Program of China (No. 2019YFB1503902) , the National Natural Science Foundation of China (NSFC) (No. 51976074, 51950410757) . The authors would also acknowledge the Analytical and Testing Center of Huazhong University of Science and Technology for the help on the experiments.		38	21	21	16	71	PERGAMON-ELSEVIER SCIENCE LTD	OXFORD	THE BOULEVARD, LANGFORD LANE, KIDLINGTON, OXFORD OX5 1GB, ENGLAND	0360-5442	1873-6785		ENERGY	Energy	OCT 15	2023	281
J	Xu, D; Yang, SY; Su, YH; Shi, L; Zhang, SP; Xiong, YQ				Xu, Dan; Yang, Siyuan; Su, Yinhai; Shi, Lei; Zhang, Shuping; Xiong, Yuanquan			Simultaneous production of aromatics-rich bio-oil and carbon nanomaterials from catalytic co-pyrolysis of biomass/plastic wastes and in-line catalytic upgrading of pyrolysis gas	WASTE MANAGEMENT			English	Article						Catalytic co-pyrolysis; Biomass; Plastic; Aromatics-rich bio-oil; Carbon nanotubes		An integrated process that includes catalytic co-pyrolysis of biomass/plastic wastes and in-line catalytic upgrading of pyrolysis gas were conducted to simultaneously produce aromatics-rich bio-oil and carbon nanotubes (CNTs). The influences of feedstocks blending ratio on the characteristics of bio-oil and CNTs were established. The reaction mechanism of carbon deposition during the system was a…	[Xu, Dan; Yang, Siyuan; Su, Yinhai; Shi, Lei; Zhang, Shuping; Xiong, Yuanquan] Southeast Univ, Sch Energy & Environm, Key Lab Energy Thermal Convers & Control, Minist Educ, Nanjing 210096, Peoples R China; [Zhang, Shuping] Nanjing Univ Sci & Technol, Sch Energy & Power Engn, Nanjing 210094, Peoples R China	Southeast University - China; Nanjing University of Science & Technology	Zhang, SP (corresponding author), Southeast Univ, Sch Energy & Environm, Key Lab Energy Thermal Convers & Control, Minist Educ, Nanjing 210096, Peoples R China.	zhangpeyton@163.com	yang, sy/AAO-8145-2020		National Natural Science Foundation of China [51906110]; National Key Research and Development Project of China [2019YFD1100602]; Natural Science Foundation of Jiangsu province, China [BK20190465]; China Postdoctoral Science Foundation [2019 M650097]; Scientific Research Foundation of Graduate School of Southeast University [YBPY1953]	National Natural Science Foundation of China(National Natural Science Foundation of China (NSFC)); National Key Research and Development Project of China(National Key Research & Development Program of China); Natural Science Foundation of Jiangsu province, China(Natural Science Foundation of Jiangsu Province); China Postdoctoral Science Foundation(China Postdoctoral Science Foundation); Scientifi…	The authors are grateful for financial supports provided by the National Natural Science Foundation of China (No. 51906110), the National Key Research and Development Project of China (No. 2019YFD1100602), the Natural Science Foundation of Jiangsu province, China (No. BK20190465), the China Postdoctoral Science Foundation (No. 2019 M650097) and the Scientific Research Foundation of Graduate Schoo…		40	0	0	11	128	PERGAMON-ELSEVIER SCIENCE LTD	OXFORD	THE BOULEVARD, LANGFORD LANE, KIDLINGTON, OXFORD OX5 1GB, ENGLAND	0956-053X	1879-2456		WASTE MANAGE	Waste Manage.	FEB 15	2021	121
J	Pan, RM; Zan, Y; Debenest, G				Pan, Ruming; Zan, Yue; Debenest, Gerald			Oil production from waste polyethylene and polystyrene co-pyrolysis: Interactions of temperature and carrier gas flow rate	JOURNAL OF ENVIRONMENTAL CHEMICAL ENGINEERING			English	Article						Waste plastic; Co-pyrolysis; Oil production; Artificial neural network; Genetic algorithm	PLASTIC WASTE; SLOW PYROLYSIS; BIOMASS; FUEL; OPTIMIZATION; DEGRADATION; KINETICS; MIXTURE; YIELDS	This study investigated the co-pyrolysis of waste polyethylene (WPE) and polystyrene (WPS) for oil production under different operating conditions (temperature and carrier gas flow rate). The ratio of the real-life WPE and WPS is different in different regions. Therefore, the interactions of operating conditions were investigated under different WPE/WPS mixture compositions. A hybrid model of art…	[Pan, Ruming; Debenest, Gerald] Univ Toulouse, Inst Mecan Fluides Toulouse IMFT, CNRS INPT UPS, F-31400 Toulouse, France; [Zan, Yue] Univ Toulouse, Lab Chim Coordinat, CNRS UPR8241, F-31077 Toulouse, France; [Zan, Yue] Univ Toulouse, UPS, F-31077 Toulouse, France	Universite de Toulouse; Universite Toulouse III - Paul Sabatier; Universite Federale Toulouse Midi-Pyrenees (ComUE); Institut National Polytechnique de Toulouse; Centre National de la Recherche Scientifique (CNRS); CNRS - Institute of Chemistry (INC); Universite Federale Toulouse Midi-Pyrenees (ComUE); Universite de Toulouse; Institut National Polytechnique de Toulouse; Universite de Toulouse; Un…	Pan, RM (corresponding author), Univ Toulouse, Inst Mecan Fluides Toulouse IMFT, CNRS INPT UPS, F-31400 Toulouse, France.	ruming.pan@toulouse-inp.fr	Pan, Ruming/GNM-7873-2022; Debenest, Gerald/AAA-3938-2021	Pan, Ruming/0000-0003-2146-4472	China Scholarship Council (CSC) program [201906120036]	China Scholarship Council (CSC) program(China Scholarship Council)	This work was supported by the China Scholarship Council (CSC) program (No. 201906120036).		59	13	13	3	26	ELSEVIER SCI LTD	OXFORD	THE BOULEVARD, LANGFORD LANE, KIDLINGTON, OXFORD OX5 1GB, OXON, ENGLAND	2213-2929	2213-3437		J ENVIRON CHEM ENG	J. Environ. Chem. Eng.	JUN	2022	10	3
J	Uzoejinwa, BB; He, XH; Wang, S; Abomohra, A; Hu, YM; He, ZX; Wang, Q				Uzoejinwa, Benjamin Bernard; He, Xiuhua; Wang, Shuang; Abomohra, Abd El-Fatah; Hu, Yamin; He, Zhixia; Wang, Qian			Co-pyrolysis of seaweeds with waste plastics: modeling and simulation of effects of co-pyrolysis parameters on yields, and optimization studies for maximum yield of enhanced biofuels	ENERGY SOURCES PART A-RECOVERY UTILIZATION AND ENVIRONMENTAL EFFECTS			English	Article						Co-pyrolysis; seaweed; plastic waste; optimal conditions; synergistic effect; enhanced biofuels	LAMINARIA-JAPONICA; BIO-OIL; BIOMASS; MACROALGAE; POLYETHYLENE; MECHANISMS; CONVERSION; MIXTURES; BEHAVIOR; PROGRESS	Co-pyrolysis of Enteromorpha prolifera (EP) (seaweeds) with waste plastics (high density polyethylene (HDPE)) for maximum yield of enhanced biofuels has been investigated. Main and interaction effects of three effective co-pyrolysis parameters (pyrolysis temperature, feedstock blending ratio and heating rate) on bio-oil, char and gas yields were also modeled and simulated, respectively. Optimizat…	[Uzoejinwa, Benjamin Bernard; He, Xiuhua; Wang, Shuang; Abomohra, Abd El-Fatah; Hu, Yamin; He, Zhixia; Wang, Qian] Jiangsu Univ, Sch Energy & Power Engn, Zhenjiang, Jiangsu, Peoples R China; [Uzoejinwa, Benjamin Bernard] Univ Nigeria, Dept Agr & Bioresources Engn, Nsukka, Nigeria; [Abomohra, Abd El-Fatah] Tanta Univ, Bot Dept, Fac Sci, Tanta, Egypt	Jiangsu University; University of Nigeria; Egyptian Knowledge Bank (EKB); Tanta University	He, XH; Wang, S (corresponding author), Jiangsu Univ, Sch Energy & Power Engn, Zhenjiang, Jiangsu, Peoples R China.	xiuhua.he@ujs.edu.cn; alexjuven@ujs.edu.cn	Hu, Yamin/LFU-2544-2024; Abomohra, Abdelfatah/J-1006-2016	Abomohra, Abdelfatah/0000-0003-2784-3297	National Natural Science Funds Fund of China [51676091]; China Postdoctoral Science Foundation [2018M630529]; Jiangsu Province '333' Project (2018); Six Talent Peaks Project in Jiangsu Province (2018); National Natural Science Foundation of China [51676091]	National Natural Science Funds Fund of China; China Postdoctoral Science Foundation(China Postdoctoral Science Foundation); Jiangsu Province '333' Project (2018); Six Talent Peaks Project in Jiangsu Province (2018); National Natural Science Foundation of China(National Natural Science Foundation of China (NSFC))	This work was supported by the National Natural Science Funds Fund of China (No. 51676091), the China Postdoctoral Science Foundation (No. 2018M630529), the Jiangsu Province '333' Project (2018), and the Six Talent Peaks Project in Jiangsu Province (2018); National Natural Science Foundation of China [51676091].		54	26	26	7	74	TAYLOR & FRANCIS INC	PHILADELPHIA	530 WALNUT STREET, STE 850, PHILADELPHIA, PA 19106 USA	1556-7036	1556-7230		ENERG SOURCE PART A	Energy Sources Part A-Recovery Util. Environ. Eff.	APR 17	2020	42	8
J	Chen, RJ; Zhang, SY; Cong, KL; Li, QH; Zhang, YG				Chen, Rongjie; Zhang, Shiyu; Cong, Kunlin; Li, Qinghai; Zhang, Yanguo			Insight into synergistic effects of biomass-polypropylene co-pyrolysis using representative biomass constituents	BIORESOURCE TECHNOLOGY			English	Article						Biomass; Model components; PolypropyleneCo-pyrolysis; Synergistic effect; Kinetics	MUNICIPAL SOLID-WASTE; THERMOGRAVIMETRIC CHARACTERISTICS; LIGNOCELLULOSIC BIOMASS; WOOD BIOMASS; KINETICS; MICROALGAE; POLYMERS; BEHAVIORS; BLENDS; TRANSFORMATION	The co-pyrolysis behavior of plastic (PP) with six biomass components (cellulose, hemicellulose, lignin, carbohydrate, lipid, protein) was studied by thermogravimetry. The overlap ratio (OR) and the difference in experimental and theoretical weight loss (Delta W) are defined. The results demonstrated that the interaction of lignin and PP was notable with the OR of 0.9661. From ?W, it was found th…	[Chen, Rongjie; Zhang, Shiyu; Cong, Kunlin; Li, Qinghai; Zhang, Yanguo] Tsinghua Univ, Tsinghua Univ Univ Waterloo Joint Res Ctr Micro N, Beijing Key Lab CO2 Utilizat & Reduct Technol, Minist Educ,Dept Energy & Power Engn,Key Lab Ther, Beijing 100084, Peoples R China; [Zhang, Shiyu] Harbin Inst Technol, Sch Energy Sci & Engn, Harbin 150001, Heilongjiang, Peoples R China	Tsinghua University; Harbin Institute of Technology	Li, QH; Zhang, YG (corresponding author), Tsinghua Univ, Tsinghua Univ Univ Waterloo Joint Res Ctr Micro N, Beijing Key Lab CO2 Utilizat & Reduct Technol, Minist Educ,Dept Energy & Power Engn,Key Lab Ther, Beijing 100084, Peoples R China.	liqh@tsinghua.edu.cn; zhangyg@tsinghua.edu.cn			National Key RAMP;D Program of China [2017YFB0603601]	National Key RAMP;D Program of China	This work was supported by National Key R&D Program of China [grant numbers 2017YFB0603601].		49	77	82	14	192	ELSEVIER SCI LTD	OXFORD	THE BOULEVARD, LANGFORD LANE, KIDLINGTON, OXFORD OX5 1GB, OXON, ENGLAND	0960-8524	1873-2976		BIORESOURCE TECHNOL	Bioresour. Technol.	JUL	2020	307
J	Likun, PKW; Zhang, HY; Fan, YY				Likun, Peter Keliona Wani; Zhang, Huiyan; Fan, Yuyang			Improving hydrocarbons production via catalytic co-pyrolysis of torrefied-biomass with plastics and dual catalytic pyrolysis	CHINESE JOURNAL OF CHEMICAL ENGINEERING			English	Article						Torrefaction; Biomass; Plastics; Co-Pyrolysis; Dual-catalyst; Aromatics; Selectivity	OF-THE-ART; BIO-OIL; AROMATIC-HYDROCARBONS; FOOD WASTE; PINE WOOD; POLYETHYLENE; TORREFACTION; FUEL; BED; HEMICELLULOSE	To increase the low yield and selectivity of aromatic hydrocarbons during the biomass pyrolysis process, we torrefied the biomass and then co-pyrolyzing with plastics such as high-density polyethylene (HOPE). polystyrene (PS), ethylene-vinyl acetate (EVA) and polypropylene (PP) and also single and dual catalyst layouts were investigated by Py-GC/MS. The results showed that non-catalytic fast pyro…	[Likun, Peter Keliona Wani; Zhang, Huiyan; Fan, Yuyang] Southeast Univ, Key Lab Thermal Energy Convers & Control, Minist Educ, Nanjing 210096, Peoples R China; [Likun, Peter Keliona Wani] Juba Univ, Dept Mech Engn, POB 82, Juba, Sudan	Southeast University - China	Zhang, HY (corresponding author), Southeast Univ, Key Lab Thermal Energy Convers & Control, Minist Educ, Nanjing 210096, Peoples R China.	hyzhang@seu.edu.cn	Zhang, Huiyan/A-8640-2011		National Natural Science Foundation for Excellent Young Scholar of China [51822604]; Nature Science Foundation of Jiangsu Province for Distinguished Young Scholar [BK20180014]	National Natural Science Foundation for Excellent Young Scholar of China; Nature Science Foundation of Jiangsu Province for Distinguished Young Scholar	This work was supported by the National Natural Science Foundation for Excellent Young Scholar of China (51822604) and the Nature Science Foundation of Jiangsu Province for Distinguished Young Scholar (BK20180014).		51	7	8	7	80	CHEMICAL INDUSTRY PRESS CO LTD	BEIJING	NO 13, QINGNIANHU SOUTH ST, DONGCHENG DIST, BEIJING 100011, PEOPLES R CHINA	1004-9541	2210-321X		CHINESE J CHEM ENG	Chin. J. Chem. Eng.	FEB	2022	42
J	Rex, P; Ganesan, V; Sivashankar, V; Tajudeen, S				Rex, P.; Ganesan, V; Sivashankar, V; Tajudeen, S.			Prospective review for development of sustainable catalyst and absorbents from biomass and application on plastic waste pyrolysis	INTERNATIONAL JOURNAL OF ENVIRONMENTAL SCIENCE AND TECHNOLOGY			English	Review						Pyrolysis; Catalyst; Microwave; Biomass; Acid sites; Activated carbon	MICROWAVE-ASSISTED PYROLYSIS; CO-PYROLYSIS; BIO-OIL; SYNTHETIC-POLYMERS; POLYSTYRENE; POLYPROPYLENE; POLYETHYLENE; FUEL; CONVERSION; QUALITY	There is a huge rise in the demand of plastics; as a result, plastic waste gets accumulated by improper disposal methods and degrades the living environment. Despite recycling of plastic waste, majority of it ends up in landfills, disposed in oceans and rivers. More researches are looking at better solution and development of integrated plan to handle plastic waste. The current review aims to det…	[Rex, P.; Ganesan, V; Sivashankar, V; Tajudeen, S.] Saveetha Inst Tech & Med Sci, Inst Agr Engn, Saveetha Sch Engn, Chennai 602105, Tamil Nadu, India	Saveetha Institute of Medical & Technical Science; Saveetha School of Engineering	Rex, P (corresponding author), Saveetha Inst Tech & Med Sci, Inst Agr Engn, Saveetha Sch Engn, Chennai 602105, Tamil Nadu, India.	prathireeta@gmail.com	R, Dr Prathiba/AAA-6395-2021; Shankar, Siva/AHE-5793-2022; G, Velmurugan/AEG-1866-2022	Shankar, Siva/0000-0003-3552-5408; G, Velmurugan/0000-0001-7324-280X; Rex, Prathiba/0000-0001-8783-972X	University Grants Commission, India [F1-17.1/2015-16/MANF-2015-17-TAM-58352/SA-III]	University Grants Commission, India(University Grants Commission, India)	The authors would like to thank University Grants Commission, India, for funding this research work under Maulana Azad National Fellowship scheme (F1-17.1/2015-16/MANF-2015-17-TAM-58352/SA-III) and Saveetha School of Engineering, India.		97	11	11	6	58	SPRINGER	NEW YORK	ONE NEW YORK PLAZA, SUITE 4600, NEW YORK, NY, UNITED STATES	1735-1472	1735-2630		INT J ENVIRON SCI TE	Int. J. Environ. Sci. Technol.	JUL	2023	20	7
J	Hou, JY; Zhong, DX; Liu, WX				Hou, Jinyu; Zhong, Daoxu; Liu, Wuxing			Catalytic co-pyrolysis of oil sludge and biomass over ZSM-5 for production of aromatic platform chemicals	CHEMOSPHERE			English	Article						Oil sludge; Waste biomass; Co-pyrolysis; ZSM-5; Aromatic hydrocarbons	WASTE PLASTICS; HYDROCARBONS; MECHANISM; ZEOLITES; METHANOL; PROGRESS; BAMBOO; TIRE	Hazardous oil sludge (OS) poses a great challenge to the environment, whereas conventional treatment methods (i.e., incineration or pyrolysis-incineration) are relatively less value-added and will bring about air pollution problems. To realize the high-value utilization of OS, catalytic co-pyrolysis with waste biomass to produce platform chemicals was studied using TG-FTIR and Py (pyrolyzer)-GC/M…	[Hou, Jinyu; Liu, Wuxing] Chinese Acad Sci, Inst Soil Sci, Key Lab Soil Environm & Pollut Remediat, Nanjing 210008, Peoples R China; [Zhong, Daoxu] Jiangsu Prov Acad Environm Sci, Nanjing 210036, Jiangsu, Peoples R China	Chinese Academy of Sciences; Nanjing Institute of Soil Science, CAS	Liu, WX (corresponding author), Chinese Acad Sci, Inst Soil Sci, Key Lab Soil Environm & Pollut Remediat, Nanjing 210008, Peoples R China.	liuwuxin@issas.ac.cn	Zhong, Daoxu/HOC-3671-2023	Zhong, Daoxu/0009-0007-3900-7575	National Natural Science Foundation of China [42007134]; Natural Science Foundation of Jiangsu Province [BK20191501]	National Natural Science Foundation of China(National Natural Science Foundation of China (NSFC)); Natural Science Foundation of Jiangsu Province(Natural Science Foundation of Jiangsu Province)	The authors thank the National Natural Science Foundation of China (42007134) and the Natural Science Foundation of Jiangsu Province (Grant No. BK20191501) for funding this research project.		41	21	22	11	88	PERGAMON-ELSEVIER SCIENCE LTD	OXFORD	THE BOULEVARD, LANGFORD LANE, KIDLINGTON, OXFORD OX5 1GB, ENGLAND	0045-6535	1879-1298		CHEMOSPHERE	Chemosphere	MAR	2022	291		3
J	Cisse, I; Hernandez-Charpak, YD; Diaz, CA; Trabold, TA				Cisse, Ibrahim; Hernandez-Charpak, Yvan D.; Diaz, Carlos A.; Trabold, Thomas A.			Biochar Derived from Pyrolysis of Common Agricultural Waste Feedstocks and Co-pyrolysis with Low-Density Polyethylene Mulch Film	WASTE AND BIOMASS VALORIZATION			English	Article						Pyrolysis; Biochar; Agricultural mulch film; Low-density polyethylene	FTIR SPECTROSCOPY; BIOMASS; TEREPHTHALATE; PRODUCTS; CHAR; WOOD	Purpose Agricultural wastes are generated globally in large quantities, and can be converted into value-added products. Agricultural mulch films (AMFs) are also used to control soil moisture and weed growth, but present challenges because waste management is generally limited to landfilling and incineration. Pyrolysis offers more sustainable pathways by transforming mixed agricultural wastes into…	[Cisse, Ibrahim; Hernandez-Charpak, Yvan D.; Trabold, Thomas A.] Rochester Inst Technol, Golisano Inst Sustainabil, Rochester, NY 14623 USA; [Diaz, Carlos A.] Rochester Inst Technol, Dept Packaging Sci, Rochester, NY 14623 USA	Rochester Institute of Technology; Rochester Institute of Technology	Trabold, TA (corresponding author), Rochester Inst Technol, Golisano Inst Sustainabil, Rochester, NY 14623 USA.	tatasp@rit.edu	Trabold, Thomas/A-9808-2009; Hernandez-Charpak, Yvan/JLN-0529-2023	Hernandez Charpak, Yvan David/0009-0000-8539-0156; Diaz, Carlos A/0000-0003-1763-2146; Trabold, Thomas/0000-0001-5334-2918	Foundation for Food and Agriculture Research (FFAR) [CA19-SS-0000000013]; Helen and Ritter Shumway Endowed Scholarship	Foundation for Food and Agriculture Research (FFAR); Helen and Ritter Shumway Endowed Scholarship	The authors thank the Foundation for Food and Agriculture Research (FFAR) for supporting the research project Degradable mulching films for sustainable agriculture that provided Graduate Research Assistantships for I. Cisse and Y.D. Hernandez-Charpak through Grant #CA19-SS-0000000013. We are also grateful to the Golisano Institute for Sustainability at Rochester Institute of Technology for partia…		41	15	15	8	68	SPRINGER	DORDRECHT	VAN GODEWIJCKSTRAAT 30, 3311 GZ DORDRECHT, NETHERLANDS	1877-2641	1877-265X		WASTE BIOMASS VALORI	Waste Biomass Valorization	SEP	2022	13	9
J	Han, J; Yao, X; Zhan, YQ; Oh, SY; Kim, LH; Kim, HJ				Han, Jun; Yao, Xi; Zhan, Yiqiu; Oh, Song-Yul; Kim, Lae-Hyun; Kim, Hee-Joon			A method for estimating higher heating value of biomass-plastic fuel	JOURNAL OF THE ENERGY INSTITUTE			English	Article						Higher heating value (HHV); Biomass-plastics fuel; Estimating method of HHV	MUNICIPAL SOLID-WASTE; CO-PYROLYSIS; PART I; PREDICTION; PARAMETERS; MODELS	In this study, a new method for estimating the higher heating value (HHV) of biomass-plastic mixture fuel and municipal solid waste (MSW) was developed, which was based on carbon, hydrogen and oxygen content of fuel obtained by ultimate analysis. Meanwhile, the validity of the estimated HHV was proven by the comparison with the HHV measured by an auto calorimeter. After comparing with other model…	[Han, Jun; Yao, Xi; Zhan, Yiqiu] Wuhan Univ Sci & Technol, Coll Resources & Environm Engn, Wuhan 430081, Hunan, Peoples R China; [Oh, Song-Yul; Kim, Lae-Hyun] Seoul Natl Univ Sci & Technol, Grad Sch Energy & Environm, 172,Gongneung 2 Dong, Seoul 139743, South Korea; [Kim, Hee-Joon] Niigata Univ, Dept Chem & Chem Engn, 2-8050,lkarashi, Niigata 9502181, Japan	Wuhan University of Science & Technology; Seoul National University of Science & Technology; Niigata University	Kim, HJ (corresponding author), Niigata Univ, Dept Chem & Chem Engn, 2-8050,lkarashi, Niigata 9502181, Japan.	kim@eng.niigata-u.ac.jp	han, jun/P-9037-2015		Natural Science Foundation of Hubei Province [2014CFA030]	Natural Science Foundation of Hubei Province(Natural Science Foundation of Hubei Province)	This work was partly supported by Natural Science Foundation of Hubei Province (2014CFA030).		26	44	51	4	45	ELSEVIER SCI LTD	OXFORD	THE BOULEVARD, LANGFORD LANE, KIDLINGTON, OXFORD OX5 1GB, OXON, ENGLAND	1743-9671	1746-0220		J ENERGY INST	J. Energy Inst.	APR	2017	90	2
J	Suriapparao, DV; Yerrayya, A; Nagababu, G; Guduru, RK; Kumar, TH				Suriapparao, Dadi V.; Yerrayya, Attada; Nagababu, Garlapati; Guduru, Ramesh K.; Kumar, Tanneru Hemanth			Recovery of renewable aromatic and aliphatic hydrocarbon resources from microwave pyrolysis/co-pyrolysis of agro-residues and plastics wastes	BIORESOURCE TECHNOLOGY			English	Article						Wheat straw; Rice husk; Expanded polystyrene; Waste polypropylene; Microwave co-pyrolysis	ASSISTED CO-PYROLYSIS; BIO-OIL PRODUCTION; THERMOGRAVIMETRIC ANALYSIS; LIGNOCELLULOSIC BIOMASS; CHLORELLA-VULGARIS; SEWAGE-SLUDGE; WHEAT-STRAW; CATALYST; POLYSTYRENE; KINETICS	The present study focussed on recovering the valuable carbon resources from agro-residues (wheat straw, rice husk) and waste plastics (polypropylene, polystyrene) using microwave pyrolysis and co-pyrolysis. The main objective of this study is to investigate the effect of the susceptor blending mechanism on the co-pyrolysis product distribution. Graphite was mixed with feedstock in a new approach …	[Suriapparao, Dadi V.] PanditDeendayal Petr Univ, Dept Chem Engn, Gandhinagar 382007, India; [Yerrayya, Attada] King Abdullah Univ Sci & Technol, KAUST Catalysis Ctr KCC, Thuwal 239556900, Saudi Arabia; [Nagababu, Garlapati; Guduru, Ramesh K.] PanditDeendayal Petr Univ, Dept Mech Engn, Gandhinagar 382007, India; [Kumar, Tanneru Hemanth] Indian Inst Petr Energy, Dept Chem Engn, Visakhapatnam 53000…	Pandit Deendayal Energy University; King Abdullah University of Science & Technology; Pandit Deendayal Energy University	Suriapparao, DV (corresponding author), PanditDeendayal Petr Univ, Dept Chem Engn, Gandhinagar 382007, India.	suryadadi165@gmail.com	GUDURU, RAMESH/N-8541-2016; Tanneru, Hemanth Kumar/AAW-3277-2021; YERRAYYA, ATTADA/AAC-2900-2021; Tanneru, Hemanth Kumar/F-5624-2012; GARLAPATI, NAGABABU/C-7383-2019	Tanneru, Hemanth Kumar/0000-0002-3385-7030; YERRAYYA, ATTADA/0000-0001-6788-5059; GARLAPATI, NAGABABU/0000-0003-3718-271X					41	58	58	9	126	ELSEVIER SCI LTD	OXFORD	THE BOULEVARD, LANGFORD LANE, KIDLINGTON, OXFORD OX5 1GB, OXON, ENGLAND	0960-8524	1873-2976		BIORESOURCE TECHNOL	Bioresour. Technol.	DEC	2020	318
J	Ghorbannezhad, P; Park, S; Onwudili, JA				Ghorbannezhad, Payam; Park, Sunkyu; Onwudili, Jude A.			Co-pyrolysis of biomass and plastic waste over zeolite- and sodium-based catalysts for enhanced yields of hydrocarbon products	WASTE MANAGEMENT			English	Article						Sugarcane bagasse pith; Polyethylene terephthalate (PET); Co-pyrolysis; HZSM-5/Na2CO3/gamma-Al2O3 catalysts; Hydrocarbons	LIGNOCELLULOSIC BIOMASS; AROMATIC-HYDROCARBONS; MODIFIED HZSM-5; ZSM-5 ZEOLITES; CONVERSION; WOOD; POLYETHYLENE; MIXTURES; HYDRODEOXYGENATION; TECHNOLOGY	Ex-situ co-pyrolysis of sugarcane bagasse pith and polyethylene terephthalate (PET) was investigated over zeolite-based catalysts using a tandem micro-reactor at an optimised temperature of 700 degrees C. A combination of zeolite (HZSM-5) and sodium carbonate/gamma-alumina served as effective catalysts for 18% more oxygen removal than HZSM-5 alone. The combined catalysts led to improved yields of…	[Ghorbannezhad, Payam] Shahid Beheshti Univ, Fac New Technol & Energy Engn, Dept Biorefinery Engn, Zirab Campus, Mazandaran, Iran; [Park, Sunkyu] NC State Univ, Coll Nat Resources, Dept Forest Biomat, Raleigh, NC 27695 USA; [Onwudili, Jude A.] Aston Univ, European Bioenergy Res Inst, Chem Engn & Appl Chem, Birmingham B4 7ET, W Midlands, England	North Carolina State University; Aston University	Ghorbannezhad, P (corresponding author), Shahid Beheshti Univ, Fac New Technol & Energy Engn, Dept Biorefinery Engn, Zirab Campus, Mazandaran, Iran.;Onwudili, JA (corresponding author), Aston Univ, European Bioenergy Res Inst, Chem Engn & Appl Chem, Birmingham B4 7ET, W Midlands, England.	p_ghorbannezhad@sbu.ac.ir; j.onwudili@aston.ac.uk		Ghorbannezhad, Payam/0000-0002-6146-8964; Park, Sunkyu/0000-0002-9332-9061; Onwudili, Jude/0000-0002-5355-9970	ENgineering and TEchnology Institute Groningen (ENTEG); Department of Chemical Engineering [190138720]; Department of Biorefinery Engineering at Shahid Beheshti University, Iran [397081]	ENgineering and TEchnology Institute Groningen (ENTEG); Department of Chemical Engineering; Department of Biorefinery Engineering at Shahid Beheshti University, Iran	This study was supported partially by the ENgineering and TEchnology Institute Groningen (ENTEG) and Department of Chemical Engineering (award number: 190138720) and Department of Biorefinery Engineering at Shahid Beheshti University, Iran (award number: 397081). The research was funded by departmental grants to Dr Ghorbannezhad.		53	95	105	10	130	PERGAMON-ELSEVIER SCIENCE LTD	OXFORD	THE BOULEVARD, LANGFORD LANE, KIDLINGTON, OXFORD OX5 1GB, ENGLAND	0956-053X	1879-2456		WASTE MANAGE	Waste Manage.	FEB 1	2020	102
J	Zhang, YR; Li, JF; Li, BL; Li, ZS; He, Y; Qin, ZH; Gao, RY				Zhang, Yiran; Li, Jianfen; Li, Bolin; Li, Zeshan; He, Yun; Qin, Zhenhua; Gao, Rongyi			Preparation of Ni-La/Al2O3-CeO2-Bamboo Charcoal Catalyst and Its Application in Co-pyrolysis of Straw and Plastic for Hydrogen Production	BIOENERGY RESEARCH			English	Article						Composite support; Co-pyrolysis; Catalyst; Hydrogen yield; Catalytic performance	H-2-RICH SYNGAS PRODUCTION; STEAM GASIFICATION; CARBON-DIOXIDE; BIOMASS; BAMBOO; WASTE; CONVERSION; POLYETHYLENE; HYDROCARBONS; PERFORMANCE	The conversion of biomass and plastic into hydrogen through catalytic pyrolysis is a promising technology for the production of clean fuels. The developed Ni-La/Al2O3-CeO2-Bamboo charcoal (ACB) catalyst was applied to the co-pyrolysis of straw and polyethylene (PE) to produce hydrogen. This research explored the optimal mixing ratio of straw and PE, and the influence of the presence and stability…	[Zhang, Yiran; Li, Jianfen; Li, Bolin; Li, Zeshan; He, Yun; Qin, Zhenhua; Gao, Rongyi] Wuhan Polytech Univ, Sch Chem & Environm Engn, Wuhan 430023, Peoples R China	Wuhan Polytechnic University	Li, JF (corresponding author), Wuhan Polytech Univ, Sch Chem & Environm Engn, Wuhan 430023, Peoples R China.	whpulijfen@126.com		He, Yun/0000-0003-2141-0028	building project of Hubei Province for the technology innovation and entrepreneurship service capacity [2018BEC466]; Central Committee Guides Local Science and Technology Development Special Project of Hubei Province [2018ZYYD062, 2019ZYYD059]; Natural Science Foundation of Hubei Province [2020CFB405]; Research and Innovation Initiatives of WHPU [2020J05]	building project of Hubei Province for the technology innovation and entrepreneurship service capacity; Central Committee Guides Local Science and Technology Development Special Project of Hubei Province; Natural Science Foundation of Hubei Province(Natural Science Foundation of Hubei Province); Research and Innovation Initiatives of WHPU	This work was supported by the building project of Hubei Province for the technology innovation and entrepreneurship service capacity (No. 2018BEC466); the Central Committee Guides Local Science and Technology Development Special Project of Hubei Province (No. 2018ZYYD062, No. 2019ZYYD059); Natural Science Foundation of Hubei Province (NO.2020CFB405); and Research and Innovation Initiatives of WH…		66	9	10	8	76	SPRINGER	NEW YORK	ONE NEW YORK PLAZA, SUITE 4600, NEW YORK, NY, UNITED STATES	1939-1234	1939-1242		BIOENERG RES	BioEnergy Res.	SEP	2022	15	3
J	Mahari, WAW; Awang, S; Zahariman, NAZ; Peng, WX; Man, M; Park, YK; Lee, J; Sonne, C; Lam, SS				Mahari, Wan Adibah Wan; Awang, Syafikah; Zahariman, Nur Alifah Zakirah; Peng, Wanxi; Man, Mustafa; Park, Young-Kwon; Lee, Jechan; Sonne, Christian; Lam, Su Shiung			Microwave co-pyrolysis for simultaneous disposal of environmentally hazardous hospital plastic waste, lignocellulosic, and triglyceride biowaste	JOURNAL OF HAZARDOUS MATERIALS			English	Article						Fuel; Hospital waste; Lignocellulose; Polymer; Triglycerides	LOW-DENSITY POLYETHYLENE; BIO-OIL; HYDROTHERMAL CARBONIZATION; ACID; HYDROCARBONS; CATALYSTS; RECOVERY; BIOMASS; FUEL	Microwave co-pyrolysis was examined as an approach for simultaneous reduction and treatment of environmentally hazardous hospital plastic waste (HPW), lignocellulosic (palm kernel shell, PKS) and triglycerides (waste vegetable oil, WVO) biowaste as co-feedstock. The co-pyrolysis demonstrated faster heating rate (16-43 degrees C/min) compared to microwave pyrolysis of single feedstock (9-17 degree…	[Mahari, Wan Adibah Wan; Peng, Wanxi; Lam, Su Shiung] Henan Agr Univ, Henan Prov Engn Res Ctr Biomass Value Added Prod, Zhengzhou 450002, Henan, Peoples R China; [Mahari, Wan Adibah Wan; Lam, Su Shiung] Univ Malaysia Terengganu, Higher Inst Ctr Excellence HICoE, Inst Trop Aquaculture & Fisheries, Pyrolysis Technol Res Grp, Terengganu 21030, Malaysia; [Awang, Syafikah; Zahariman, Nur Alifah Zakira…	Henan Agricultural University; Universiti Malaysia Terengganu; Universiti Malaysia Terengganu; University of Seoul; Ajou University; Ajou University; Aarhus University	Peng, WX; Lam, SS (corresponding author), Henan Agr Univ, Henan Prov Engn Res Ctr Biomass Value Added Prod, Zhengzhou 450002, Henan, Peoples R China.	pengwanxi@163.com; lam@umt.edu.my	Wang, Zhibo/GSD-3371-2022; Lam, Su Shiung/K-7436-2012; Wan Mahari, Wan Adibah/U-8502-2019; Man, Mustafa/GNW-6578-2022; Sonne, Christian/I-7532-2013; Lee, Jechan/J-1229-2016	Sonne, Christian/0000-0001-5723-5263; Wan Mahari, Wan Adibah/0000-0002-0183-9778; Lee, Jechan/0000-0002-9759-361X	Education University of Hong Kong [53376]; HICOE Research Grant Scheme under HICoE AKUATROP Trust [UMT/CRIM/2-2/5 Jilid 2 (10), 56051, 66955]; Program for Innovative Research Team (in Science and Technology) in University of Henan Province [21IRTSTHN020]; Central Plain Scholar Funding Project of Henan Province [212101510005]; Henan Agricultural University; Universiti Malaysia Terengganu	Education University of Hong Kong; HICOE Research Grant Scheme under HICoE AKUATROP Trust; Program for Innovative Research Team (in Science and Technology) in University of Henan Province; Central Plain Scholar Funding Project of Henan Province; Henan Agricultural University; Universiti Malaysia Terengganu	The authors would like to thank The Education University of Hong Kong under International Grant (Vot 53376) and HICOE Research Grant Scheme (UMT/CRIM/2-2/5 Jilid 2 (10), Vot 56051) under HICoE AKUATROP Trust Account No. 66955 to perform this project. The work is also supported by Program for Innovative Research Team (in Science and Technology) in University of Henan Province (No. 21IRTSTHN020) an…		63	50	51	6	97	ELSEVIER	AMSTERDAM	RADARWEG 29, 1043 NX AMSTERDAM, NETHERLANDS	0304-3894	1873-3336		J HAZARD MATER	J. Hazard. Mater.	FEB 5	2022	423		A
J	Xu, D; Xiong, YQ; Zhang, SP; Su, YH				Xu, Dan; Xiong, Yuanquan; Zhang, Shuping; Su, Yinhai			The synergistic mechanism between coke depositions and gas for H2 production from co-pyrolysis of biomass and plastic wastes via char supported catalyst	WASTE MANAGEMENT			English	Article						Co-pyrolysis; Biomass; Plastic; Coke; Gas; Synergistic mechanism		Co-pyrolysis of biomass and polyethylene(PE) wastes with different blending ratios were performed in a bench-scale fixed bed over Ni/char catalyst. The synergistic mechanism between coke depositions and gas products during co-pyrolysis was studied for better regulation of H-2 production. The results showed that feedstock blending ratio played a decisive role in competitive growth of amorphous cok…	[Xu, Dan; Xiong, Yuanquan; Zhang, Shuping; Su, Yinhai] Southeast Univ, Sch Energy & Environm, Key Lab Energy Thermal Convers & Control, Minist Educ, Nanjing 210096, Peoples R China; [Zhang, Shuping] Nanjing Univ Sci & Technol, Sch Energy & Power Engn, Nanjing 210094, Peoples R China	Southeast University - China; Nanjing University of Science & Technology	Xiong, YQ; Zhang, SP (corresponding author), Southeast Univ, Sch Energy & Environm, Key Lab Energy Thermal Convers & Control, Minist Educ, Nanjing 210096, Peoples R China.	yqxiong@seu.edu.cn; zhangsp@njust.edu.cn			National Natural Science Foundation of China [51906110]; National Key Research and Development Project of China [2019YFD1100602]; Natural Science Foundation of Jiangsu province, China [BK20190465]; China Postdoctoral Science Foundation [2019M650097]; Scientific Research Foundation of Graduate School of Southeast University [YBPY1953]	National Natural Science Foundation of China(National Natural Science Foundation of China (NSFC)); National Key Research and Development Project of China(National Key Research & Development Program of China); Natural Science Foundation of Jiangsu province, China(Natural Science Foundation of Jiangsu Province); China Postdoctoral Science Foundation(China Postdoctoral Science Foundation); Scientifi…	The authors are grateful for financial supports provided by the National Natural Science Foundation of China (No. 51906110), the National Key Research and Development Project of China (No. 2019YFD1100602), the Natural Science Foundation of Jiangsu province, China (No. BK20190465), the China Postdoctoral Science Foundation (No. 2019M650097) and the Scientific Research Foundation of Graduate School…		42	0	0	8	62	PERGAMON-ELSEVIER SCIENCE LTD	OXFORD	THE BOULEVARD, LANGFORD LANE, KIDLINGTON, OXFORD OX5 1GB, ENGLAND	0956-053X	1879-2456		WASTE MANAGE	Waste Manage.	FEB 15	2021	121
J	Fan, HG; Gu, J; Hu, SQ; Yuan, HR; Chen, Y				Fan, Honggang; Gu, Jing; Hu, Shuangqing; Yuan, Haoran; Chen, Yong			Co-pyrolysis and co-gasification of biomass and polyethylene: Thermal behaviors, volatile products and characteristics of their residues	JOURNAL OF THE ENERGY INSTITUTE			English	Article						Biomass; PE; Co-pyrolysis; Co-gasification; Residue	HIGH-DENSITY POLYETHYLENE; TG-FTIR; WASTE; PLASTICS; OIL; CONVERSION; CELLULOSE; BAMBOO; FUELS; ASH	Co-pyrolysis and co-gasification of biomass and plastics could be a promising method to alleviate environmental pollution and provide renewable energy. In this paper, co-pyrolysis and co-gasification of eucalyptus wood (EW) or rice straw (RS) with polyethylene (PE) were investigated by a thermogravimetric analyzer coupled with a Fourier transform infrared spectrometer (TG-FTIR) and a scanning ele…	[Fan, Honggang; Gu, Jing; Hu, Shuangqing; Yuan, Haoran; Chen, Yong] Chinese Acad Sci, Guangzhou Inst Energy Convers, Guangzhou 510640, Guangdong, Peoples R China; [Fan, Honggang; Gu, Jing; Hu, Shuangqing; Yuan, Haoran; Chen, Yong] Chinese Acad Sci, Key Lab Renewable Energy, Guangzhou 510640, Guangdong, Peoples R China; [Fan, Honggang; Gu, Jing; Hu, Shuangqing; Yuan, Haoran; Chen, Yong] Guangdong …	Chinese Academy of Sciences; Guangzhou Institute of Energy Conversion, CAS; Chinese Academy of Sciences; Guangdong University of Technology	Yuan, HR (corresponding author), Chinese Acad Sci, Guangzhou Inst Energy Convers, Guangzhou 510640, Guangdong, Peoples R China.	yuanhr@ms.giec.ac.cn	fan, honggang/HGA-6585-2022		National Natural Science Foundation of China [51606202]; Outstanding Youth Fund of Academician Workstation, Guangdong Science -Technology Project [2017A010104021, 20176040404011, 2017B040404009]; Biomass Energy and Materials Key Laboratory Open Fund of Jiangsu Province [JSBEM201609]	National Natural Science Foundation of China(National Natural Science Foundation of China (NSFC)); Outstanding Youth Fund of Academician Workstation, Guangdong Science -Technology Project; Biomass Energy and Materials Key Laboratory Open Fund of Jiangsu Province	The authors gratefully acknowledge financial support from the National Natural Science Foundation of China (51606202), Outstanding Youth Fund of Academician Workstation, Guangdong Science -Technology Project (2017A010104021, 20176040404011 and 2017B040404009), and the Biomass Energy and Materials Key Laboratory Open Fund of Jiangsu Province (JSBEM201609).		33	45	47	10	131	ELSEVIER SCI LTD	OXFORD	THE BOULEVARD, LANGFORD LANE, KIDLINGTON, OXFORD OX5 1GB, OXON, ENGLAND	1743-9671	1746-0220		J ENERGY INST	J. Energy Inst.	DEC	2019	92	6
J	Kaushik, VS; Dhanalakshmi, CS; Madhu, P; Tamilselvam, P				Kaushik, Venkatachalam Selvaraj; Dhanalakshmi, Chandrasekaran Sowmya; Madhu, Petchimuthu; Tamilselvam, Palanisamy			Co-pyrolysis of neem wood bark and low-density polyethylene: influence of plastic on pyrolysis product distribution and bio-oil characterization	ENVIRONMENTAL SCIENCE AND POLLUTION RESEARCH			English	Article						Biomass-plastic blend; Thermal degradation; Fixed bed reactor; Synergistic effect; Physical analysis; Chromatographic study	SUGARCANE BAGASSE; THERMAL-DEGRADATION; RECENT PROGRESS; BIOMASS; WASTE; CELLULOSE; YIELD; PARAMETERS; CONVERSION; QUALITY	In this study, the investigation on the effect of plastic during co-pyrolysis with biomass was carried out in a fixed reactor. Pyrolysis of neem wood bark (NB), low density polyethylene (LDPE) and their blends at different ratios was performed in order to evaluate the product distribution. The effects of reaction temperature and NB-to-LDPE blend ratio on product distribution and the chemical comp…	[Kaushik, Venkatachalam Selvaraj; Dhanalakshmi, Chandrasekaran Sowmya; Tamilselvam, Palanisamy] SNS Coll Technol, Dept Mech Engn, Coimbatore 641035, Tamil Nadu, India; [Madhu, Petchimuthu] Karpagam Coll Engn, Dept Mech Engn, Coimbatore 641032, Tamil Nadu, India	SNS College of Technology; Karpagam College of Engineering	Kaushik, VS (corresponding author), SNS Coll Technol, Dept Mech Engn, Coimbatore 641035, Tamil Nadu, India.	kaushikvs84@gmail.com; dr.sowmi100782@gmail.com; pnpmadhu@gmail.com; uptamil@gmail.com	Palanisamy, Tamilselvam/GRS-8304-2022; Madhu, Petchimuthu/ACN-3724-2022	Palanisamy, Tamilselvam/0000-0003-2588-6170; Madhu, P/0000-0001-8599-219X; Sowmya Dhanalakshmi, C/0000-0002-9471-9889					51	21	21	3	32	SPRINGER HEIDELBERG	HEIDELBERG	TIERGARTENSTRASSE 17, D-69121 HEIDELBERG, GERMANY	0944-1344	1614-7499		ENVIRON SCI POLLUT R	Environ. Sci. Pollut. Res.	DEC	2022	29	58
J	Singh, MV				Singh, Man Vir			Pyrolysis Processes and Physiochemical Properties of Liquid Hydrocarbon Fuel from Waste Plastics	CHEMICAL ENGINEERING & TECHNOLOGY			English	Review						Catalysts; Green fuels; Liquid hydrocarbon fuels; Pyrolysis; Waste plastics	BIO-OIL; BIOMASS PYROLYSIS; CATALYTIC PYROLYSIS; CO-PYROLYSIS; LIGNOCELLULOSIC BIOMASS; DENSITY POLYETHYLENE; ACTIVATED CARBON; RENEWABLE FUEL; PRODUCT YIELDS; VALORIZATION	Pyrolysis of blended waste plastics into valuable chemicals such as fuel by using various catalysts is a vital and successful method at 350-500 degrees C. Virgin plastic can be recycled in plastic products once or twice only due to the loss of mechanical properties. The pyrolysis process is an important method for minimizing waste plastics and the need for alternative fuel sources that can at lea…	[Singh, Man Vir] Dev Bhoomi Uttarakhand Univ, Dept Chem, Dehra Dun 248007, India; [Singh, Man Vir] Chandigarh Univ, Univ Ctr Res & Dev, Mohali 140413, Punjab, India	Chandigarh University	Singh, MV (corresponding author), Dev Bhoomi Uttarakhand Univ, Dept Chem, Dehra Dun 248007, India.;Singh, MV (corresponding author), Chandigarh Univ, Univ Ctr Res & Dev, Mohali 140413, Punjab, India.	manvir24365@gmail.com							104	1	1	10	47	WILEY-V C H VERLAG GMBH	WEINHEIM	POSTFACH 101161, 69451 WEINHEIM, GERMANY	0930-7516	1521-4125		CHEM ENG TECHNOL	Chem. Eng. Technol.	JUL	2023	46	7
J	Nardella, F; Bellavia, S; Mattonai, M; Ribechini, E				Nardella, Federica; Bellavia, Simona; Mattonai, Marco; Ribechini, Erika			Co-pyrolysis of biomass and plastic: Synergistic effects and estimation of elemental composition of pyrolysis oil by analytical pyrolysis-gas chromatography/mass spectrometry	BIORESOURCE TECHNOLOGY			English	Article						Biomass; Co-pyrolysis; Synergistic effects; Analytical pyrolysis; Elemental analysis	HIGH-DENSITY POLYETHYLENE; CATALYTIC FAST PYROLYSIS; THERMAL-DEGRADATION; RECENT PROGRESS; WOOD BIOMASS; BIO-OIL; WASTE; MIXTURES; TECHNOLOGY; CONVERSION	This paper presents a study on the pyrolytic behavior of mixtures of lignocellulosic biomass with hydrocarbon plastics using analytical pyrolysis-GC/MS. Semi-quantitative analysis using chromatographic peak areas was used to investigate the composition of the pyrolysis oils and to highlight the occurrence of synergistic effects. A new method is also proposed to estimate the elemental composition …	[Nardella, Federica; Bellavia, Simona; Mattonai, Marco; Ribechini, Erika] Univ Pisa, Dept Chem & Ind Chem, Via G Moruzzi 13, I-56124 Pisa, Italy	University of Pisa	Mattonai, M (corresponding author), Univ Pisa, Dept Chem & Ind Chem, Via G Moruzzi 13, I-56124 Pisa, Italy.	marco.mattonai@dcci.unipi.it	Mattonai, Marco/GVS-1759-2022; Ribechini, Erika/AAH-3769-2020; Ribechini, Erika/M-7210-2014	Ribechini, Erika/0000-0002-4978-2782	COST (European cooperation in Science and Technology) [CA17128]	COST (European cooperation in Science and Technology)(European Cooperation in Science and Technology (COST))	The contribution of COST Action LignoCOST (CA17128), supported by COST (European cooperation in Science and Technology), in promoting interaction, exchange of knowledge and collaborations in the field of lignin valorisation, is gratefully acknowledged.		49	46	47	12	104	ELSEVIER SCI LTD	OXFORD	THE BOULEVARD, LANGFORD LANE, KIDLINGTON, OXFORD OX5 1GB, OXON, ENGLAND	0960-8524	1873-2976		BIORESOURCE TECHNOL	Bioresour. Technol.	JUN	2022	354
J	Mariyam, S; Shahbaz, M; Al-Ansari, T; Mackey, HR; McKay, G				Mariyam, Sabah; Shahbaz, Muhammad; Al-Ansari, Tareq; Mackey, Hamish R.; McKay, Gordon			A critical review on co-gasification and co-pyrolysis for gas production	RENEWABLE & SUSTAINABLE ENERGY REVIEWS			English	Review						Co-gasification; Co-pyrolysis; Syngas; Biomass; Modelling; Gasifier type; Synergy; Catalyst	MUNICIPAL SOLID-WASTE; RICH SYNGAS PRODUCTION; FLUIDIZED-BED; STEAM GASIFICATION; SEWAGE-SLUDGE; THERMOCHEMICAL CONVERSION; LIGNOCELLULOSIC BIOMASS; DENSITY POLYETHYLENE; ANAEROBIC-DIGESTION; RESIDUAL BIOMASS	Sustainable energy resources are a solution to the increasing energy demand caused by the accelerating population growth and the national development in the emerging countries. Biomass wastes, such as municipal solid wastes, sewage sludge, and agriculture wastes have potential to be converted into energy via thermochemical processing methods - pyrolysis and gasification. These waste treatment met…	[Mariyam, Sabah; Shahbaz, Muhammad; Mackey, Hamish R.; McKay, Gordon] Hamad Bin Khalifa Univ, Qatar Fdn, Coll Sci & Engn, Div Sustainable Dev, Doha, Qatar; [Al-Ansari, Tareq] Hamad Bin Khalifa Univ, Qatar Fdn, Div Engn Management & Decis Sci, Coll Sci & Engn, Doha, Qatar	Qatar Foundation (QF); Hamad Bin Khalifa University-Qatar; Qatar Foundation (QF); Hamad Bin Khalifa University-Qatar	McKay, G (corresponding author), Hamad Bin Khalifa Univ, Qatar Fdn, Coll Sci & Engn, Div Sustainable Dev, Doha, Qatar.	gmckay@hbku.edu.qa	McKay, Gareth/HNJ-3797-2023; Shahbaz, Muhammad/R-9625-2019; Mackey, Hamish/M-6790-2017	Al-Ansari, Tareq/0000-0002-2932-8240; Shahbaz, Muhammad/0000-0003-2295-8167; Mariyam, Sabah/0000-0002-4766-5726; McKay, Gordon/0000-0001-9965-7659	Qatar National Research Fund [NPRP11S-0117-180328]	Qatar National Research Fund(Qatar National Research Fund (QNRF))	Acknowledgement The authors would like to thank Qatar National Research Fund for supporting this research under the National Priorities Research Program Award Number NPRP11S-0117-180328. Any opinions, findings and conclusions, or recommendations expressed in this material are those of the authors and do not necessarily reflect the views of Hamad Bin Khalifa University or Qatar Foundation. The aut…		159	77	81	24	214	PERGAMON-ELSEVIER SCIENCE LTD	OXFORD	THE BOULEVARD, LANGFORD LANE, KIDLINGTON, OXFORD OX5 1GB, ENGLAND	1364-0321	1879-0690		RENEW SUST ENERG REV	Renew. Sust. Energ. Rev.	JUN	2022	161
J	Shagali, AA; Hu, S; Li, HJ; He, LM; Han, HD; Chi, HY; Qing, HR; Xu, J; Jiang, L; Wang, Y; Su, S; Xiang, J				Shagali, Abdulmajid Abdullahi; Hu, Song; Li, Hanjian; He, Limo; Han, Hengda; Chi, Huanying; Qing, Haoran; Xu, Jun; Jiang, Long; Wang, Yi; Su, Sheng; Xiang, Jun			Synergistic interactions and co-pyrolysis characteristics of lignocellulosic biomass components and plastic using a fast heating concentrating photothermal TGA system	RENEWABLE ENERGY			English	Article						Pyrolysis; Plastic; Biomass; Synergistic interaction; Kinetic analysis	EVOLVED GAS-ANALYSIS; THERMAL-DEGRADATION; KINETIC-ANALYSIS; CELLULOSE; BEHAVIOR; MODEL; FTIR; DECOMPOSITION; HEMICELLULOSE; WASTES	Co-pyrolysis of lignocellulosic biomass (LCB) with plastic has gained significant attention recently. Studying the pyrolysis kinetic behavior of LCB and plastic is beneficial for developing a framework for designing and improving biofuel production. The co-pyrolysis behavior, synergistic interactions and kinetic triplet parameters of the three main LCB components, i.e., cellulose, hemicellulose a…	[Shagali, Abdulmajid Abdullahi; Hu, Song; Li, Hanjian; He, Limo; Han, Hengda; Chi, Huanying; Qing, Haoran; Xu, Jun; Jiang, Long; Wang, Yi; Su, Sheng; Xiang, Jun] Huazhong Univ Sci & Technol, Sch Energy & Power Engn, State Key Lab Coal Combust, Wuhan 430074, Hubei, Peoples R China; [Chi, Huanying] Wuhan Text Univ, Sch Environm Engn, Wuhan 430200, Peoples R China; [Jiang, Long] Huazhong Univ Sci & …	Huazhong University of Science & Technology; Wuhan Textile University; Huazhong University of Science & Technology; National University of Singapore	Hu, S; He, LM (corresponding author), Huazhong Univ Sci & Technol, Sch Energy & Power Engn, State Key Lab Coal Combust, Wuhan 430074, Hubei, Peoples R China.	husong_hust@hotmail.com; limo_615@163.com	Shagali, Abdulmajid/JNR-0856-2023; Wang, Yi/X-8066-2019; Sun, Yang/KHY-5117-2024; Jiang, Long/I-2764-2017; Xiang, Jun/C-5472-2016	Abdullahi Shagali, Abdulmajid/0000-0002-1205-3981; Xiang, Jun/0000-0002-0627-1528; He, Limo/0000-0002-1304-549X	National Natural Science Foundation of China [52076097]; National Key Research and Development Program of China [2018YFE0127500]	National Natural Science Foundation of China(National Natural Science Foundation of China (NSFC)); National Key Research and Development Program of China(National Key Research & Development Program of China)	This research was financially supported by the National Natural Science Foundation of China (NSFC No. 52076097) and the National Key Research and Development Program of China (No. 2018YFE0127500) . The authors also acknowledge the extended help from the Analytical and Testing Center of Huazhong University of Science and Technology.		48	17	17	13	64	PERGAMON-ELSEVIER SCIENCE LTD	OXFORD	THE BOULEVARD, LANGFORD LANE, KIDLINGTON, OXFORD OX5 1GB, ENGLAND	0960-1481	1879-0682		RENEW ENERG	Renew. Energy	OCT	2023	215
J	Almalki, ASA; Alhadhrami, A; Alsanie, WF; Kamarudin, SK; Pugazhendhi, A				Almalki, Abdulraheem S. A.; Alhadhrami, A.; Alsanie, Walaa F.; Kamarudin, S. K.; Pugazhendhi, A.			Catalytic co-pyrolysis of plastic pyrolyzed and biooil over Ni-modified ZSM-5 hierarchical structures	ENVIRONMENTAL RESEARCH			English	Article						Biooil; Plastic pyrolyzed oil; Catalytic cracking; Ni/HZSM-5; Co -pyrolysis	THERMAL-DEGRADATION; BIOMASS; CRACKING; WASTE; DECOMPOSITION; HYDROCARBONS; ZEOLITE; OIL	Hierarchical designing of (10 wt% - 70 wt%) nickel over HZSM-5 zeolite was done using wet-impregnation method. The material formation was established by XRD, BET, TPD and TEM studies. Optimization of reaction parameters for mixture of LDPE derived oil and waste cooking oil was found to be 450 degrees C, 4.6 h-1, 1:1, and 2nd h. The oxygenated and aliphatic molecules from catalytic co-pyrolysis we…	[Almalki, Abdulraheem S. A.; Alhadhrami, A.] Taif Univ, Fac Sci, Dept Chem, Taif 21974, Saudi Arabia; [Alsanie, Walaa F.] Taif Univ, Fac Appl Med Sci, Dept Clin Lab Sci, Taif, Saudi Arabia; [Alsanie, Walaa F.] Taif Univ, Ctr Biomed Sci Res CBSR, Deanship Sci Res, Taif, Saudi Arabia; [Kamarudin, S. K.; Pugazhendhi, A.] Univ Kebangsaan Malaysia, Fuel Cell Inst, Bangi 43600, Selangor, Malaysia; [Kam…	Taif University; Taif University; Taif University; Universiti Kebangsaan Malaysia; Universiti Kebangsaan Malaysia	Pugazhendhi, A (corresponding author), Univ Kebangsaan Malaysia, Fuel Cell Inst, Bangi 43600, Selangor, Malaysia.	arivu.puga85@yahoo.com	Alsanie, Walaa/ABF-5059-2021; Kamarudin, Siti/M-8281-2016; Pugazhendhi, Arivalagan/F-5411-2018; Almalki, Adulraheem/ABI-3164-2020	Alsanie, Walaa/0000-0002-1291-0111	Taif University, Taif, Saudi Arabia [TURSP-HC2023/6]	Taif University, Taif, Saudi Arabia(Taif University)	This project was supported by Taif University Researchers Supporting Project number (TURSP-HC2023/6) Taif University, Taif, Saudi Arabia.		74	6	6	13	35	ACADEMIC PRESS INC ELSEVIER SCIENCE	SAN DIEGO	525 B ST, STE 1900, SAN DIEGO, CA 92101-4495 USA	0013-9351	1096-0953		ENVIRON RES	Environ. Res.	JAN 1	2024	240		2
J	Vanapalli, KR; Bhattacharya, J; Samal, B; Chandra, S; Medha, I; Dubey, BK				Vanapalli, Kumar Raja; Bhattacharya, Jayanta; Samal, Biswajit; Chandra, Subhash; Medha, Isha; Dubey, Brajesh K.			Inhibitory and synergistic effects on thermal behaviour and char characteristics during the co-pyrolysis of biomass and single-use plastics	ENERGY			English	Article						Co-pyrolysis; Biomass; Single-use plastics; Kinetics; Thermogravimetric analysis; Synergy	THERMOGRAVIMETRIC ANALYSIS; WASTE PLASTICS; POLYETHYLENE; KINETICS; DEGRADATION; MIXTURES; BLENDS; SHELL; FUEL; PARAMETERS	The co-pyrolytic behaviour of single-use plastics (Polystyrene, Low-density polyethylene) and Eucalyptus biomass was investigated at variable temperatures (300, 400, 500, and 600 degrees C) and the effects of their interactions on the characteristics of solid chars were also studied. The variation in thermal profiles of 'Delta Mass loss%' showed the inhibitory and synergistic effects of plastics …	[Vanapalli, Kumar Raja; Bhattacharya, Jayanta; Samal, Biswajit; Chandra, Subhash; Dubey, Brajesh K.] Indian Inst Technol, Sch Environm Sci & Engn, Kharagpur 721302, W Bengal, India; [Bhattacharya, Jayanta; Medha, Isha] Indian Inst Technol, Dept Min Engn, Kharagpur 721302, W Bengal, India; [Dubey, Brajesh K.] Indian Inst Technol, Dept Civil Engn, Kharagpur 721302, W Bengal, India; [Chandra, Subhas…	Indian Institute of Technology System (IIT System); Indian Institute of Technology (IIT) - Kharagpur; Indian Institute of Technology System (IIT System); Indian Institute of Technology (IIT) - Kharagpur; Indian Institute of Technology System (IIT System); Indian Institute of Technology (IIT) - Kharagpur	Bhattacharya, J (corresponding author), Indian Inst Technol, Sch Environm Sci & Engn, Kharagpur 721302, W Bengal, India.	jayantab@mining.iitkgp.ernet.in	Dubey, Brajesh/AAJ-4555-2020; Vanapalli, Kumar Raja/GLS-4680-2022; Chandra, Subhash/AAV-5633-2021	Vanapalli, Kumar Raja/0000-0002-2317-8245; Medha, Isha/0000-0001-6931-1614; Samal, Dr. Biswajit/0009-0004-0520-3293; Chandra, Subhash/0000-0003-0125-7601	ministry of human resource and development (MHRD) , Government of India	ministry of human resource and development (MHRD) , Government of India(Ministry of Human Resource Development (MHRD), Government of India)	The authors sincerely acknowledge the ministry of human resource and development (MHRD) , Government of India, for the financial support of the first, third, fourth, and fifth authors. The authors are grateful to the Indian Institute of Technology, Khar-agpur, for all the research facilities provided. The authors also acknowledge the assistance of Mr. Rajesh Kola during elemental analysis.		61	28	30	5	35	PERGAMON-ELSEVIER SCIENCE LTD	OXFORD	THE BOULEVARD, LANGFORD LANE, KIDLINGTON, OXFORD OX5 1GB, ENGLAND	0360-5442	1873-6785		ENERGY	Energy	NOV 15	2021	235
J	Akyurek, Z; Coskun, S				Akyurek, Zuhal; Coskun, Semih			Kinetics and thermodynamic behaviour evaluation of olive residue/recycled polyester pyrolysis	INDIAN JOURNAL OF CHEMICAL TECHNOLOGY			English	Article						Co-pyrolysis; Kinetics; Olive residue; Recycled polyester fabric; Thermodynamic parameters; Thermo gravimetric analysis	CO-PYROLYSIS; THERMAL-BEHAVIOR; THERMOGRAVIMETRIC ANALYSIS; BIOMASS; POLYETHYLENE; GASIFICATION	The growing amounts of plastic and biomass wastes have become a global problem challenging the environmental sustainability. In this regard, waste to energy technologies has gained more importance to convert waste inventory into useful energy and value added products. In this study, pyrolysis characteristics of a textile industry waste (recycled polyester fabric, RPF) and an agricultural waste (o…	[Akyurek, Zuhal] Burdur Mehmet Akif Ersoy Univ, Fac Engn & Architecture, Dept Energy Syst Engn, Burdur, Turkey; [Coskun, Semih] Pamukkale Univ, Fac Engn, Dept Ind Engn, Denizli, Turkey	Mehmet Akif Ersoy University; Pamukkale University	Akyurek, Z (corresponding author), Burdur Mehmet Akif Ersoy Univ, Fac Engn & Architecture, Dept Energy Syst Engn, Burdur, Turkey.	drzuhalakyurek@gmail.com		akyurek, zuhal/0000-0003-3102-4278					25	1	1	0	8	NATL INST SCIENCE COMMUNICATION-NISCAIR	NEW DELHI	DR K S KRISHNAN MARG, PUSA CAMPUS, NEW DELHI 110 012, INDIA	0971-457X	0975-0991		INDIAN J CHEM TECHN	Indian J. Chem. Technol.	JUL	2021	28	4
J	Zeng, Y; Wang, YP; Liu, YH; Dai, LL; Wu, QH; Xia, ML; Zhang, SM; Ke, LY; Zou, RG; Ruan, R				Zeng, Yuan; Wang, Yunpu; Liu, Yuhuan; Dai, Leilei; Wu, Qiuhao; Xia, Meiling; Zhang, Shumei; Ke, Linyao; Zou, Rongge; Ruan, Roger			Microwave catalytic co-pyrolysis of waste cooking oil and low-density polyethylene to produce monocyclic aromatic hydrocarbons: Effect of different catalysts and pyrolysis parameters	SCIENCE OF THE TOTAL ENVIRONMENT			English	Article						Co-pyrolysis; Waste cooking oil; Low-density polyethylene; HZSM-5	ASSISTED PYROLYSIS; PLASTIC WASTES; CELLULOSE; BIOMASS; FUEL; LIGNIN; CONVERSION; HZSM-5	It is promising to convert waste oil and plastics to renewable fuels and chemicals by microwave catalytic co-pyrolysis, enabling pollution reduction and resource recovery. The purpose of this study was to evaluate the effect of catalysts on the product selectivity of microwave-assisted co-pyrolysis of waste cooking oil and low-density polyethylene and op-timize the pyrolysis process, including py…	[Zeng, Yuan; Wang, Yunpu; Liu, Yuhuan; Dai, Leilei; Wu, Qiuhao; Xia, Meiling; Zhang, Shumei; Ke, Linyao] Nanchang Univ, Engn Res Ctr Biomass Convers, State Key Lab Food Sci & Technol, Minist Educ, Nanchang 330047, Jiangxi, Peoples R China; [Dai, Leilei; Ruan, Roger] Univ Minnesota, Ctr Biorefining, 1390 Eckles Ave, St Paul, MN 55108 USA; [Dai, Leilei; Ruan, Roger] Univ Minnesota, Dept Bioprod & B…	Nanchang University; University of Minnesota System; University of Minnesota Twin Cities; University of Minnesota System; University of Minnesota Twin Cities; Washington State University	Wang, YP (corresponding author), Nanchang Univ, Engn Res Ctr Biomass Convers, MOE, 235 Nanjing East Rd, Nanchang 330047, Jiangxi, Peoples R China.	wangyunpu@ncu.edu.cn	Ruan, Roger/ABE-4317-2021; zou, rongge/JBS-4779-2023; Wu, Qiuhao/HNO-8620-2023		National Natural Science Foundation of China [52166015, 22166026, 21766019]; Centrally Guided Local Science Technology Special Project [20202ZDB01012]; Major Discipline Academic and Technical Leaders Training Program of Jiangxi Province [20204BCJ23011]; Jiangxi Provincial Natural Science Foundation [20212ACB215007]	National Natural Science Foundation of China(National Natural Science Foundation of China (NSFC)); Centrally Guided Local Science Technology Special Project; Major Discipline Academic and Technical Leaders Training Program of Jiangxi Province; Jiangxi Provincial Natural Science Foundation	This project was financially supported by the National Natural Science Foundation of China (No. 52166015; No. 22166026; No. 21766019), The Centrally Guided Local Science Technology Special Project (20202ZDB01012), The Major Discipline Academic and Technical Leaders Training Program of Jiangxi Province (20204BCJ23011), The Jiangxi Provincial Natural Science Foundation (20212ACB215007).		44	46	48	13	118	ELSEVIER	AMSTERDAM	RADARWEG 29, 1043 NX AMSTERDAM, NETHERLANDS	0048-9697	1879-1026		SCI TOTAL ENVIRON	Sci. Total Environ.	FEB 25	2022	809
J	Zhao, J; Wang, SZ; Wu, ZQ; Meng, HY; Chen, L				Zhao Jun; Wang Shuzhong; Wu Zhiqiang; Meng Haiyu; Chen Lin			Hydrogen-rich syngas produced from the co-pyrolysis of municipal solid waste and wheat straw	INTERNATIONAL JOURNAL OF HYDROGEN ENERGY			English	Article						Municipal solid waste; Biomass; Pyrolysis; Syngas	PLASTIC WASTE; RAPID PYROLYSIS; ALKALI-METAL; BIOMASS; YIELD; FUEL; WOOD; GASIFICATION; MICROWAVE; OXIDATION	The co-thermochemical conversion of Municipal Solid Waste (MSW) and biomass is a new environmental technology and can produce hydrogen-rich syngas. This study investigated the co-pyrolysis of MSW and wheat straw, using a drop-tube furnace experiment. Using a temperature range of 500 degrees C-1000 degrees C, the study assessed pyrolysis gas yield, product distribution, gas low heating value, and …	[Zhao Jun; Wang Shuzhong; Wu Zhiqiang; Meng Haiyu; Chen Lin] Xi An Jiao Tong Univ, Sch Energy & Power Engn, Minist Educ, Key Lab Thermo Fluid Sci & Engn, Xian 710049, Shaanxi, Peoples R China	Xi'an Jiaotong University	Wang, SZ (corresponding author), Xi An Jiao Tong Univ, Sch Energy & Power Engn, Minist Educ, Key Lab Thermo Fluid Sci & Engn, Xian 710049, Shaanxi, Peoples R China.	szwang@aliyun.com	wu, zhiqiang/HTP-9144-2023; Jun, Zhao/IYT-2539-2023		Low-Carbon Development Special Fund of Guangdong Province, China [2011-1273]	Low-Carbon Development Special Fund of Guangdong Province, China	This work was financially supported by the Low-Carbon Development Special Fund of Guangdong Province, China (No: 2011-1273).		47	52	53	6	119	PERGAMON-ELSEVIER SCIENCE LTD	OXFORD	THE BOULEVARD, LANGFORD LANE, KIDLINGTON, OXFORD OX5 1GB, ENGLAND	0360-3199	1879-3487		INT J HYDROGEN ENERG	Int. J. Hydrog. Energy	AUG 3	2017	42	31
J	Liu, X; Burra, KG; Wang, ZW; Li, JH; Che, DF; Gupta, AK				Liu, Xuan; Burra, Kiran G.; Wang, Zhiwei; Li, Jinhu; Che, Defu; Gupta, Ashwani K.			On deconvolution for understanding synergistic effects in co-pyrolysis of pinewood and polypropylene	APPLIED ENERGY			English	Article						Synergistic effects; Feedstock configuration; Volatiles interaction; Char catalytic effect; Plastic wastes	THERMAL-DECOMPOSITION; FLUIDIZED-BED; GASIFICATION; BIOMASS; POLYMERS; SYNGAS; MECHANISM; MIXTURES; HYDROGEN; KINETICS	The synergistic effects on syngas observed in co-pyrolysis of pinewood and polypropylene (PP) were systematically investigated on a fixed bed reactor with tailored feedstock configurations in this paper. The synergistic effects focused on evolutionary and cumulative behaviors of evolved syngas were quantified by juxtaposing the results from co-pyrolysis of pinewood-PP mixtures with weighted resul…	[Liu, Xuan; Burra, Kiran G.; Wang, Zhiwei; Li, Jinhu; Gupta, Ashwani K.] Univ Maryland, Dept Mech Engn, Combust Lab, College Pk, MD 20742 USA; [Liu, Xuan; Che, Defu] Xi An Jiao Tong Univ, Sch Energy & Power Engn, State Key Lab Multiphase Flow Power Engn, Xian 710049, Peoples R China; [Wang, Zhiwei] Henan Acad Sci, Energy Res Inst Co Ltd, Henan Key Lab Biomass Energy, Zhengzhou 450008, Peoples R C…	University System of Maryland; University of Maryland College Park; Xi'an Jiaotong University; Henan Academy of Sciences; China University of Mining & Technology	Gupta, AK (corresponding author), Univ Maryland, Dept Mech Engn, Combust Lab, College Pk, MD 20742 USA.	akgupta@umd.edu	Wang, Zhi-Wei/P-1561-2018; Li, Jinhu/N-8954-2014; Liu, Xuan/KPA-3316-2024	Liu, Xuan/0000-0002-6857-0566; Gupta, Ashwani/0000-0001-8047-8706	Office of Naval Research, United States; China Scholarship Council	Office of Naval Research, United States(United States Department of DefenseUnited States NavyOffice of Naval Research); China Scholarship Council(China Scholarship Council)	This research was supported by Office of Naval Research, United States and their support is gratefully acknowledged. The support provided to the authors (Xuan Liu, Zhiwei Wang, and Jinhu Li) from China Scholarship Council is gratefully acknowledged. The authors also acknowledge Mengju Zhang from Henan Key Lab of Biomass Energy, Energy Research Institute Co. Ltd., Henan Academy of Sciences, Zhengz…		37	71	82	7	96	ELSEVIER SCI LTD	OXFORD	THE BOULEVARD, LANGFORD LANE, KIDLINGTON, OXFORD OX5 1GB, OXON, ENGLAND	0306-2619	1872-9118		APPL ENERG	Appl. Energy	DEC 1	2020	279
J	Burra, KRG; Liu, X; Wang, ZW; Li, JH; Che, DF; Gupta, AK				Burra, Kiran Raj G.; Liu, Xuan; Wang, Zhiwei; Li, Jinhu; Che, Defu; Gupta, Ashwani K.			Quantifying the sources of synergistic effects in co-pyrolysis of pinewood and polystyrene	APPLIED ENERGY			English	Article						Co-pyrolysis; Polystyrene; Synergistic effects; Volatiles interaction; Catalytic char; Feed-flexible	FLUIDIZED-BED; LIGNOCELLULOSIC BIOMASS; HYDROGEN-PRODUCTION; STEAM GASIFICATION; BIO-OIL; IN-SITU; WASTE; POLYETHYLENE; PLASTICS; MIXTURES	Co-processing of biomass and plastic wastes via pyrolysis and gasification for feed-flexibility revealed the presence of synergistic enhancement of H-2 and syngas yield and lowering of char and tar yields. However, an understanding of the source of these interactions and their quantification is lacking. To address this, we investigated the co-pyrolysis of pinewood (PW) and polystyrene (PS) blends…	[Burra, Kiran Raj G.; Liu, Xuan; Wang, Zhiwei; Li, Jinhu; Gupta, Ashwani K.] Univ Maryland, Dept Mech Engn, Combust Lab, College Pk, MD 20742 USA; [Liu, Xuan] Hunan Univ, Coll Environm Sci & Engn, Key Lab Environm Biol & Pollut Control, Minist Educ, Changsha 410082, Hunan, Peoples R China; [Liu, Xuan; Che, Defu] Xi An Jiao Tong Univ, Sch Energy & Power Engn, State Key Lab Multiphase Flow Power En…	University System of Maryland; University of Maryland College Park; Hunan University; Xi'an Jiaotong University; Henan University of Technology; Anhui University of Science & Technology	Gupta, AK (corresponding author), Univ Maryland, Dept Mech Engn, Combust Lab, College Pk, MD 20742 USA.	akgupta@umd.edu	Wang, Zhi-Wei/P-1561-2018; Li, Jinhu/N-8954-2014	Gupta, Ashwani/0000-0001-8047-8706	Office of Naval Research; China Scholarship Council [CSC201906280344]	Office of Naval Research(United States Department of DefenseUnited States NavyOffice of Naval Research); China Scholarship Council(China Scholarship Council)	This research was supported by Office of Naval Research and their support is gratefully acknowledged. The support provided to the authors (Xuan Liu, Zhiwei Wang, and Jinhu Li) from China Scholarship Council (CSC201906280344) is gratefully acknowledged.		58	47	47	2	78	ELSEVIER SCI LTD	OXFORD	THE BOULEVARD, LANGFORD LANE, KIDLINGTON, OXFORD OX5 1GB, OXON, ENGLAND	0306-2619	1872-9118		APPL ENERG	Appl. Energy	NOV 15	2021	302
J	Biessey, P; Vogel, J; Seitz, M; Quicker, P				Biessey, Philip; Vogel, Julia; Seitz, Mathias; Quicker, Peter			Plastic Waste Utilization via Chemical Recycling: Approaches, Limitations, and the Challenges Ahead	CHEMIE INGENIEUR TECHNIK			English	Review						Advanced recycling; Circular economy; Downstream processing; Legal framework for plastic waste; Waste-to-product	PYROLYSIS OILS; CO-PYROLYSIS; GASIFICATION; BIOMASS; OPPORTUNITIES; POLYMERS; FUELS; ART	Chemical recycling offers the opportunity to foster the transition towards a circular economy for plastics as a complementary strategy for mechanical recycling. For the implementation of chemical recycling technologies, there are still significant challenges ahead that - besides the definition of binding legal frameworks - need for intensified research: knowledge-based methods for both the identi…	[Biessey, Philip] Ruhr Univ Bochum, Responsible Proc Engn, Univ Str 150, D-44801 Bochum, Germany; [Vogel, Julia] German Environm Agcy, Sect Waste Technol 3 2 4, Waste Technol Transfer, Worlitzer Pl 1, D-06844 Dessau Rosslau, Germany; [Seitz, Mathias] Univ Appl Sci, Dept Engn & Nat Sci, Proc & Chem React Engn, Eberhard Leibnitz Str 2, D-06217 Merseburg, Germany; [Quicker, Peter] Rhein Westfal TH A…	Ruhr University Bochum; RWTH Aachen University	Biessey, P (corresponding author), Ruhr Univ Bochum, Responsible Proc Engn, Univ Str 150, D-44801 Bochum, Germany.	biessey@rpe.ruhr-uni-bochum.de		Seitz, Mathias/0000-0002-4527-7527; Biessey, Philip/0000-0002-4036-2378					98	8	8	13	36	WILEY-V C H VERLAG GMBH	WEINHEIM	POSTFACH 101161, 69451 WEINHEIM, GERMANY	0009-286X	1522-2640		CHEM-ING-TECH	Chem. Ing. Tech.	AUG	2023	95	8
J	Wu, YF; Wang, GJ; Zhu, JL; Wang, YM; Yang, H; Jin, LJ; Hu, HQ				Wu, Yunfei; Wang, Guijin; Zhu, Jialong; Wang, Yiming; Yang, He; Jin, Lijun; Hu, Haoquan			Insight into synergistic effect of co-pyrolysis of low-rank coal and waste polyethylene with or without additives using rapid infrared heating	JOURNAL OF THE ENERGY INSTITUTE			English	Article						Low-rank coal; Waste polyethylene; Co-pyrolysis; Infrared heating; Synergistic effects	LOW-DENSITY POLYETHYLENE; ELECTRON-SPIN-RESONANCE; FLUIDIZED-BED; PLASTIC WASTE; FREE-RADICALS; BIOMASS; PRODUCTS; KINETICS; BEHAVIOR; RESIDUE	A newly infrared-heated reactor with a high heating rate (20 degrees C/s) was applied to explore the co-pyrolysis interactions between low-rank coal and waste polyethylene (PE), and further observe the effect of organic plastic additives (OPAs) in PE on co-pyrolysis interactions. PEs pyrolysis results revealed that white PE hose without additives (WPE) and black PE threading pipe with additives (…	[Wu, Yunfei; Wang, Guijin; Zhu, Jialong; Wang, Yiming; Yang, He; Jin, Lijun; Hu, Haoquan] Dalian Univ Technol, Inst Coal Chem Engn, Sch Chem Engn, State Key Lab Fine Chem, Dalian 116024, Peoples R China	Dalian University of Technology; STATE KEY LABORATORY SURFACTANT FINE CHEMISTRY	Hu, HQ (corresponding author), Dalian Univ Technol, Inst Coal Chem Engn, Sch Chem Engn, State Key Lab Fine Chem, Dalian 116024, Peoples R China.	hhu@dlut.edu.cn	yiming, wang/AAV-1014-2021; wu, yunfei/LBH-7644-2024; jin, lijun/E-2773-2013	Wang, Yiming/0000-0003-3037-9755; Hu, Haoquan/0000-0002-5288-2186; Jin, Lijun/0000-0002-8684-1120	National Natural Science Foundation of China [22078053]; Innovation Team Support Program in Key Areas of Dalian Science and Technology Bureau [2019RT10]; Fundamental Research Funds for the Central Univer-sities [DUT2021TB03]; Liaoning Revitalization Talent Project [XLYC1908033]	National Natural Science Foundation of China(National Natural Science Foundation of China (NSFC)); Innovation Team Support Program in Key Areas of Dalian Science and Technology Bureau; Fundamental Research Funds for the Central Univer-sities(Fundamental Research Funds for the Central Universities); Liaoning Revitalization Talent Project	The authors are grateful to the financial support from the National Natural Science Foundation of China (No. 22078053) , Innovation Team Support Program in Key Areas of Dalian Science and Technology Bureau (2019RT10) , the Fundamental Research Funds for the Central Univer-sities (DUT2021TB03) , and Liaoning Revitalization Talent Project (XLYC1908033) .		49	27	31	19	108	ELSEVIER SCI LTD	OXFORD	THE BOULEVARD, LANGFORD LANE, KIDLINGTON, OXFORD OX5 1GB, OXON, ENGLAND	1743-9671	1746-0220		J ENERGY INST	J. Energy Inst.	JUN	2022	102
J	Ephraim, A; Minh, DP; Lebonnois, D; Peregrina, C; Sharrock, P; Nzihou, A				Ephraim, Augustina; Doan Pham Minh; Lebonnois, Damien; Peregrina, Carlos; Sharrock, Patrick; Nzihou, Ange			Co-pyrolysis of wood and plastics: Influence of plastic type and content on product yield, gas composition and quality	FUEL			English	Article						Waste; Co-pyrolysis; Wood; Polystyrene; Polyvinyl chloride; Thermodynamic equilibrium	BIO-OIL YIELD; PART 1; HEATING VALUE; PALM SHELL; HIGH-GRADE; BIOMASS; WASTE; MIXTURES; HYDROCARBONS; POLYETHYLENE	In recent years, the world has witnessed a rapid rise in waste production and energy demand, which has increased interests in waste to energy processes, particularly the co-pyrolysis of wood and plastic waste. Nonetheless, for plastic waste, most research studies narrowly focus on polyolefins because of their abundance in waste streams and their high oil yields from pyrolysis. In this paper, we s…	[Ephraim, Augustina; Doan Pham Minh; Sharrock, Patrick; Nzihou, Ange] Univ Toulouse, CNRS, RAPSODEE, Mines Albi,UMR 5302, Campus Jarlard, F-81013 Albi 09, France; [Lebonnois, Damien; Peregrina, Carlos] SUEZ, 38 Rue President Wilson, F-78230 Le Pecq, France	IMT - Institut Mines-Telecom; Universite Federale Toulouse Midi-Pyrenees (ComUE); Universite de Toulouse; IMT Mines Albi; Centre National de la Recherche Scientifique (CNRS); CNRS - Institute for Engineering & Systems Sciences (INSIS)	Ephraim, A (corresponding author), Univ Toulouse, CNRS, RAPSODEE, Mines Albi,UMR 5302, Campus Jarlard, F-81013 Albi 09, France.	aug.ephraim@gmail.com	MINH, Doan/ABF-6287-2020	PHAM MINH, Doan/0000-0001-7770-1487; Nzihou, Ange/0000-0002-1547-2567					31	124	133	4	189	ELSEVIER SCI LTD	OXFORD	THE BOULEVARD, LANGFORD LANE, KIDLINGTON, OXFORD OX5 1GB, OXON, ENGLAND	0016-2361	1873-7153		FUEL	Fuel	NOV 1	2018	231
J	Zou, RG; Wang, CX; Qian, MRK; Lei, RY; Zhao, YF; Zhang, QF; Huo, ER; Kong, X; Lin, XA; Wang, L; Zhang, XS; Gluth, A; Harahap, B; Wang, YP; Dai, LL; Zhao, JK; Ruan, RG; Lei, HW				Zou, Rongge; Wang, Chenxi; Qian, Moriko; Lei, Ryan; Zhao, Yunfeng; Zhang, Qingfa; Huo, Erguang; Kong, Xiao; Lin, Xiaona; Wang, Lu; Zhang, Xuesong; Gluth, Austin; Harahap, Budi; Wang, Yunpu; Dai, Leilei; Zhao, Jikai; Ruan, Roger; Lei, Hanwu			Catalytic fast co-pyrolysis of Douglas Fir and low-density polyethylene with nanocellulose-derived carbon catalyst for enhancing selectivity of hydrogen in syngas and mono-aromatic hydrocarbon in bio-oil products	CHEMICAL ENGINEERING JOURNAL			English	Article						Plastics; Biomass; Co-CFP; Hydrogen; Green carbon catalyts	ACTIVATED CARBON; BIOMASS; BIOCHAR; TAR; HEMICELLULOSE; CELLULOSE; CRACKING; SURFACE; FUEL	To enhance the quality of raw bio-oil derived from the pyrolysis of biomass, hydrogen-rich reactants such as waste plastics, cooking oils, and soap stock are frequently incorporated into the fast catalytic co-pyrolysis (coCFP) of biomass. Nevertheless, widespread uses of acids, bases, and zeolite catalysts must address concerns such as easy to coke, regeneration challenges, and environmental impa…	[Zou, Rongge; Wang, Chenxi; Qian, Moriko; Lei, Ryan; Zhao, Yunfeng; Zhang, Qingfa; Huo, Erguang; Kong, Xiao; Lin, Xiaona; Gluth, Austin; Harahap, Budi; Lei, Hanwu] Washington State Univ, Dept Biol Syst Engn, 2710 Crimson Way, Richland, WA 99354 USA; [Zhao, Yunfeng] Shihezi Univ, Sch Food Sci & Technol, Shihezi 832003, Xinjiang, Peoples R China; [Zhang, Qingfa] Anhui Agr Univ, Sch Engn, Hefei 2300…	Washington State University; Shihezi University; Anhui Agricultural University; Suzhou University of Science & Technology; University of Shanghai for Science & Technology; Shandong University of Technology; Hefei University of Technology; China Agricultural University; Nanchang University; University of Minnesota System; University of Minnesota Twin Cities; University of Minnesota System; Univers…	Lei, HW (corresponding author), Washington State Univ, Dept Biol Syst Engn, 2710 Crimson Way, Richland, WA 99354 USA.	hlei@wsu.edu	Ruan, Roger/ABE-4317-2021; Zhang, Xuesong/JMQ-7240-2023; zou, rongge/JBS-4779-2023; Li, yu/HHZ-5236-2022; Lei, Hanwu/S-1122-2019; Wang, Chenxi/AAK-9859-2021	Lin, Xiaona/0000-0002-9697-1658; Wang, Lu/0000-0001-5440-5511; Wang, Chenxi/0000-0003-0368-0120; Gluth, Austin/0000-0003-3078-8081	National Institute of Food and Agriculture (NIFA), United States Department of Agriculture (USDA) through the Agriculture and Food Research Initiative (AFRI) [2016-67021-24533, 2018- 67009-27904]	National Institute of Food and Agriculture (NIFA), United States Department of Agriculture (USDA) through the Agriculture and Food Research Initiative (AFRI)	This work is funded by the National Institute of Food and Agriculture (NIFA) , United States Department of Agriculture (USDA) through the Agriculture and Food Research Initiative (AFRI) that is a leading competitive grants program (Grant no. 2016-67021-24533 and 2018- 67009-27904) . We would like to appreciate Dr. Aftab Ahamed for his assistance with the GC/MS study. We also thank Dr. Valerie Lyn…		63	11	12	10	69	ELSEVIER SCIENCE SA	LAUSANNE	PO BOX 564, 1001 LAUSANNE, SWITZERLAND	1385-8947	1873-3212		CHEM ENG J	Chem. Eng. J.	OCT 15	2023	474
J	Bu, Q; Cao, MJ; Wang, M; Zhang, XD; Mao, HP				Bu, Quan; Cao, Mengjie; Wang, Mei; Zhang, Xiaodong; Mao, Hanping			The effect of torrefaction and ZSM-5 catalyst for hydrocarbon rich bio-oil production from co-pyrolysis of cellulose and low density polyethylene via microwave-assisted heating	SCIENCE OF THE TOTAL ENVIRONMENT			English	Article						Biomass; Bio-oil; Torrefaction; Co-pyrolysis; Microwave heating; Kinetics	LIGNOCELLULOSIC BIOMASS; TORREFIED BIOMASS; THERMAL-BEHAVIOR; WASTE PLASTICS; KINETICS; LIGNIN; POLYPROPYLENE; CONVERSION; HZSM-5; YIELD	This study aims to investigate the effect of microwave torrefaction and ZSM-5 catalyst for hydrocarbon rich bio-oil production from microwave co-pyrolysis of cellulose and low density polyethylene (LDPE). FTIR analysis displayed remarkable reductions of active hydroxyl and ether groups in microwave torrefied cellulose (MTC), demonstrating that cellulose was less stable than MTC. GC/MS analysis in…	[Bu, Quan; Cao, Mengjie; Wang, Mei; Zhang, Xiaodong; Mao, Hanping] Jiangsu Univ, Minist Educ, Key Lab Modern Agr Equipment & Technol, Zhenjiang 212013, Jiangsu, Peoples R China	Jiangsu University	Bu, Q; Zhang, XD (corresponding author), Jiangsu Univ, Minist Educ, Key Lab Modern Agr Equipment & Technol, Zhenjiang 212013, Jiangsu, Peoples R China.	qbu@ujs.edu.cn; zxd700227@126.com	cao, mengmeng/HJB-1637-2022; zhang, xiaodong/HNS-5895-2023		National Natural Science Foundation of China [21905117, 61771224]; Research Grant of Jiangsu Province Biomass Energy and Materials Laboratory [JSBEM201917]; National Key Research and Development Program of China [2018YFF0213601, 2019YFB1504000]; Six Major Talent Summit Program of Jiangsu Province [JNHB-015]; Priority Academic Program Development of Jiangsu Higher Education Institutions (PAPD)	National Natural Science Foundation of China(National Natural Science Foundation of China (NSFC)); Research Grant of Jiangsu Province Biomass Energy and Materials Laboratory; National Key Research and Development Program of China(National Key Research & Development Program of China); Six Major Talent Summit Program of Jiangsu Province; Priority Academic Program Development of Jiangsu Higher Educa…	This study was partially supported by the National Natural Science Foundation of China (No. 21905117, and 61771224), the Research Grant of Jiangsu Province Biomass Energy and Materials Laboratory (JSBEM201917), the National Key Research and Development Program of China (No. 2018YFF0213601, and 2019YFB1504000), the Six Major Talent Summit Program of Jiangsu Province (No. JNHB-015), and the Priorit…		46	28	31	11	202	ELSEVIER	AMSTERDAM	RADARWEG 29, 1043 NX AMSTERDAM, NETHERLANDS	0048-9697	1879-1026		SCI TOTAL ENVIRON	Sci. Total Environ.	FEB 1	2021	754
[truncated: 3,829 more rows]
[truncated: 22 more columns]

## Sheet: Occurrences of Keywords
Keyword	Occurrences
co-pyrolysis	941
biomass	613
bio - oil	295
pyrolysis	288
kinetics	237
biochar	215
lignocellulosic biomass	200
waste	185
cellulose	168
catalytic pyrolysis	168
sewage - sludge	166
temperature	155
conversion	146
gasification	144
behavior	124
lignin	121
adsorption	108
combustion	103
polyethylene	102
plastics	100
degradation	96
microalgae	94
thermogravimetric analysis	92
high - density polyethylene	89
removal	84
mechanism	83
oil	82
rice husk	80
catalytic co - pyrolysis	80
wood	79
biomass pyrolysis	77
fuel	75
thermal - degradation	73
polypropylene	72
activated carbon	70
carbon	69
parameters	68
performance	68
parameters	68
char	67
energy	66
sewage sludge	64
products	63
heavy - metals	61
plastic waste	61
thermal - behavior	60
thermal - decomposition	60
catalytic fast pyrolysis	56
bio - oil production	52
polystyrene	51
lignite	51
catalyst	50
decomposition	49
municipal solid - waste	48
synergistic effect	47
water	45
hemicellulose	45
aromatics	45
mechanisms	44
recovery	43
hydrocarbons	43
microwave pyrolysis	42
microwave - assisted pyrolysis	42
fluidized - bed	42
torrefaction	42
density polyethylene	42
microwave pyrolysis	42
microwave - assisted pyrolysis	42
straw	41
sludge	41
thermochemical conversion	41
zeolite	41
yield	41
mixtures	39
rice straw	38
aromatic - hydrocarbons	37
hydrogen	37
coal	36
optimization	36
acid	36
blends	35
low - density polyethylene	35
transformation	35
fast pyrolysis	35
blends	35
quality	34
sawdust	34
pvc	34
slow pyrolysis	34
cracking	34
sorption	34
in - situ	33
waste plastics	33
soil	33
steam gasification	32
components	32
food waste	32
ftir	32
bituminous coal	31
model	31
evolution	31
kinetic analysis	30
biofuels	30
microwave	30

## Sheet: Paper with years
Keywords	Year	Total reseach	Keywords	Year	Total reseach	Keywords	Year	Total reseach
[truncated: 23 more rows]
